# Supplementary material for: Revisiting the origin of the bending in group 2 metallocenes AeCp2 (Ae = Be–Ba)
Source: Royal Society of Chemistry journal article supplement (doi:10.1039/d2cp05020j), 2023-01-01
Supplement: d2cp05020j1.pdf [file d2cp05020j1.pdf]

## Supporting Information

for

### Revisiting the Origin of the Bending in Group 2 Metallocenes $\text{Cp}_2\text{Ae}$ ( $\text{Ae} = \text{Be} - \text{Ba}$ )

Tetiana Sergeieva,<sup>a</sup> T. Ilgin Demirer,<sup>a</sup> Axel Wuttke,<sup>b</sup> Ricardo A. Mata,<sup>\*b</sup> and André Schäfer,<sup>\*a</sup> Gerrit-Jan Linker,<sup>\*c</sup> and Diego M. Andrada,<sup>\*a</sup>

<sup>a</sup> *Institut für Allgemeine und Anorganische Chemie, Universität des Saarlandes, D-66123 Saarbrücken, Germany.*

<sup>b</sup> *Institut für Physikalische Chemie, Georg-August-Universität Göttingen, Tammannstrasse 6, D-37077 Göttingen, Germany.*

<sup>c</sup> *MESA+ Institute for Nanotechnology, University of Twente, 7522 NB Enschede, The Netherlands.*

## Table of Content

|                                                |            |
|------------------------------------------------|------------|
| <b>Geometry and Bond Dissociation Energies</b> | <b>S3</b>  |
| <b>Energy Decomposition Analysis</b>           | <b>S6</b>  |
| <b>Orbital Scheme</b>                          | <b>S33</b> |
| <b>Electronic Energy and xyz coordinates</b>   | <b>S34</b> |

## Geometry and Bond Dissociation Energies

**Table S1.** Geometrical Parameters (in Å and °) and bond dissociation energy ( $D_e$  in kcal/mol) at the BP86-D3(BJ)/def2-TZVPP and M06-2X/def2-TZVPP (in parenthesis) level of theory.<sup>[a,b]</sup>

| [Ae(C <sub>5</sub> R <sub>5</sub> ) <sub>2</sub> ] | Distance C <sub>5</sub> R <sub>5</sub> -Ae | Angle C <sub>5</sub> R <sub>5</sub> -Ae-C <sub>5</sub> R <sub>5</sub> | $D_e^a$       |
|----------------------------------------------------|--------------------------------------------|-----------------------------------------------------------------------|---------------|
| [Be(Cp) <sub>2</sub> ]                             | 1.649 (1.642)                              | 179.9 (180.0)                                                         | 707.2 (714.5) |
| [Mg(Cp) <sub>2</sub> ]                             | 2.000 (1.982)                              | 179.6 (179.6)                                                         | 572.6 (581.1) |
| [Ca(Cp) <sub>2</sub> ]                             | 2.332 (2.340)                              | 163.6 (163.5)                                                         | 503.7 (502.4) |
| [Sr(Cp) <sub>2</sub> ]                             | 2.514 (2.524)                              | 150.0 (149.9)                                                         | 467.4 (468.7) |
| [Ba(Cp) <sub>2</sub> ]                             | 2.691 (2.704)                              | 131.4 (136.9)                                                         | 442.0 (441.9) |
| [Be(Cp*) <sub>2</sub> ]                            | 1.645 ( 1.628)                             | 180.0 (179.9)                                                         | 721.6 (729.4) |
| [Mg(Cp*) <sub>2</sub> ]                            | 1.957 (1.953)                              | 180.0 (180.0)                                                         | 578.6 (584.2) |
| [Ca(Cp*) <sub>2</sub> ]                            | 2.296 (2.320)                              | 154.0 (151.7)                                                         | 506.8 (500.8) |
| [Sr(Cp*) <sub>2</sub> ]                            | 2.477 (2.503)                              | 148.8 (143.4)                                                         | 469.3 (465.3) |
| [Ba(Cp*) <sub>2</sub> ]                            | 2.661 (2.671)                              | 139.1 (137.1)                                                         | 445.2 (439.5) |

<sup>[a]</sup> The dissociation energies ( $D_e$ ) considering the [Ae(C<sub>5</sub>R<sub>5</sub>)<sub>2</sub>] → Ae<sup>2+</sup> + 2 C<sub>5</sub>R<sub>5</sub><sup>-</sup> dissociation. <sup>[b]</sup> All dissociation energy values are counterpoise corrected.

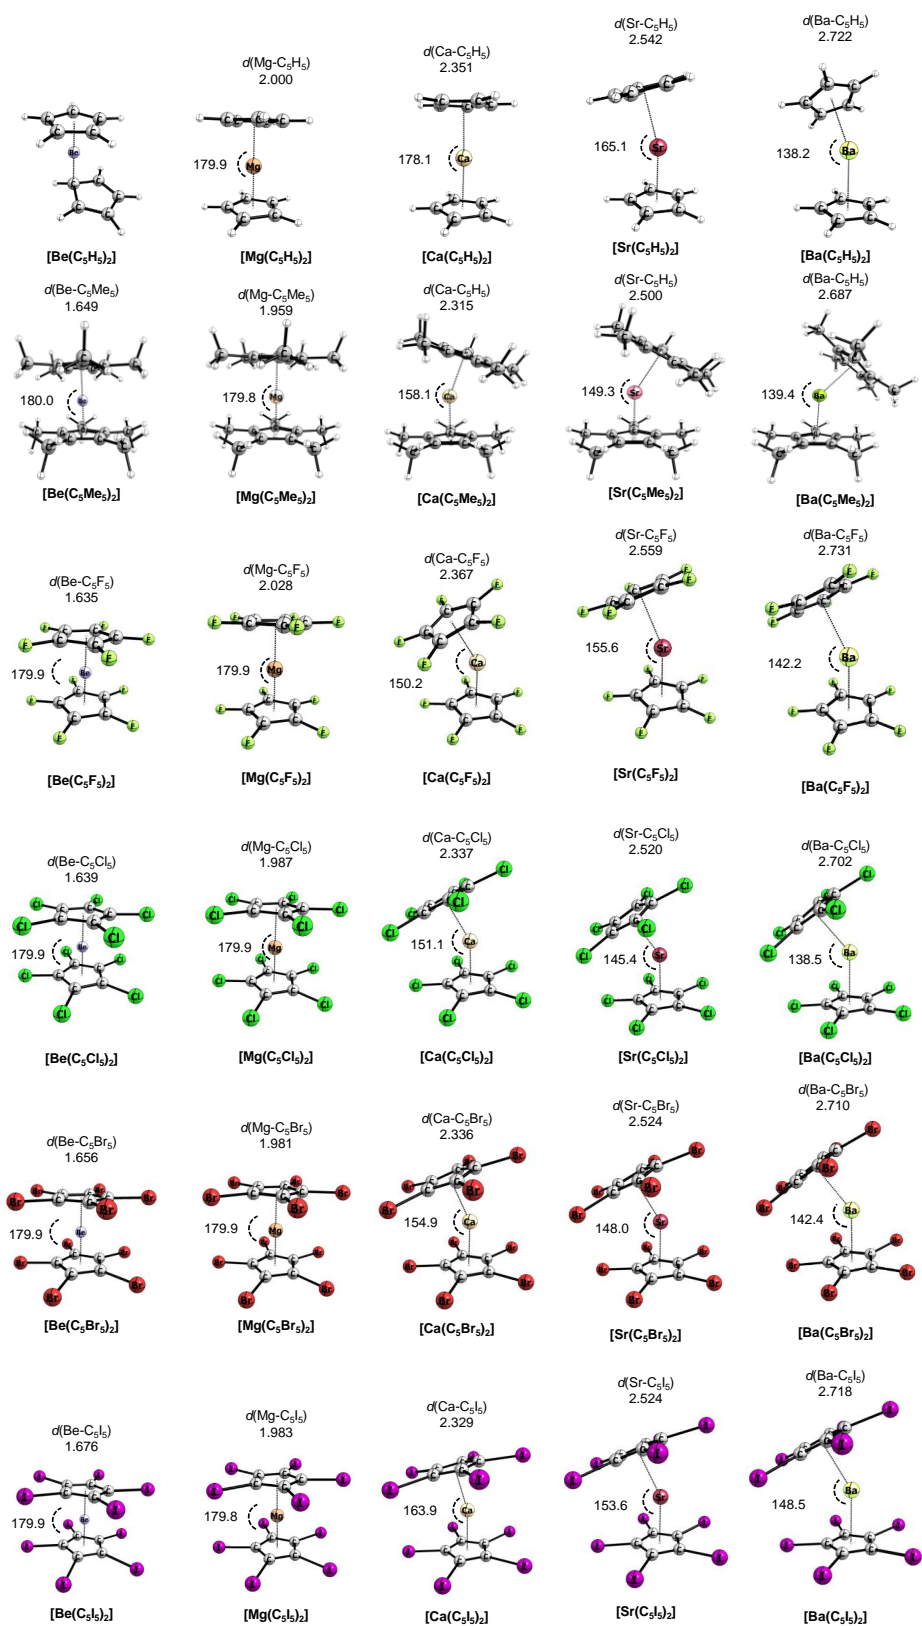

**Figure S1.** Optimized geometries of Group 2 metallocenes  $[Ae(C_5R_5)_2]$  (Ae = Be-Ba, R = H, Me, F, Cl, Br, I) at the B3LYP-D3(BJ)/def2-TZVPP level of theory.

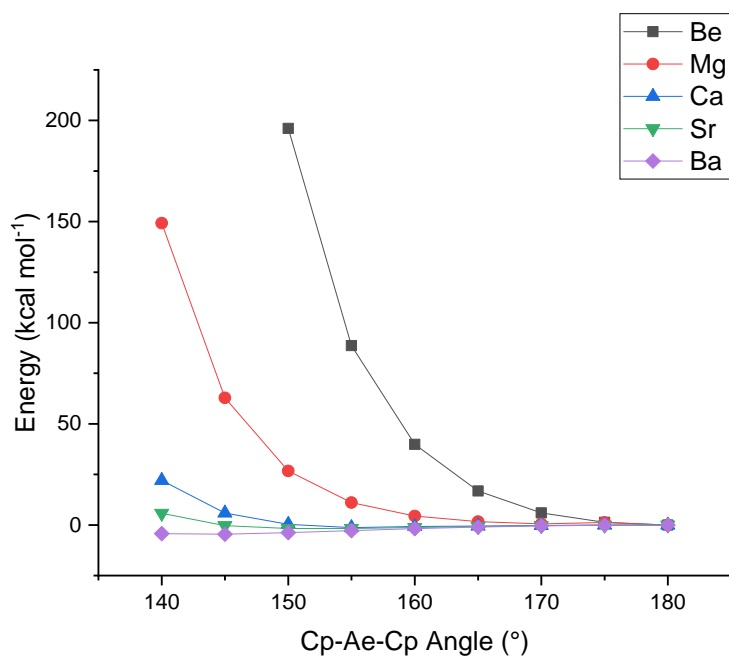

**Figure S2.** Electronic Energy vs bending angle of Group 2 metallocenes  $[Ae(Cp)_2]$  ( $Ae = Be-Ba$ ) at the LCCSD(T)/cc-pCVTZ&cc-pVTZ//B3LYP-D3(BJ)/def2-TZVPP level of theory. The energy is relative to the structure at  $180^\circ$ .

## Energy Decomposition Analysis

**Table S2.** Energy decomposition analysis at the BP86-D3(BJ)/TZ2P level of theory for the [Ae(C<sub>5</sub>R<sub>5</sub>)<sub>2</sub>] (Ae = Be-Ba, R =H, Me, F, Cl, Br, I) complexes. Energy values are given in kcal/mol.

|                                                       | [Be(Cp) <sub>2</sub> ]                                                                     | [Mg(Cp) <sub>2</sub> ]                                                                     | [Ca(Cp) <sub>2</sub> ]                                                                     | [Sr(Cp) <sub>2</sub> ]                                                                     | [Ba(Cp) <sub>2</sub> ]                                                                     |
|-------------------------------------------------------|--------------------------------------------------------------------------------------------|--------------------------------------------------------------------------------------------|--------------------------------------------------------------------------------------------|--------------------------------------------------------------------------------------------|--------------------------------------------------------------------------------------------|
| Fragments                                             | Be <sup>2+</sup> (s <sup>0</sup> ); 2Cp <sup>-</sup> (a <sup>,32</sup> a <sup>,20</sup> )  | Mg <sup>2+</sup> (s <sup>0</sup> ); 2Cp <sup>-</sup> (a <sup>,32</sup> a <sup>,20</sup> )  | Ca <sup>2+</sup> (s <sup>0</sup> ); 2Cp <sup>-</sup> (a <sup>,32</sup> a <sup>,20</sup> )  | Sr <sup>2+</sup> (s <sup>0</sup> ); 2Cp <sup>-</sup> (a <sup>,32</sup> a <sup>,20</sup> )  | Ba <sup>2+</sup> (s <sup>0</sup> ); 2Cp <sup>-</sup> (a <sup>,32</sup> a <sup>,20</sup> )  |
| ΔE <sub>int</sub>                                     | -706.0                                                                                     | -569.7                                                                                     | -503.0                                                                                     | -466.0                                                                                     | -440.7                                                                                     |
| ΔE <sub>Pauli</sub>                                   | 81.5                                                                                       | 74.8                                                                                       | 97.1                                                                                       | 96.9                                                                                       | 105.5                                                                                      |
| ΔE <sub>elstat</sub> <sup>a</sup>                     | -517.8 (65.8 %)                                                                            | -494.0 (76.7 %)                                                                            | -465.5 (74.2 %)                                                                            | -446.2 (79.3 %)                                                                            | -428.3 (78.4 %)                                                                            |
| ΔE <sub>orb</sub> <sup>a</sup>                        | -260.7 (33.1 %)                                                                            | -142.1 (22.1 %)                                                                            | -126.1 (20.1 %)                                                                            | -108.1 (19.2 %)                                                                            | -108.3 (19.8 %)                                                                            |
| ΔE <sub>disp</sub> <sup>a</sup>                       | -9.0 (1.1 %)                                                                               | -8.3 (1.3 %)                                                                               | -35.4 (5.7 %)                                                                              | -8.6 (1.5 %)                                                                               | -9.6 (1.8 %)                                                                               |
| ΔE <sub>ρ1</sub> (a' → p <sub>x</sub> ) <sup>b</sup>  | -53.6 (20.6 %)                                                                             | -19.2 (13.5 %)                                                                             | -8.1 (6.4 %)                                                                               | -7.5 (6.9 %)                                                                               | -10.2 (9.4 %)                                                                              |
| ΔE <sub>ρ2</sub> (a'' → p <sub>y</sub> ) <sup>b</sup> | -53.8 (20.6 %)                                                                             | -19.1 (13.4 %)                                                                             | -8.2 (6.5 %)                                                                               | -7.5 (6.9 %)                                                                               | -7.4 (6.8 %)                                                                               |
| ΔE <sub>ρ3</sub> (a' → p <sub>z</sub> ) <sup>b</sup>  | -44.5 (17.1 %)                                                                             | -16.3 (11.5 %)                                                                             | -6.2 (4.9 %)                                                                               | -4.6 (4.3 %)                                                                               | -3.8 (3.5 %)                                                                               |
| ΔE <sub>ρ4</sub> (a' → s) <sup>b</sup>                | -40.5 (15.5 %)                                                                             | -25.6 (18.0 %)                                                                             | -15.6 (12.4 %)                                                                             | -15.7 (14.5 %)                                                                             | -18.9 (17.5 %)                                                                             |
| ΔE <sub>ρ5</sub> (a' → d <sub>xz</sub> ) <sup>b</sup> | -12.7 (4.9 %)                                                                              | -13.6 (9.6 %)                                                                              | -31.5 (25.0 %)                                                                             | -26.0 (24.1 %)                                                                             | -24.8 (22.9 %)                                                                             |
| ΔE <sub>ρ6</sub> (a' → d <sub>yz</sub> ) <sup>b</sup> | -12.7 (4.9 %)                                                                              | -13.6 (9.6 %)                                                                              | -30.9 (24.5 %)                                                                             | -24.7 (22.8 %)                                                                             | -22.4 (20.7 %)                                                                             |
| ΔE <sub>orb(rest)</sub> <sup>b</sup>                  | -42.9 (16.4 %)                                                                             | -34.7 (24.4 %)                                                                             | -25.6 (20.3 %)                                                                             | -22.1 (20.4 %)                                                                             | -20.8 (19.2 %)                                                                             |
| ΔE <sub>prep</sub>                                    | 0.6                                                                                        | 0.3                                                                                        | 0.5                                                                                        | 0.5                                                                                        | 0.4                                                                                        |
| -D <sub>e</sub>                                       | -705.4                                                                                     | -569.4                                                                                     | -502.5                                                                                     | -465.5                                                                                     | -440.3                                                                                     |
|                                                       | [Be(Cp*) <sub>2</sub> ]                                                                    | [Mg(Cp*) <sub>2</sub> ]                                                                    | [Ca(Cp*) <sub>2</sub> ]                                                                    | [Sr(Cp*) <sub>2</sub> ]                                                                    | [Ba(Cp*) <sub>2</sub> ]                                                                    |
| Fragments                                             | Be <sup>2+</sup> (s <sup>0</sup> ); 2Cp <sup>*-</sup> (a <sup>,32</sup> a <sup>,20</sup> ) | Mg <sup>2+</sup> (s <sup>0</sup> ); 2Cp <sup>*-</sup> (a <sup>,32</sup> a <sup>,20</sup> ) | Ca <sup>2+</sup> (s <sup>0</sup> ); 2Cp <sup>*-</sup> (a <sup>,32</sup> a <sup>,20</sup> ) | Sr <sup>2+</sup> (s <sup>0</sup> ); 2Cp <sup>*-</sup> (a <sup>,32</sup> a <sup>,20</sup> ) | Ba <sup>2+</sup> (s <sup>0</sup> ); 2Cp <sup>*-</sup> (a <sup>,32</sup> a <sup>,20</sup> ) |
| ΔE <sub>int</sub>                                     | -725.1                                                                                     | -581.2                                                                                     | -511.0                                                                                     | -472.6                                                                                     | -449.3                                                                                     |
| ΔE <sub>Pauli</sub>                                   | 93.5                                                                                       | 88.5                                                                                       | 112.5                                                                                      | 110.1                                                                                      | 116.8                                                                                      |
| ΔE <sub>elstat</sub> <sup>a</sup>                     | -503.9 (61.5 %)                                                                            | -478.2 (71.4 %)                                                                            | -447.4 (71.3 %)                                                                            | -428.2 (73.5 %)                                                                            | -411.3 (72.7 %)                                                                            |
| ΔE <sub>orb</sub> <sup>a</sup>                        | -291.7 (35.6 %)                                                                            | -171.9 (25.7 %)                                                                            | -156.9 (25.0 %)                                                                            | -135.6 (23.3 %)                                                                            | -134.3 (23.7 %)                                                                            |
| ΔE <sub>disp</sub> <sup>a</sup>                       | -23.1 (2.8 %)                                                                              | -19.6 (2.9 %)                                                                              | -19.2 (3.1 %)                                                                              | -18.9 (3.2 %)                                                                              | -20.4 (3.6 %)                                                                              |
| ΔE <sub>ρ1</sub> (a' → p <sub>x</sub> ) <sup>b</sup>  | -56.2 (19.3 %)                                                                             | -21.1 (12.3 %)                                                                             | -9.7 (7.7 %)                                                                               | -8.6 (6.3 %)                                                                               | -10.9 (8.1 %)                                                                              |
| ΔE <sub>ρ2</sub> (a'' → p <sub>y</sub> ) <sup>b</sup> | -55.9 (19.2 %)                                                                             | -21.0 (12.2 %)                                                                             | -9.1 (7.2 %)                                                                               | -8.2 (6.1 %)                                                                               | -7.9 (5.9 %)                                                                               |
| ΔE <sub>ρ3</sub> (a' → p <sub>z</sub> ) <sup>b</sup>  | -44.8 (15.4 %)                                                                             | -16.6 (9.7 %)                                                                              | -6.0 (4.8 %)                                                                               | -4.4 (3.2 %)                                                                               | -3.5 (2.6 %)                                                                               |

|                                                  |                                                                                                                            |                                                                                                                            |                                                                                                                            |                                                                                                                            |                                                                                                                            |
|--------------------------------------------------|----------------------------------------------------------------------------------------------------------------------------|----------------------------------------------------------------------------------------------------------------------------|----------------------------------------------------------------------------------------------------------------------------|----------------------------------------------------------------------------------------------------------------------------|----------------------------------------------------------------------------------------------------------------------------|
| $\Delta E_{\rho 4}(a' \rightarrow s)^b$          | -40.7 (14.0 %)                                                                                                             | -25.7 (15.0 %)                                                                                                             | -18.5 (14.7 %)                                                                                                             | -17.6 (12.9 %)                                                                                                             | -20.3 (15.1 %)                                                                                                             |
| $\Delta E_{\rho 5}(a' \rightarrow d_{xz})^b$     | -12.9 (4.4 %)                                                                                                              | -14.9 (8.7 %)                                                                                                              | -35.1 (27.8 %)                                                                                                             | -29.1 (21.5 %)                                                                                                             | -28.2 (21.0 %)                                                                                                             |
| $\Delta E_{\rho 6}(a' \rightarrow d_{yz})^b$     | -12.9 (4.4 %)                                                                                                              | -14.8 (8.6 %)                                                                                                              | -33.3 (26.5 %)                                                                                                             | -27.4 (20.2 %)                                                                                                             | -25.2 (18.8 %)                                                                                                             |
| $\Delta E_{\text{orb}(\text{rest})}^b$           | -68.3 (23.4 %)                                                                                                             | -40.7 (33.6 %)                                                                                                             | -45.2 (35.9 %)                                                                                                             | -40.3 (29.7 %)                                                                                                             | -38.3 (28.5 %)                                                                                                             |
| $\Delta E_{\text{prep}}$                         | 1.7                                                                                                                        | 1.8                                                                                                                        | 1.6                                                                                                                        | 1.6                                                                                                                        | 1.3                                                                                                                        |
| $-D_e$                                           | -723.4                                                                                                                     | -579.4                                                                                                                     | -509.4                                                                                                                     | -471.0                                                                                                                     | -448.0                                                                                                                     |
|                                                  | [Be(C <sub>5</sub> F <sub>5</sub> ) <sub>2</sub> ]                                                                         | [Mg(C <sub>5</sub> F <sub>5</sub> ) <sub>2</sub> ]                                                                         | [Ca(C <sub>5</sub> F <sub>5</sub> ) <sub>2</sub> ]                                                                         | [Sr(C <sub>5</sub> F <sub>5</sub> ) <sub>2</sub> ]                                                                         | [Ba(C <sub>5</sub> F <sub>5</sub> ) <sub>2</sub> ]                                                                         |
| Fragments                                        | Be <sup>2+</sup> (s <sup>0</sup> ); 2(C <sub>5</sub> F <sub>5</sub> ) <sup>-</sup> (a <sup>'32</sup> a'' <sup>'20</sup> )  | Mg <sup>2+</sup> (s <sup>0</sup> ); 2(C <sub>5</sub> F <sub>5</sub> ) <sup>-</sup> (a <sup>'32</sup> a'' <sup>'20</sup> )  | Ca <sup>2+</sup> (s <sup>0</sup> ); 2(C <sub>5</sub> F <sub>5</sub> ) <sup>-</sup> (a <sup>'32</sup> a'' <sup>'20</sup> )  | Sr <sup>2+</sup> (s <sup>0</sup> ); 2(C <sub>5</sub> F <sub>5</sub> ) <sup>-</sup> (a <sup>'32</sup> a'' <sup>'20</sup> )  | Ba <sup>2+</sup> (s <sup>0</sup> ); 2(C <sub>5</sub> F <sub>5</sub> ) <sup>-</sup> (a <sup>'32</sup> a'' <sup>'20</sup> )  |
| $\Delta E_{\text{int}}$                          | -650.6                                                                                                                     | -503.4                                                                                                                     | -444.4                                                                                                                     | -409.4                                                                                                                     | -388.6                                                                                                                     |
| $\Delta E_{\text{Pauli}}$                        | 74.6                                                                                                                       | 64.9                                                                                                                       | 81.58                                                                                                                      | 76.4                                                                                                                       | 81.9                                                                                                                       |
| $\Delta E_{\text{elstat}}^a$                     | -419.49 (57.8 %)                                                                                                           | -403.4 (71.0 %)                                                                                                            | -376.2 (71.5 %)                                                                                                            | -360.7 (74.2 %)                                                                                                            | -347.5 (73.9 %)                                                                                                            |
| $\Delta E_{\text{orb}}^a$                        | -295.2 (40.7 %)                                                                                                            | -156.1 (27.5 %)                                                                                                            | -140.3 (26.7 %)                                                                                                            | -116.0 (23.9 %)                                                                                                            | -113.1 (24.0 %)                                                                                                            |
| $\Delta E_{\text{disp}}^a$                       | -10.52 (1.4 %)                                                                                                             | -8.8 (1.5 %)                                                                                                               | -9.4 (1.8 %)                                                                                                               | -9.0 (1.9 %)                                                                                                               | -9.8 (2.1 %)                                                                                                               |
| $\Delta E_{\rho 1}(a' \rightarrow p_x)^b$        | -61.7 (20.9 %)                                                                                                             | -20.8 (13.2 %)                                                                                                             | -                                                                                                                          | -                                                                                                                          | -                                                                                                                          |
| $\Delta E_{\rho 2}(a'' \rightarrow p_y)^b$       | -61.4 (20.8 %)                                                                                                             | -20.7 (13.2 %)                                                                                                             | -9.3 (6.6 %)                                                                                                               | -                                                                                                                          | -                                                                                                                          |
| $\Delta E_{\rho 3}(a' \rightarrow p_z)^b$        | -46.6 (15.7 %)                                                                                                             | -17.0 (10.8 %)                                                                                                             | -6.2 (4.4 %)                                                                                                               | -4.7 (3.3 %)                                                                                                               | -4.0 (3.5 %)                                                                                                               |
| $\Delta E_{\rho 4}(a' \rightarrow s)^b$          | -45.0 (15.2 %)                                                                                                             | -29.4 (18.7 %)                                                                                                             | -10.0 (7.1 %)                                                                                                              | -8.0 (5.6 %)                                                                                                               | -7.9 (7.0 %)                                                                                                               |
| $\Delta E_{\rho 5}(a' \rightarrow d_{xz})^b$     | -10.6 (3.6 %)                                                                                                              | -12.6 (8.0 %)                                                                                                              | -33.1 (23.5 %)                                                                                                             | -27.3 (19.1 %)                                                                                                             | -25.7 (22.7 %)                                                                                                             |
| $\Delta E_{\rho 6}(a' \rightarrow d_{yz})^b$     | -10.5 (3.6 %)                                                                                                              | -12.5 (8.0 %)                                                                                                              | -30.6 (21.7 %)                                                                                                             | -25.6 (17.9 %)                                                                                                             | -22.6 (20.0 %)                                                                                                             |
| $\Delta E_{\rho 7}(a' \rightarrow d_{xy})^b$     | -                                                                                                                          | -                                                                                                                          | -                                                                                                                          | -7.0 (4.9 %)                                                                                                               | -9.3 (8.2 %)                                                                                                               |
| $\Delta E_{\rho 8}(a' \rightarrow d_{x^2y^2})^b$ | -                                                                                                                          | -                                                                                                                          | -19.7 (14.0 %)                                                                                                             | -                                                                                                                          | -                                                                                                                          |
| $\Delta E_{\rho 9}(a' \rightarrow d_{z^2})^b$    | -                                                                                                                          | -                                                                                                                          | -                                                                                                                          | -16.6 (11.6 %)                                                                                                             | -18.9 (16.6 %)                                                                                                             |
| $\Delta E_{\text{orb}(\text{rest})}^b$           | -59.7 (20.2 %)                                                                                                             | -43.8 (27.9 %)                                                                                                             | -31.8 (22.6 %)                                                                                                             | -54.0 (37.7 %)                                                                                                             | -25.0 (22.0 %)                                                                                                             |
| $\Delta E_{\text{prep}}$                         | 0.6                                                                                                                        | 0.3                                                                                                                        | 0.5                                                                                                                        | 0.5                                                                                                                        | 0.4                                                                                                                        |
| $-D_e$                                           | -705.4                                                                                                                     | -569.4                                                                                                                     | -502.5                                                                                                                     | -465.5                                                                                                                     | -440.3                                                                                                                     |
|                                                  | [Be(C <sub>5</sub> Cl <sub>5</sub> ) <sub>2</sub> ]                                                                        | [Mg(C <sub>5</sub> Cl <sub>5</sub> ) <sub>2</sub> ]                                                                        | [Ca(C <sub>5</sub> Cl <sub>5</sub> ) <sub>2</sub> ]                                                                        | [Sr(C <sub>5</sub> Cl <sub>5</sub> ) <sub>2</sub> ]                                                                        | [Ba(C <sub>5</sub> Cl <sub>5</sub> ) <sub>2</sub> ]                                                                        |
| Fragments                                        | Be <sup>2+</sup> (s <sup>0</sup> ); 2(C <sub>5</sub> Cl <sub>5</sub> ) <sup>-</sup> (a <sup>'32</sup> a'' <sup>'20</sup> ) | Mg <sup>2+</sup> (s <sup>0</sup> ); 2(C <sub>5</sub> Cl <sub>5</sub> ) <sup>-</sup> (a <sup>'32</sup> a'' <sup>'20</sup> ) | Ca <sup>2+</sup> (s <sup>0</sup> ); 2(C <sub>5</sub> Cl <sub>5</sub> ) <sup>-</sup> (a <sup>'32</sup> a'' <sup>'20</sup> ) | Sr <sup>2+</sup> (s <sup>0</sup> ); 2(C <sub>5</sub> Cl <sub>5</sub> ) <sup>-</sup> (a <sup>'32</sup> a'' <sup>'20</sup> ) | Ba <sup>2+</sup> (s <sup>0</sup> ); 2(C <sub>5</sub> Cl <sub>5</sub> ) <sup>-</sup> (a <sup>'32</sup> a'' <sup>'20</sup> ) |
| $\Delta E_{\text{int}}$                          | -629.9                                                                                                                     | -489.1                                                                                                                     | -433.1                                                                                                                     | -400.2                                                                                                                     | -381.4                                                                                                                     |
| $\Delta E_{\text{Pauli}}$                        | 80.7                                                                                                                       | 69.8                                                                                                                       | 84.0                                                                                                                       | 79.6                                                                                                                       | 82.8                                                                                                                       |
| $\Delta E_{\text{elstat}}^a$                     | -362.5 (51.0 %)                                                                                                            | -355.1 (63.5 %)                                                                                                            | -337.8 (65.3 %)                                                                                                            | -326.5 (68.0 %)                                                                                                            | -318.1 (68.5 %)                                                                                                            |
| $\Delta E_{\text{orb}}^a$                        | -322.4 (45.4 %)                                                                                                            | -183.3 (32.8 %)                                                                                                            | -158.7 (30.7 %)                                                                                                            | -133.3 (27.8 %)                                                                                                            | -125.5 (27.0 %)                                                                                                            |
| $\Delta E_{\text{disp}}^a$                       | -25.7 (3.6 %)                                                                                                              | -20.6 (3.7 %)                                                                                                              | -20.6 (4.0 %)                                                                                                              | -20.0 (4.2 %)                                                                                                              | -20.7 (4.4 %)                                                                                                              |
| $\Delta E_{\rho 1}(a' \rightarrow p_x)^b$        | -57.8 (17.9 %)                                                                                                             | -19.4 (10.6 %)                                                                                                             | -                                                                                                                          | -                                                                                                                          | -                                                                                                                          |
| $\Delta E_{\rho 2}(a'' \rightarrow p_y)^b$       | -57.6 (17.9 %)                                                                                                             | -19.4 (10.5 %)                                                                                                             | -                                                                                                                          | -                                                                                                                          | -                                                                                                                          |

|                                                   |                                                                                                                          |                                                                                                                          |                                                                                                                          |                                                                                                                          |                                                                                                                          |
|---------------------------------------------------|--------------------------------------------------------------------------------------------------------------------------|--------------------------------------------------------------------------------------------------------------------------|--------------------------------------------------------------------------------------------------------------------------|--------------------------------------------------------------------------------------------------------------------------|--------------------------------------------------------------------------------------------------------------------------|
| $\Delta E_{\rho 3} (a' \rightarrow p_z)^b$        | -47.5 (14.7 %)                                                                                                           | -17.3 (9.4 %)                                                                                                            | -6.1 (3.8 %)                                                                                                             | -                                                                                                                        | -                                                                                                                        |
| $\Delta E_{\rho 4} (a' \rightarrow s)^b$          | -45.1 (14.0 %)                                                                                                           | -27.7 (15.1 %)                                                                                                           | -9.1 (5.7 %)                                                                                                             | -8.2 (6.1 %)                                                                                                             | -                                                                                                                        |
| $\Delta E_{\rho 5} (a' \rightarrow d_{xz})^b$     | -                                                                                                                        | -13.6 (7.4 %)                                                                                                            | -31.0 (19.5 %)                                                                                                           | -24.3 (18.2 %)                                                                                                           | -22.2 (17.7 %)                                                                                                           |
| $\Delta E_{\rho 6} (a' \rightarrow d_{yz})^b$     | -                                                                                                                        | -13.5 (7.4 %)                                                                                                            | -28.3 (17.8 %)                                                                                                           | -21.7 (16.2 %)                                                                                                           | -19.2 (15.3 %)                                                                                                           |
| $\Delta E_{\rho 7} (a' \rightarrow d_{xy})^b$     | -                                                                                                                        | -                                                                                                                        | -8.5 (5.4 %)                                                                                                             | -7.6 (5.7 %)                                                                                                             | -8.8 (7.0 %)                                                                                                             |
| $\Delta E_{\rho 8} (a' \rightarrow d_{x^2y^2})^b$ | -                                                                                                                        | -                                                                                                                        | -                                                                                                                        | -                                                                                                                        | -18.6 (14.8 %)                                                                                                           |
| $\Delta E_{\rho 9} (a' \rightarrow d_{z^2})^b$    | -                                                                                                                        | -                                                                                                                        | -19.8 (12.5 %)                                                                                                           | -18.0 (13.5 %)                                                                                                           | -7.2 (5.7 %)                                                                                                             |
| $\Delta E_{\text{orb}}(\text{rest})^b$            | -114.4 (35.5 %)                                                                                                          | -72.6 (39.6 %)                                                                                                           | -56.1 (35.3 %)                                                                                                           | -53.8 (40.3 %)                                                                                                           | -49.5 (39.4 %)                                                                                                           |
| $\Delta E_{\text{prep}}$                          | 1.7                                                                                                                      | 1.8                                                                                                                      | 1.6                                                                                                                      | 1.6                                                                                                                      | 1.3                                                                                                                      |
| $-D_e$                                            | -723.4                                                                                                                   | -579.4                                                                                                                   | -509.4                                                                                                                   | -471.0                                                                                                                   | -448.0                                                                                                                   |
|                                                   | [Be(C <sub>5</sub> Br <sub>5</sub> ) <sub>2</sub> ]                                                                      | [Mg(C <sub>5</sub> Br <sub>5</sub> ) <sub>2</sub> ]                                                                      | [Ca(C <sub>5</sub> Br <sub>5</sub> ) <sub>2</sub> ]                                                                      | [Sr(C <sub>5</sub> Br <sub>5</sub> ) <sub>2</sub> ]                                                                      | [Ba(C <sub>5</sub> Br <sub>5</sub> ) <sub>2</sub> ]                                                                      |
| Fragments                                         | Be <sup>2+</sup> (s <sup>0</sup> ); 2(C <sub>5</sub> Br <sub>5</sub> ) <sup>-</sup> (a <sup>32</sup> a'' <sup>20</sup> ) | Mg <sup>2+</sup> (s <sup>0</sup> ); 2(C <sub>5</sub> Br <sub>5</sub> ) <sup>-</sup> (a <sup>32</sup> a'' <sup>20</sup> ) | Ca <sup>2+</sup> (s <sup>0</sup> ); 2(C <sub>5</sub> Br <sub>5</sub> ) <sup>-</sup> (a <sup>32</sup> a'' <sup>20</sup> ) | Sr <sup>2+</sup> (s <sup>0</sup> ); 2(C <sub>5</sub> Br <sub>5</sub> ) <sup>-</sup> (a <sup>32</sup> a'' <sup>20</sup> ) | Ba <sup>2+</sup> (s <sup>0</sup> ); 2(C <sub>5</sub> Br <sub>5</sub> ) <sup>-</sup> (a <sup>32</sup> a'' <sup>20</sup> ) |
| $\Delta E_{\text{int}}$                           | -635.4                                                                                                                   | -494.2                                                                                                                   | -440.7                                                                                                                   | -407.7                                                                                                                   | -388.2                                                                                                                   |
| $\Delta E_{\text{Pauli}}$                         | 81.4                                                                                                                     | 71.1                                                                                                                     | 82.0                                                                                                                     | 77.5                                                                                                                     | 79.5                                                                                                                     |
| $\Delta E_{\text{elstat}}^a$                      | -350.6 (48.9 %)                                                                                                          | -340.6 (60.2 %)                                                                                                          | -328.1 (62.8 %)                                                                                                          | -318.0 (65.5 %)                                                                                                          | -310.3 (66.3 %)                                                                                                          |
| $\Delta E_{\text{orb}}^a$                         | -333.2 (46.5 %)                                                                                                          | -196.3 (34.7 %)                                                                                                          | -168.3 (32.2 %)                                                                                                          | -142.1 (29.3 %)                                                                                                          | -132.4 (28.3 %)                                                                                                          |
| $\Delta E_{\text{disp}}^a$                        | -33.1 (4.6 %)                                                                                                            | -28.3 (5.0 %)                                                                                                            | -26.2 (5.2 %)                                                                                                            | -25.1 (5.2 %)                                                                                                            | -25.0 (5.3 %)                                                                                                            |
| $\Delta E_{\rho 1} (a' \rightarrow p_x)^b$        | -57.9 (17.4 %)1                                                                                                          | -20.2 (10.2 %)                                                                                                           | -                                                                                                                        | -                                                                                                                        | -                                                                                                                        |
| $\Delta E_{\rho 2} (a'' \rightarrow p_y)^b$       | -57.8 (17.4 %)2                                                                                                          | -20.1 (10.2 %)                                                                                                           | -                                                                                                                        | -                                                                                                                        | -                                                                                                                        |
| $\Delta E_{\rho 3} (a' \rightarrow p_z)^b$        | -47.2 (14.2 %)4                                                                                                          | -17.4 (8.8 %)                                                                                                            | -                                                                                                                        | -                                                                                                                        | -                                                                                                                        |
| $\Delta E_{\rho 4} (a' \rightarrow s)^b$          | -46.3 (13.9 %)3                                                                                                          | -27.8 (14.1 %)                                                                                                           | -6.1 (3.6 %)                                                                                                             | -5.2 (3.6 %)                                                                                                             | -4.5 (3.4 %)                                                                                                             |
| $\Delta E_{\rho 5} (a' \rightarrow d_{xz})^b$     | -                                                                                                                        | -14.1 (7.2 %)                                                                                                            | -30.7 (18.2 %)                                                                                                           | -24.0 (16.8 %)                                                                                                           | -21.8 (16.4 %)                                                                                                           |
| $\Delta E_{\rho 6} (a' \rightarrow d_{yz})^b$     | -                                                                                                                        | -14.0 (7.1 %)                                                                                                            | -28.5 (16.9 %)                                                                                                           | -21.6 (15.2 %)                                                                                                           | -19.4 (14.7 %)                                                                                                           |
| $\Delta E_{\rho 7} (a' \rightarrow d_{xy})^b$     | -                                                                                                                        | -                                                                                                                        | -8.5 (5.0 %)                                                                                                             | -7.7 (5.4 %)                                                                                                             | -8.5 (6.4 %)                                                                                                             |
| $\Delta E_{\rho 8} (a' \rightarrow d_{x^2y^2})^b$ | -                                                                                                                        | -                                                                                                                        | -19.3 (11.4 %)                                                                                                           | -8.3 (5.8 %)                                                                                                             | -17.8 (13.4 %)                                                                                                           |
| $\Delta E_{\rho 9} (a' \rightarrow d_{z^2})^b$    | -                                                                                                                        | -                                                                                                                        | -9.0 (5.4 %)                                                                                                             | -17.7 (12.4 %)                                                                                                           | -7.2 (5.4 %)                                                                                                             |
| $\Delta E_{\text{orb}}(\text{rest})^b$            | -123.9 (37.2 %)                                                                                                          | -83.2 (42.3 %)7                                                                                                          | -66.5 (39.4 %)                                                                                                           | -57.9 (40.7 %)                                                                                                           | -53.3 (40.2 %)                                                                                                           |
| $\Delta E_{\text{prep}}$                          | 1.7                                                                                                                      | 1.8                                                                                                                      |                                                                                                                          |                                                                                                                          |                                                                                                                          |
| $-D_e$                                            | -723.4                                                                                                                   | -579.4                                                                                                                   |                                                                                                                          |                                                                                                                          |                                                                                                                          |
|                                                   | [Be(C <sub>5</sub> I <sub>5</sub> ) <sub>2</sub> ]                                                                       | [Mg(C <sub>5</sub> I <sub>5</sub> ) <sub>2</sub> ]                                                                       | [Ca(C <sub>5</sub> I <sub>5</sub> ) <sub>2</sub> ]                                                                       | [Sr(C <sub>5</sub> I <sub>5</sub> ) <sub>2</sub> ]                                                                       | [Ba(C <sub>5</sub> I <sub>5</sub> ) <sub>2</sub> ]                                                                       |
| Fragments                                         | Be <sup>2+</sup> (s <sup>0</sup> ); 2(C <sub>5</sub> I <sub>5</sub> ) <sup>-</sup> (a <sup>32</sup> a'' <sup>20</sup> )  | Mg <sup>2+</sup> (s <sup>0</sup> ); 2(C <sub>5</sub> I <sub>5</sub> ) <sup>-</sup> (a <sup>32</sup> a'' <sup>20</sup> )  | Ca <sup>2+</sup> (s <sup>0</sup> ); 2(C <sub>5</sub> I <sub>5</sub> ) <sup>-</sup> (a <sup>32</sup> a'' <sup>20</sup> )  | Sr <sup>2+</sup> (s <sup>0</sup> ); 2(C <sub>5</sub> I <sub>5</sub> ) <sup>-</sup> (a <sup>32</sup> a'' <sup>20</sup> )  | Ba <sup>2+</sup> (s <sup>0</sup> ); 2(C <sub>5</sub> I <sub>5</sub> ) <sup>-</sup> (a <sup>32</sup> a'' <sup>20</sup> )  |
| $\Delta E_{\text{int}}$                           | -640.67                                                                                                                  | -505.2                                                                                                                   | -448.3                                                                                                                   | -414.5                                                                                                                   | -395.5                                                                                                                   |
| $\Delta E_{\text{Pauli}}$                         | 91.9                                                                                                                     | 79.8                                                                                                                     | 87.7                                                                                                                     | 81.6                                                                                                                     | 82.1                                                                                                                     |
| $\Delta E_{\text{elstat}}^a$                      | -344.28 (47.0 %)                                                                                                         | -334.3 (57.1 %)                                                                                                          | -318.7 (59.5 %)                                                                                                          | -309.0 (62.3 %)                                                                                                          | -303.3 (63.5 %)                                                                                                          |
| $\Delta E_{\text{orb}}^a$                         | -343.2 (46.8 %)                                                                                                          | -209.6 (35.8 %)                                                                                                          | -180.3 (33.6 %)                                                                                                          | -152.9 (30.8 %)                                                                                                          | -141.4 (29.6 %)                                                                                                          |



|                                                                  |                 |                |                |                |                |
|------------------------------------------------------------------|-----------------|----------------|----------------|----------------|----------------|
| $\Delta E_{\text{disp}}^{\text{a}}$                              | -45.1 (6.1 %)   | -41.2 (7.0 %)  | -36.9 (6.9 %)  | -34.1 (6.9 %)  | -32.9 (6.9 %)  |
| $\Delta E_{\rho 1}(\text{a}' \rightarrow p_x)^{\text{b}}$        | -56.8 (16.5 %)  | -20.2 (9.6 %)  | -              | -              | -              |
| $\Delta E_{\rho 2}(\text{a}' \rightarrow p_y)^{\text{b}}$        | -56.6 (16.5 %)  | -20.1 (9.6 %)  | -              | -              | -              |
| $\Delta E_{\rho 3}(\text{a}' \rightarrow p_z)^{\text{b}}$        | -46.8 (13.6 %)  | -17.5 (8.3 %)  | -              | -              | -              |
| $\Delta E_{\rho 4}(\text{a}' \rightarrow s)^{\text{b}}$          | -46.6 (13.6 %)  | -27.6 (13.1 %) | -7.8 (4.3 %)   | -7.3 (4.8 %)   | -5.9 (4.1 %)   |
| $\Delta E_{\rho 5}(\text{a}' \rightarrow d_{xz})^{\text{b}}$     | -               | -14.4 (6.8 %)  | -30.5 (16.9 %) | -23.6 (15.4 %) | -21.4 (15.1 %) |
| $\Delta E_{\rho 6}(\text{a}' \rightarrow d_{yz})^{\text{b}}$     | -               | -14.3 (6.8 %)  | -29.6 (16.4 %) | -22.1 (14.4 %) | -20.0 (14.1 %) |
| $\Delta E_{\rho 7}(\text{a}' \rightarrow d_{xy})^{\text{b}}$     | -               | -              | -8.2 (4.5 %)   | -7.9 (5.2 %)   | -8.2 (5.8 %)   |
| $\Delta E_{\rho 8}(\text{a}' \rightarrow d_{x^2y^2})^{\text{b}}$ | -               | -              | -17.7 (9.8 %)  | -17.0 (11.1 %) | -16.9 (11.9 %) |
| $\Delta E_{\rho 9}(\text{a}' \rightarrow d_{z^2})^{\text{b}}$    | -               | -              | -8.4 (4.7 %)   | -8.0 (5.2 %)   | -7.6 (5.4 %)   |
| $\Delta E_{\text{orb}}(\text{rest})^{\text{b}}$                  | -136.1 (39.7 %) | -96.0 (45.6 %) | -78.2 (43.3 %) | -67.2 (43.9 %) | -61.7 (43.5 %) |
| $\Delta E_{\text{prep}}$                                         | 1.7             | 1.7            | 1.7            | 1.7            | 1.7            |
| $-D_e$                                                           | -723.4          | -723.4         | -723.4         | -723.4         | -723.4         |

<sup>a</sup> The value in parenthesis gives the percentage contribution to the total attractive interactions  $\Delta E_{\text{elstat}} + \Delta E_{\text{orb}} + \Delta E_{\text{disp}}$ . <sup>b</sup> The value in parenthesis gives the percentage contribution to the total orbital interactions  $\Delta E_{\text{orb}}$ .

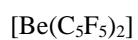

Deformation Densities

(C<sub>5</sub>F<sub>5</sub>)<sub>2</sub><sup>2-</sup> orbitals

Be<sup>2+</sup> orbitals

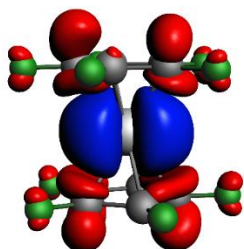

$$\Delta E_1 = -61.7; |v_1| = 0.49$$

$$\Delta E_2 = -61.4; |v_2| = 0.49$$

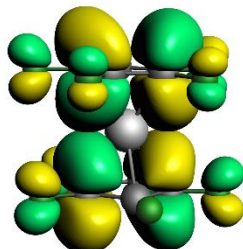

$$\text{HOMO } (\epsilon = 0.61 \text{ eV}) v_1 = -0.24$$

$$\text{HOMO } (\epsilon = 0.61 \text{ eV}) v_2 = -0.24$$

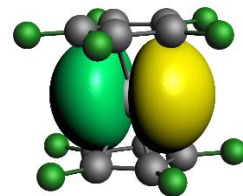

$$\text{LUMO}+1 (\epsilon = -17.36 \text{ eV}) v_1 = +0.38$$

$$\text{LUMO}+1 (\epsilon = -17.36 \text{ eV}) v_2 = +0.38$$

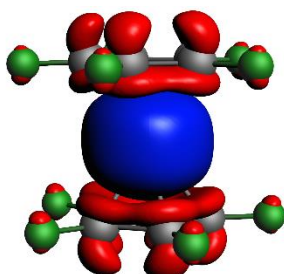

$$\Delta E_3 = -45.0; |v_3| = 0.36$$

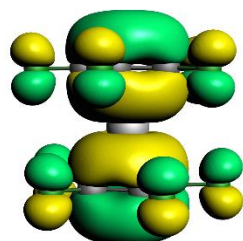

$$\text{HOMO}-1 (\epsilon = -2.75 \text{ eV}) v_3 = -0.3$$

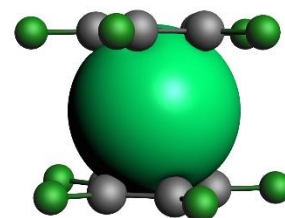

$$\text{LUMO } (\epsilon = -21.1 \text{ eV}) v_3 = +0.46$$

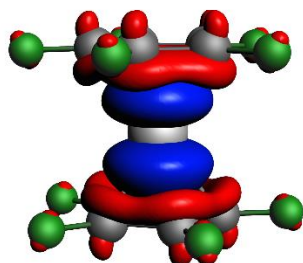

$$\Delta E_4 = -46.6; |v_4| = 0.37$$

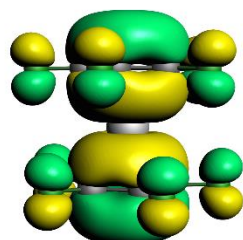

$$\text{HOMO}-1 (\epsilon = -2.75 \text{ eV}) v_4 = -0.26$$

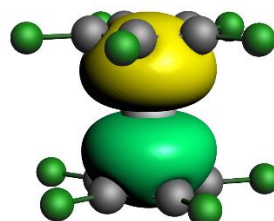

$$\text{LUMO}+1 (\epsilon = -17.36 \text{ eV}) v_4 = +0.37$$

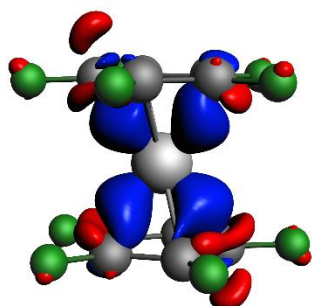

$$\Delta E_5 = -10.6; |v_5| = 0.14$$

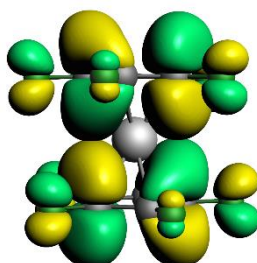

$$\text{HOMO } (\epsilon = 0.61 \text{ eV}) v_5 = -0.02$$

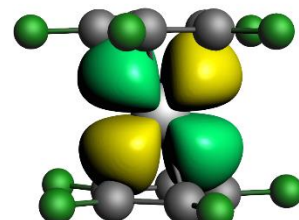

$$\text{LUMO}+5 (\epsilon = 10.4 \text{ eV}) v_5 = +0.036$$

$\Delta E_6 = -10.6$ ;  $|v_6| = 0.14$

HOMO ( $\epsilon = 0.61$  eV)  $v_6 = -0.02$

LUMO+5 ( $\epsilon = 10.4$  eV)  $v_6 = +0.036$

[Mg(C<sub>5</sub>F<sub>5</sub>)<sub>2</sub>]

Deformation Densities

(C<sub>5</sub>F<sub>5</sub>)<sub>2</sub><sup>2-</sup> orbitals

Mg<sup>2+</sup> orbitals

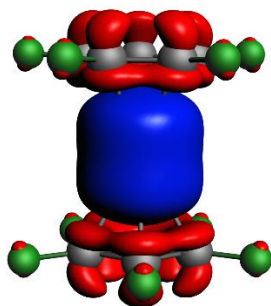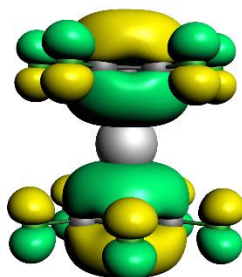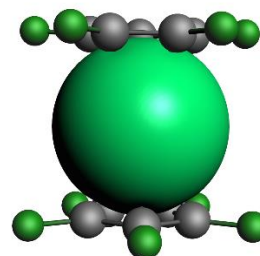

$\Delta E_1 = -29.4$ ;  $|v_1| = 0.36$

HOMO-1 ( $\epsilon = -2.79$  eV)  $v_1 = -0.24$

LUMO ( $\epsilon = -17.84$  eV)  $v_1 = +0.31$

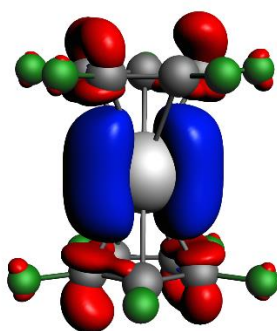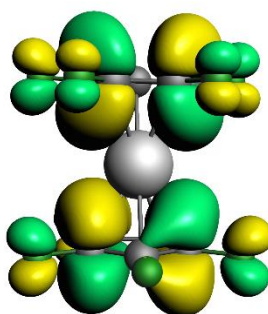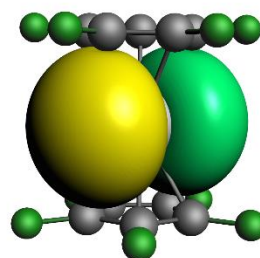

$\Delta E_2 = -20.8$ ;  $|v_2| = 0.30$

HOMO ( $\epsilon = 0.55$  eV)  $v_2 = -0.12$

LUMO+1 ( $\epsilon = -12.63$  eV)  $v_2 = +0.24$

$\Delta E_3 = -20.7$ ;  $|v_3| = 0.30$

HOMO ( $\epsilon = 0.55$  eV)  $v_3 = -0.12$

LUMO+1 ( $\epsilon = -12.63$  eV)  $v_3 = +0.24$

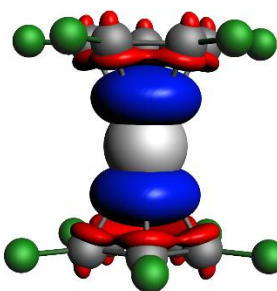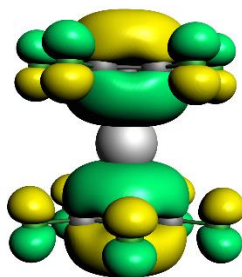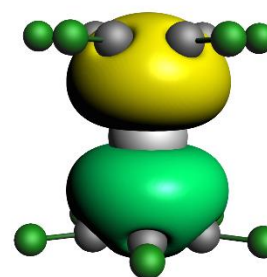

$\Delta E_4 = -17.0$ ;  $|v_4| = 0.22$

HOMO-1 ( $\epsilon = -2.79$  eV)  $v_4 = -0.16$

LUMO+1 ( $\epsilon = -12.63$  eV)  $v_4 = +0.24$

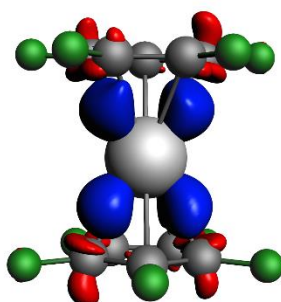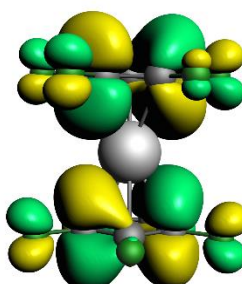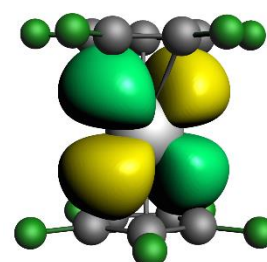

$\Delta E_5 = -12.5$ ;  $|v_5| = 0.18$

HOMO ( $\epsilon = 0.55$  eV)  $v_5 = -0.06$

LUMO+3 ( $\epsilon = -3.04$  eV)  $v_5 = +0.08$

$\Delta E_6 = -12.5$ ;  $|v_6| = 0.18$

HOMO ( $\epsilon = 0.55$  eV)  $v_6 = -0.06$

LUMO+3 ( $\epsilon = -3.04$  eV)  $v_6 = +0.08$

[Ca(C<sub>5</sub>F<sub>5</sub>)<sub>2</sub>]

**Deformation Densities**

**(C<sub>5</sub>F<sub>5</sub>)<sub>2</sub><sup>2-</sup> orbitals**

**Ca<sup>2+</sup> orbitals**

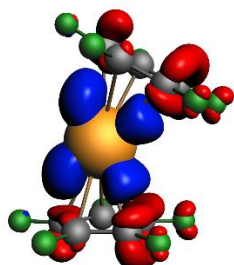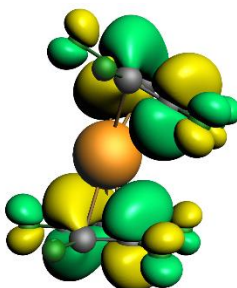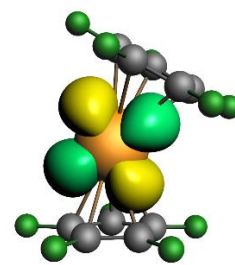

$\Delta E_1 = -33.1$ ;  $|v_1| = 0.51$

HOMO ( $\epsilon = 0.50$  eV)  $v_1 = -0.22$

LUMO ( $\epsilon = -15.91$  eV)  $v_1 = +0.24$

$\Delta E_2 = -30.6$ ;  $|v_2| = 0.49$

HOMO ( $\epsilon = 0.50$  eV)  $v_2 = -0.20$

LUMO ( $\epsilon = -15.91$  eV)  $v_2 = +0.22$

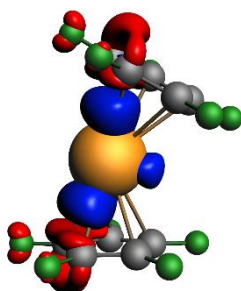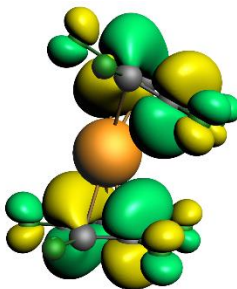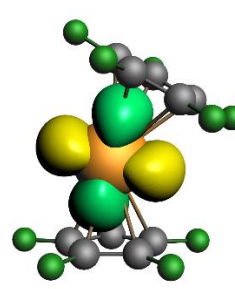

$\Delta E_3 = -19.7$ ;  $|v_3| = 0.35$

HOMO ( $\epsilon = 0.50$  eV)  $v_3 = -0.1$

LUMO ( $\epsilon = -15.91$  eV)  $v_3 = +0.11$

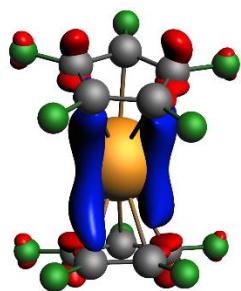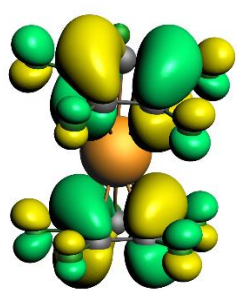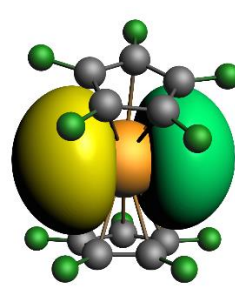

$\Delta E_4 = -9.3$ ;  $|v_4| = 0.22$

HOMO ( $\epsilon = 0.50$  eV)  $v_4 = -0.06$

LUMO+2 ( $\epsilon = -10.53$  eV)  $v_4 = +0.03$

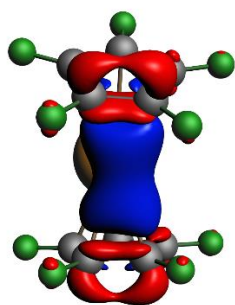

$\Delta E_5 = -10.0$ ;  $|v_5| = 0.19$

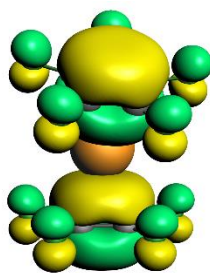

HOMO-1 ( $\epsilon = -2.86$  eV)  $v_5 = -0.08$

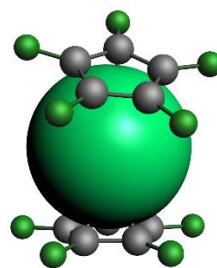

LUMO+1 ( $\epsilon = -14.24$  eV)  $v_5 = +0.12$

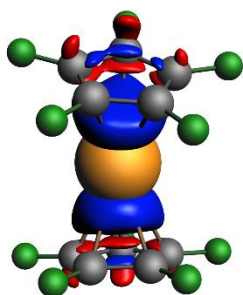

$\Delta E_6 = -6.2$ ;  $|v_6| = 0.12$

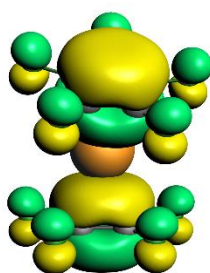

HOMO-1 ( $\epsilon = -2.86$  eV)  $v_6 = -0.06$

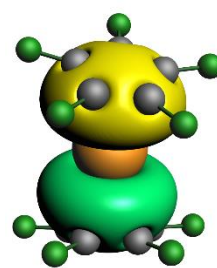

LUMO+2 ( $\epsilon = -10.53$  eV)  $v_6 = +0.06$

[Sr(C<sub>5</sub>F<sub>5</sub>)<sub>2</sub>]

**Deformation Densities**

**(C<sub>5</sub>F<sub>5</sub>)<sub>2</sub><sup>2-</sup> orbitals**

**Sr<sup>2+</sup> orbitals**

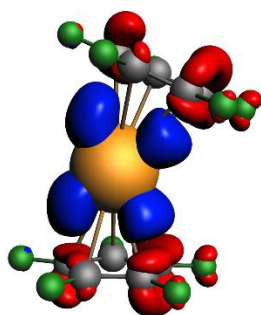

$\Delta E_1 = -27.3$ ;  $|v_1| = 0.47$

$\Delta E_2 = -25.6$ ;  $|v_2| = 0.45$

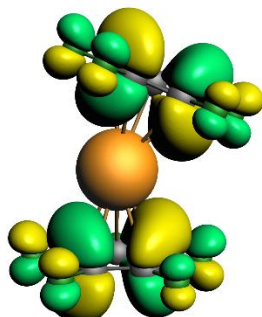

HOMO ( $\epsilon = 0.46$  eV)  $v_1 = -0.24$

HOMO ( $\epsilon = 0.46$  eV)  $v_2 = -0.20$

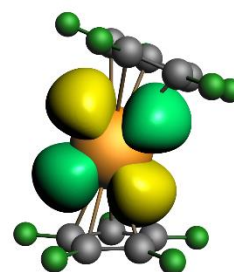

LUMO ( $\epsilon = -13.22$  eV)  $v_1 = +0.24$

LUMO ( $\epsilon = -13.22$  eV)  $v_2 = +0.22$

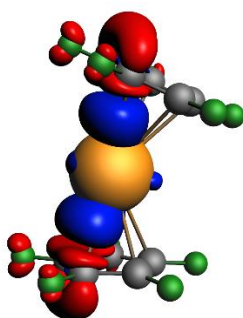

$\Delta E_3 = -16.6$ ;  $|v_3| = 0.32$

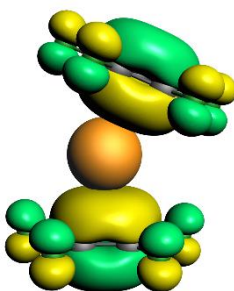

HOMO-1 ( $\epsilon = -2.90$  eV)  $v_3 = -0.08$

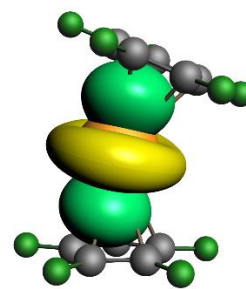

LUMO ( $\epsilon = -13.22$  eV)  $v_3 = +0.11$

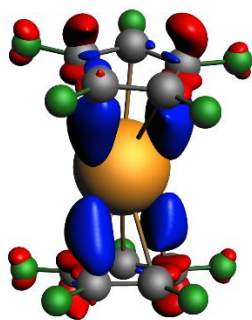

$\Delta E_4 = -7.0$ ;  $|v_4| = 0.18$

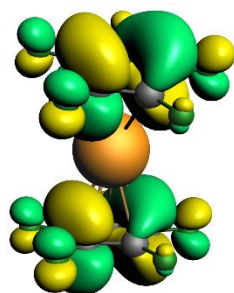

HOMO ( $\epsilon = 0.46$  eV)  $v_4 = -0.20$

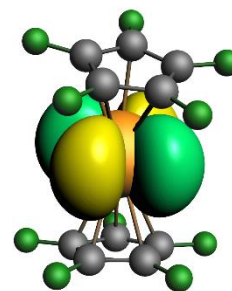

LUMO ( $\epsilon = -13.22$  eV)  $v_4 = +0.02$

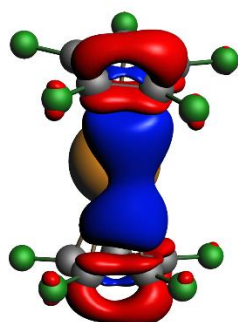

$\Delta E_5 = -8.0$ ;  $|v_5| = 0.18$

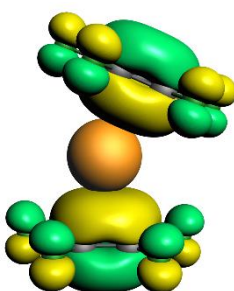

HOMO-1 ( $\epsilon = -2.90$  eV)  $v_5 = -0.06$

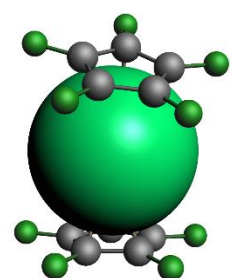

LUMO ( $\epsilon = -13.22$  eV)  $v_5 = +0.07$

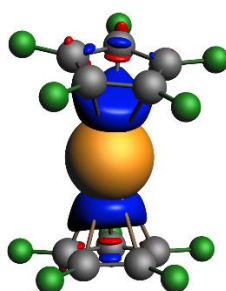

$\Delta E_6 = -4.7$ ;  $|v_6| = 0.11$

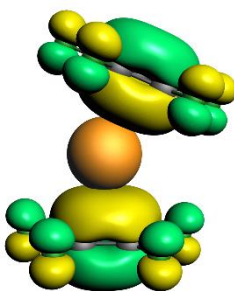

HOMO-1 ( $\epsilon = -2.90$  eV)  $v_6 = -0.02$

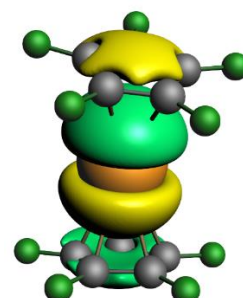

LUMO+4 ( $\epsilon = 0.53$  eV)  $v_6 = +0.02$

[Ba(C<sub>5</sub>F<sub>5</sub>)<sub>2</sub>]

**Deformation Densities**

**(C<sub>5</sub>F<sub>5</sub>)<sub>2</sub><sup>2-</sup> orbitals**

**Ba<sup>2+</sup> orbitals**

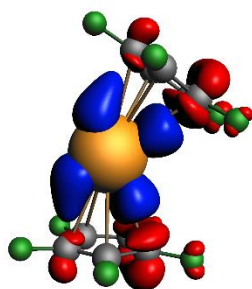

$\Delta E_1 = -25.7$ ;  $|v_1| = 0.48$

$\Delta E_2 = -22.6$ ;  $|v_2| = 0.43$

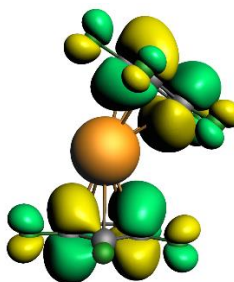

HOMO ( $\epsilon = 0.45$  eV)  $v_1 = -0.2$

HOMO ( $\epsilon = 0.45$  eV)  $v_2 = -0.16$

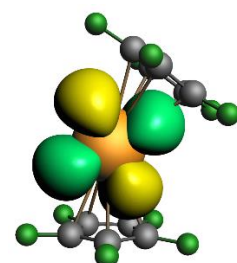

LUMO ( $\epsilon = -12.82$  eV)  $v_1 = +0.21$

LUMO ( $\epsilon = -12.82$  eV)  $v_2 = +0.19$

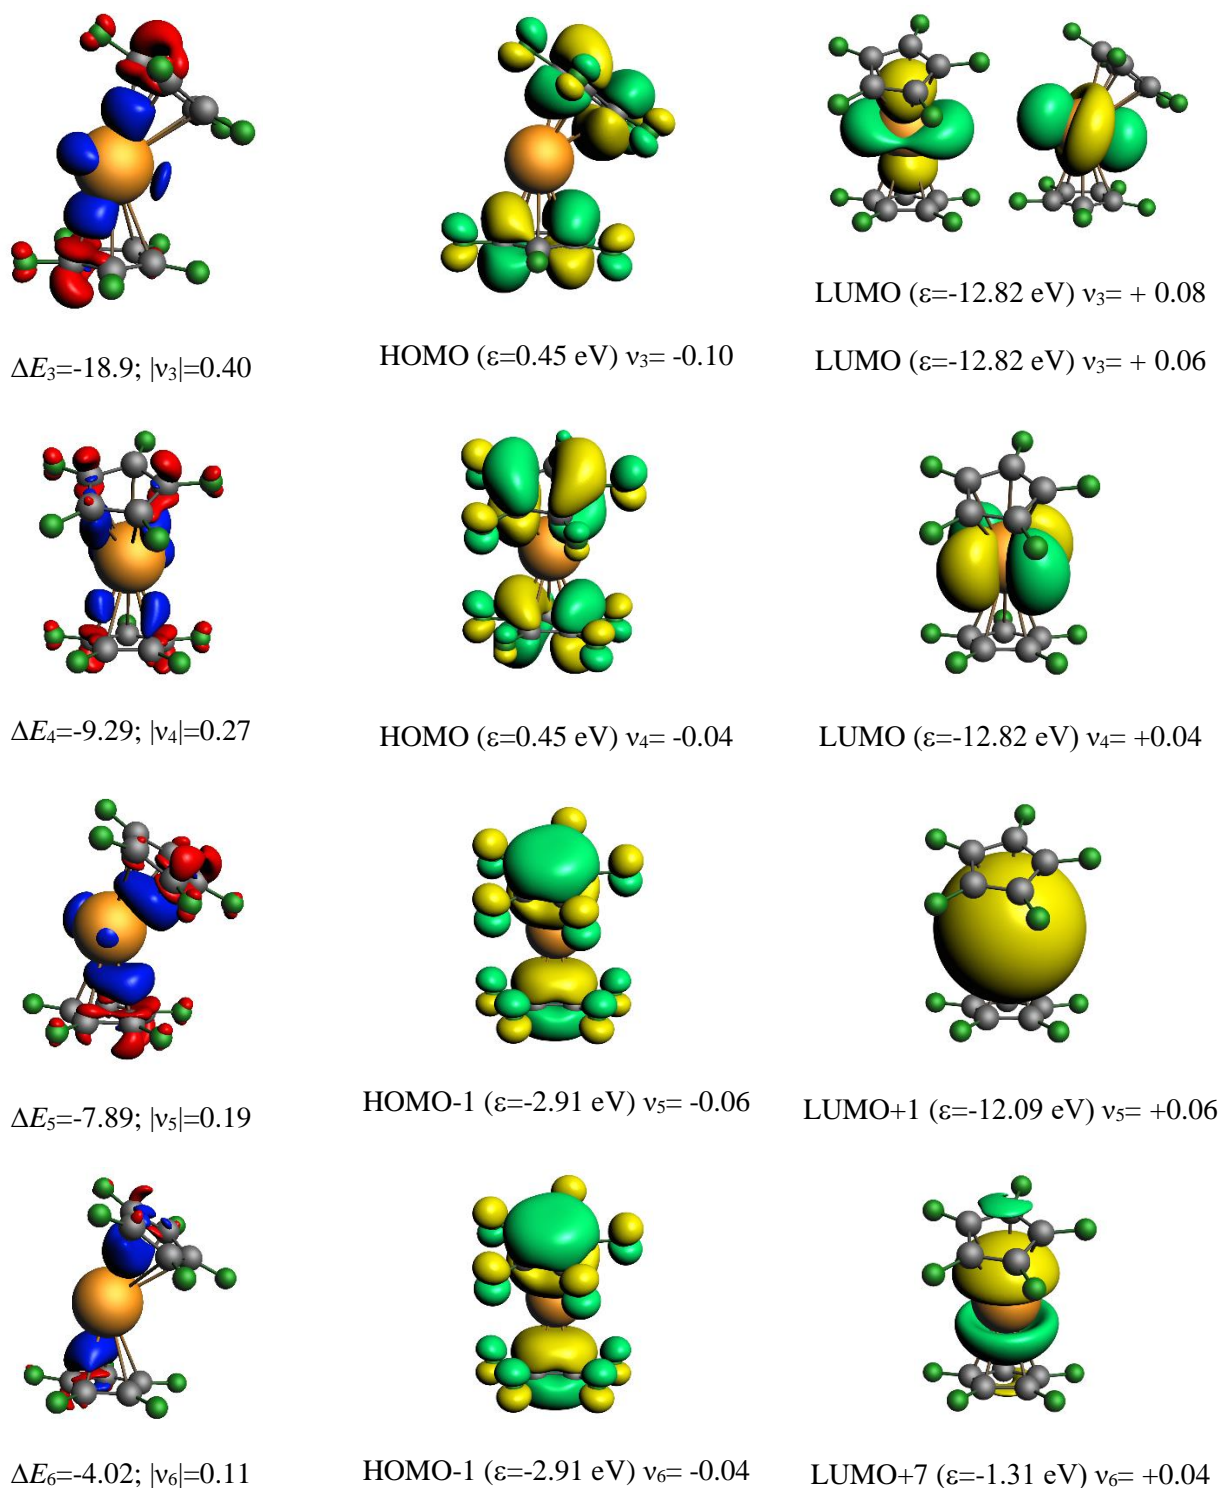

**Figure S3.** Plot of deformation densities (isovalue = 0.003) of the pairwise orbital interaction and shape of the most important occupied and vacant orbitals (isovalue = 0.03) in  $[\text{Ae}(\text{C}_5\text{F}_5)_2]$  ( $\text{Ae} = \text{Be}-\text{Ba}$ ) with the orbital interaction energies  $\Delta E_{\text{orb}}$  (in kcal/mol) and their eigenvalues  $v$  (in e). The direction of the charge flow is red  $\rightarrow$  blue. The eigenvalues  $v$  indicate the amount of donated (negative numbers) and accepted charge (positive numbers). The occupied orbitals are shown in yellow and blue for the different phases, while the unoccupied orbitals are in cyan and orange.

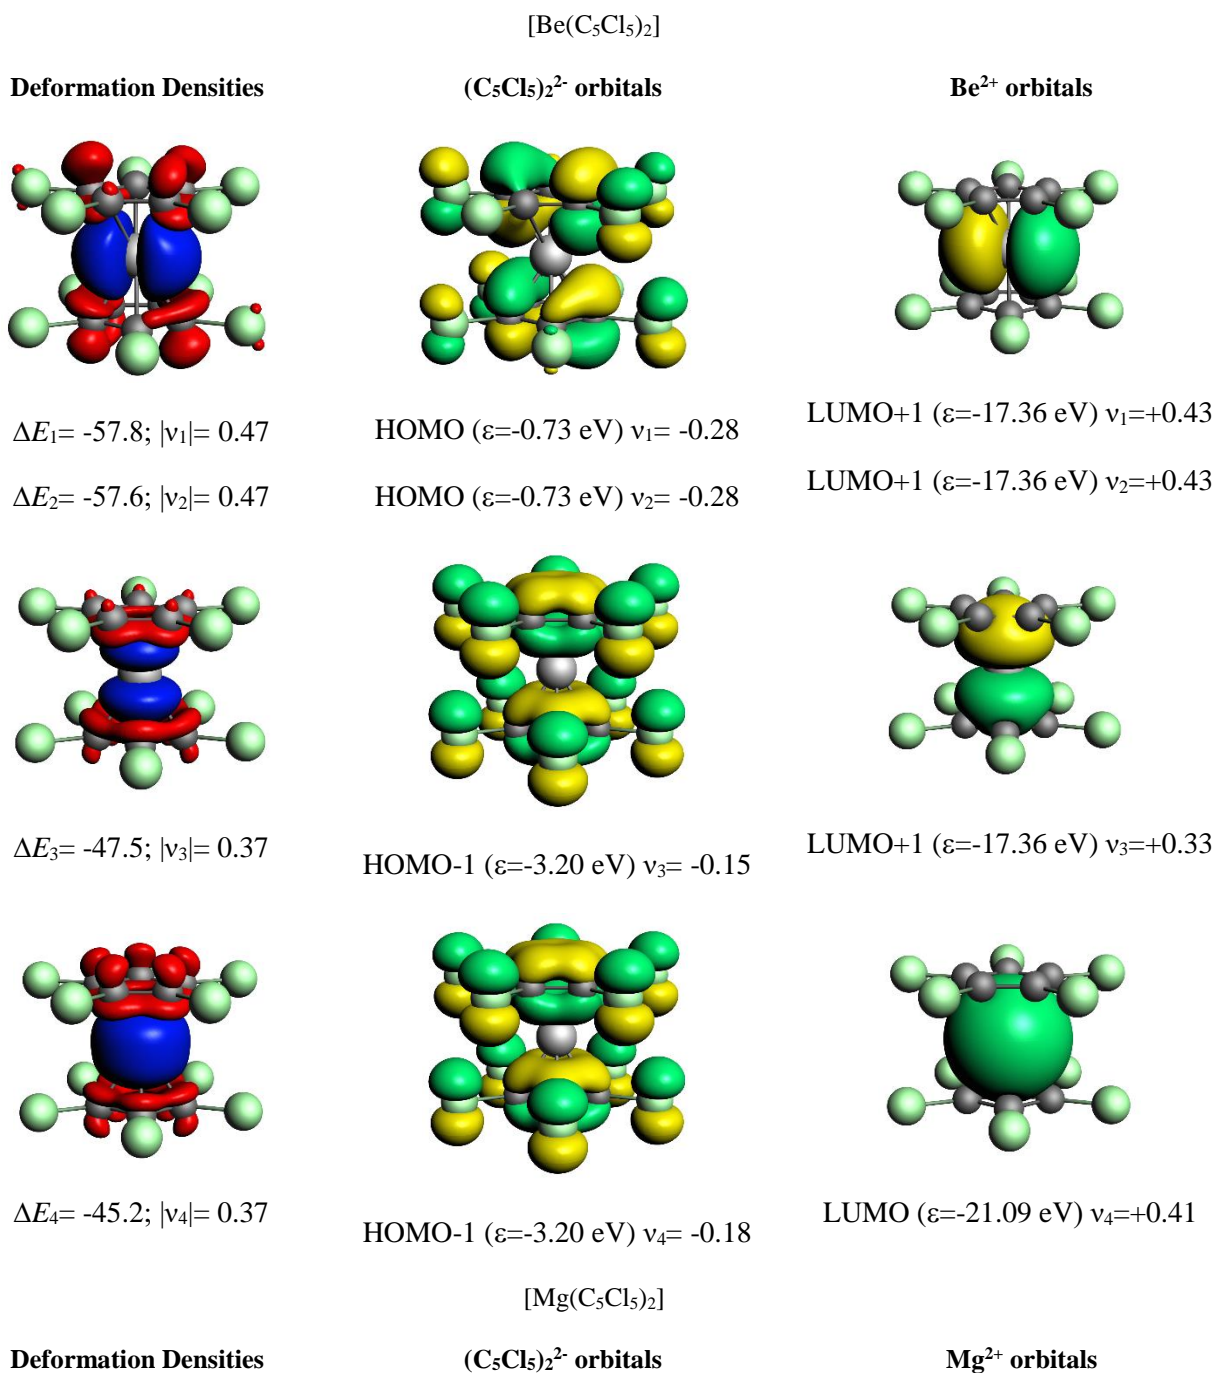



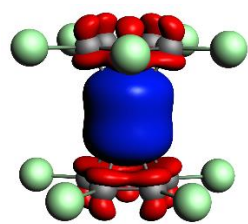

$\Delta E_1 = -27.6$ ;  $|v_1| = 0.33$

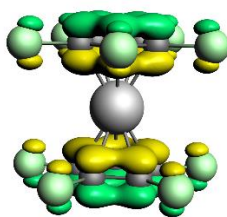

HOMO-6 ( $\epsilon = -6.68$  eV)  $v_1 = -0.18$

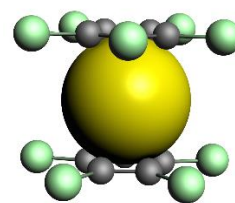

LUMO ( $\epsilon = -17.85$  eV)  $v_1 = +0.34$

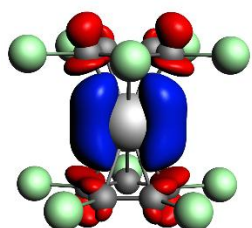

$\Delta E_2 = -19.4$ ;  $|v_2| = 0.28$

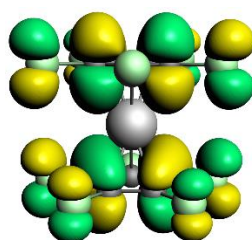

HOMO ( $\epsilon = -0.75$  eV)  $v_2 = -0.16$

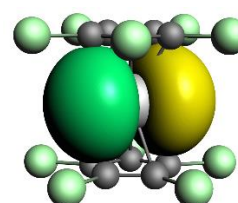

LUMO+1 ( $\epsilon = -12.64$  eV)  $v_2 = +0.18$

$\Delta E_3 = -19.4$ ;  $|v_3| = 0.28$

HOMO ( $\epsilon = -0.75$  eV)  $v_3 = -0.16$

LUMO+1 ( $\epsilon = -12.64$  eV)  $v_3 = +0.18$

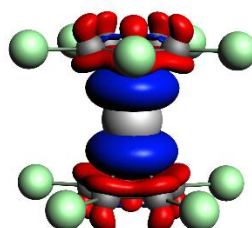

$\Delta E_4 = -17.3$ ;  $|v_4| = 0.22$

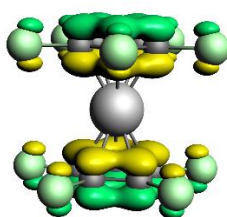

HOMO-6 ( $\epsilon = -6.68$  eV)  $v_4 = -0.08$

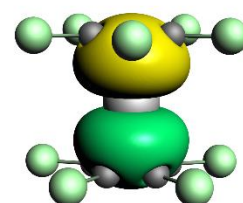

LUMO+1 ( $\epsilon = -12.64$  eV)  $v_4 = +0.19$

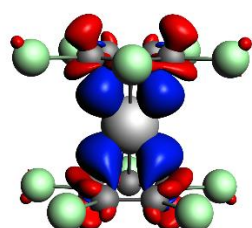

$\Delta E_5 = -13.6$ ;  $|v_5| = 0.18$

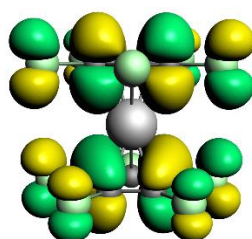

HOMO ( $\epsilon = -0.75$  eV)  $v_5 = -0.06$

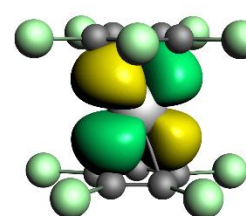

LUMO+3 ( $\epsilon = -3.04$  eV)  $v_5 = +0.06$

$\Delta E_6 = -13.6$ ;  $|v_6| = 0.18$

HOMO ( $\epsilon = -0.75$  eV)  $v_6 = -0.06$

LUMO+3 ( $\epsilon = -3.04$  eV)  $v_6 = +0.06$

[Ca(C<sub>5</sub>Cl<sub>5</sub>)<sub>2</sub>]

**Deformation Densities**

**(C<sub>5</sub>Cl<sub>5</sub>)<sub>2</sub><sup>2-</sup> orbitals**

**Ca<sup>2+</sup> orbitals**

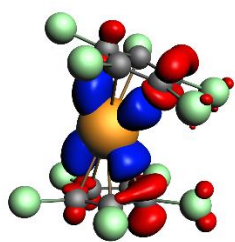

$\Delta E_1 = -31.0$ ;  $|v_1| = 0.48$

$\Delta E_2 = -28.2$ ;  $|v_2| = 0.46$

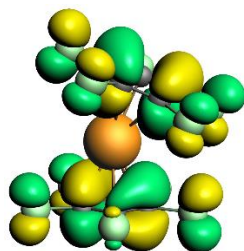

HOMO ( $\epsilon = -0.79$  eV)  $v_1 = -0.19$

HOMO ( $\epsilon = -0.79$  eV)  $v_2 = -0.17$

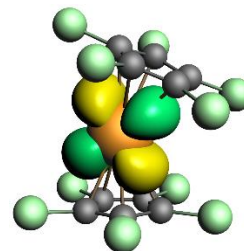

LUMO ( $\epsilon = -15.91$  eV)  $v_1 = +0.21$

LUMO ( $\epsilon = -15.91$  eV)  $v_2 = +0.19$

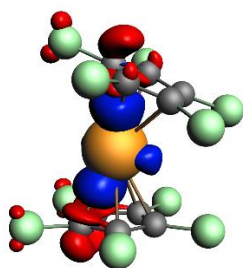

$\Delta E_3 = -19.8$ ;  $|v_3| = 0.35$

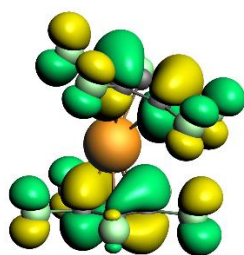

HOMO ( $\epsilon = -0.79$  eV)  $v_3 = -0.08$

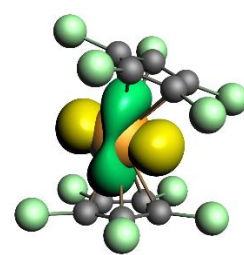

LUMO ( $\epsilon = -15.91$  eV)  $v_3 = +0.10$

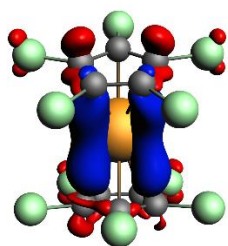

$\Delta E_4 = -8.5$ ;  $|v_4| = 0.21$

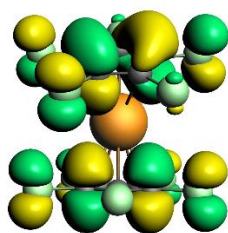

HOMO ( $\epsilon = -0.79$  eV)  $v_4 = -0.04$

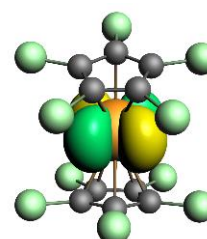

LUMO ( $\epsilon = -15.91$  eV)  $v_4 = +0.03$

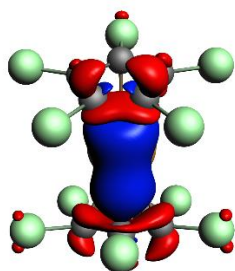

$\Delta E_5 = -9.1$ ;  $|v_5| = 0.19$

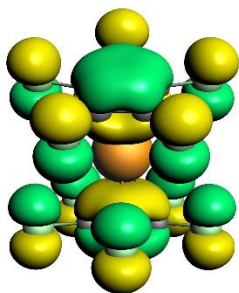

HOMO-1 ( $\epsilon = -3.25$  eV)  $v_5 = -0.02$

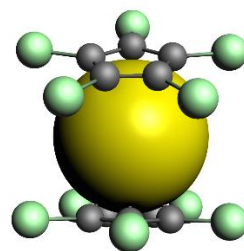

LUMO+1 ( $\epsilon = -14.24$  eV)  $v_5 = +0.07$

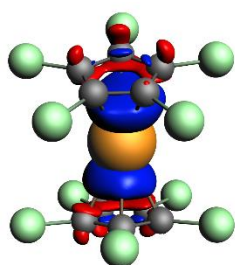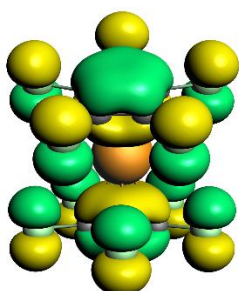

LUMO+2 ( $\epsilon = -10.53$  eV)  $v_6 = +0.06$

$\Delta E_6 = -6.1$ ;  $|v_6| = 0.12$

HOMO-1 ( $\epsilon = -3.25$  eV)  $v_6 = -0.02$

[Sr(C<sub>5</sub>Cl<sub>5</sub>)<sub>2</sub>]

**Deformation Densities**

**(C<sub>5</sub>Cl<sub>5</sub>)<sub>2</sub><sup>2-</sup> orbitals**

**Sr<sup>2+</sup> orbitals**

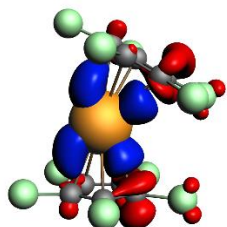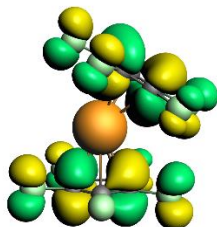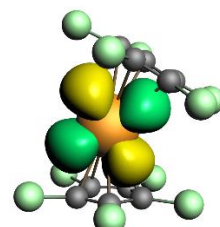

$\Delta E_7 = -24.3$ ;  $|v_1| = 0.42$

HOMO ( $\epsilon = -0.80$  eV)  $v_1 = -0.16$

LUMO ( $\epsilon = -13.22$  eV)  $v_1 = +0.20$

$\Delta E_2 = -21.7$ ;  $|v_2| = 0.39$

HOMO ( $\epsilon = -0.80$  eV)  $v_2 = -0.12$

LUMO ( $\epsilon = -13.22$  eV)  $v_2 = +0.17$

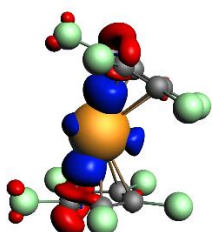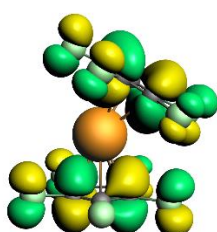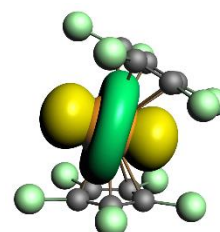

$\Delta E_3 = -18.0$ ;  $|v_3| = 0.35$

HOMO ( $\epsilon = -0.80$  eV)  $v_3 = -0.08$

LUMO ( $\epsilon = -13.22$  eV)  $v_3 = +0.08$

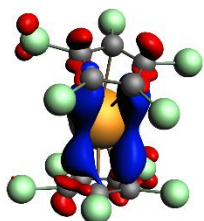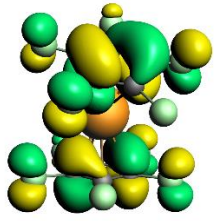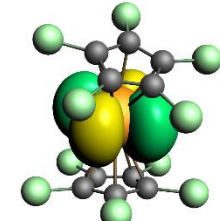

$\Delta E_4 = -7.6$ ;  $|v_4| = 0.21$

HOMO ( $\epsilon = -0.80$  eV)  $v_4 = -0.04$

LUMO ( $\epsilon = -13.22$  eV)  $v_4 = +0.04$

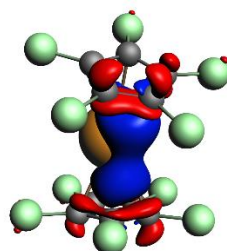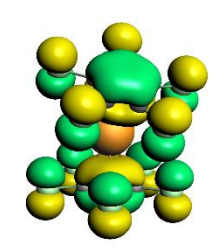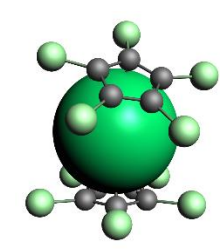

$\Delta E_5 = -8.2$ ;  $|v_5| = 0.18$

HOMO-1 ( $\epsilon = -3.26$  eV)  $v_5 = -0.02$

LUMO ( $\epsilon = -13.22$  eV)  $v_5 = +0.06$

[Ba(C<sub>5</sub>Cl<sub>5</sub>)<sub>2</sub>]

**Deformation Densities**

**(C<sub>5</sub>Cl<sub>5</sub>)<sub>2</sub><sup>2-</sup> orbitals**

**Ba<sup>2+</sup> orbitals**

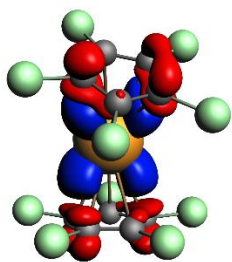

$\Delta E_1 = -22.1$ ;  $|v_1| = 0.42$

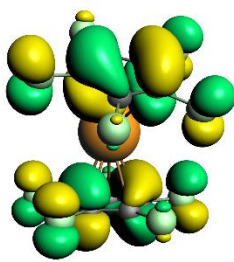

HOMO ( $\epsilon = -0.81$  eV)  $v_1 = -0.16$

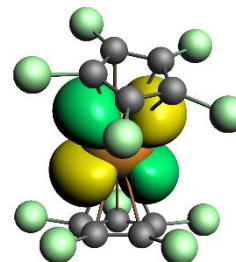

LUMO ( $\epsilon = -12.82$  eV)  $v_1 = +0.19$

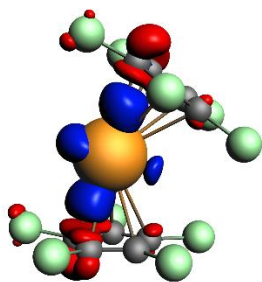

$\Delta E_2 = -18.6$ ;  $|v_2| = 0.39$

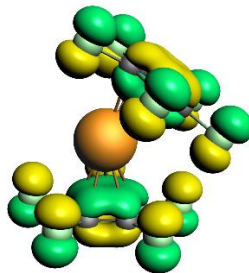

HOMO-1 ( $\epsilon = -3.27$  eV)  $v_2 = -0.04$

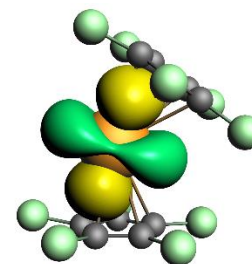

LUMO ( $\epsilon = -12.82$  eV)  $v_2 = +0.17$

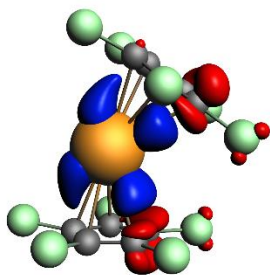

$\Delta E_3 = -19.2$ ;  $|v_3| = 0.37$

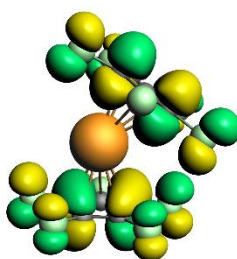

HOMO ( $\epsilon = -0.81$  eV)  $v_3 = -0.10$

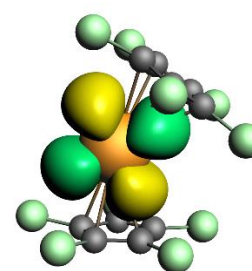

LUMO ( $\epsilon = -12.82$  eV)  $v_3 = +0.16$

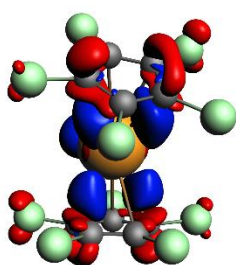

$\Delta E_4 = -8.8$ ;  $|v_4| = 0.26$

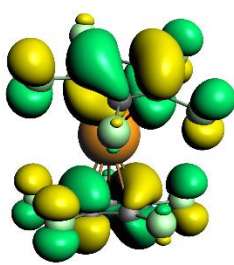

HOMO ( $\epsilon = -0.81$  eV)  $v_4 = -0.04$

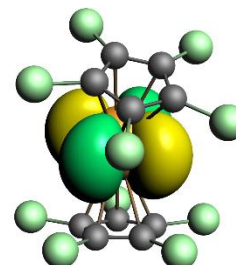

LUMO ( $\epsilon = -12.82$  eV)  $v_4 = +0.05$

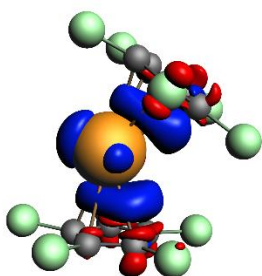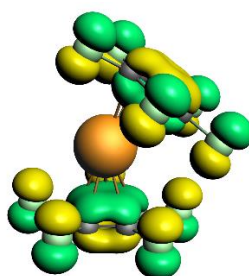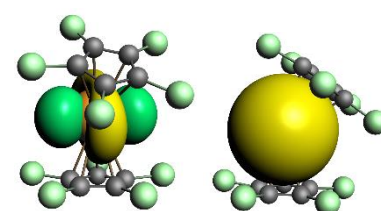

LUMO ( $\epsilon = -12.82$  eV)  $v_5 = +0.03$

$$\Delta E_5 = -7.2; |v_5| = 0.19$$

$$\text{HOMO-1 } (\epsilon = -3.27 \text{ eV}) v_5 = -0.02$$

$$\text{LUMO+1 } (\epsilon = -12.09 \text{ eV}) v_5 = +0.03$$

**Figure S4.** Plot of deformation densities (isovalue = 0.003) of the pairwise orbital interaction and shape of the most important occupied and vacant orbitals (isovalue = 0.03) in  $[\text{Ae}(\text{C}_5\text{Cl}_5)_2]$  (Ae=Be-Ba) with the orbital interaction energies  $\Delta E_{\text{orb}}$  (in kcal/mol) and their eigenvalues  $v$  (in e). The direction of the charge flow is red  $\rightarrow$  blue. The eigenvalues  $v$  indicate the amount of donated (negative numbers) and accepted charge (positive numbers). The occupied orbitals are shown in yellow and blue for the different phases, while the unoccupied orbitals are in cyan and orange.

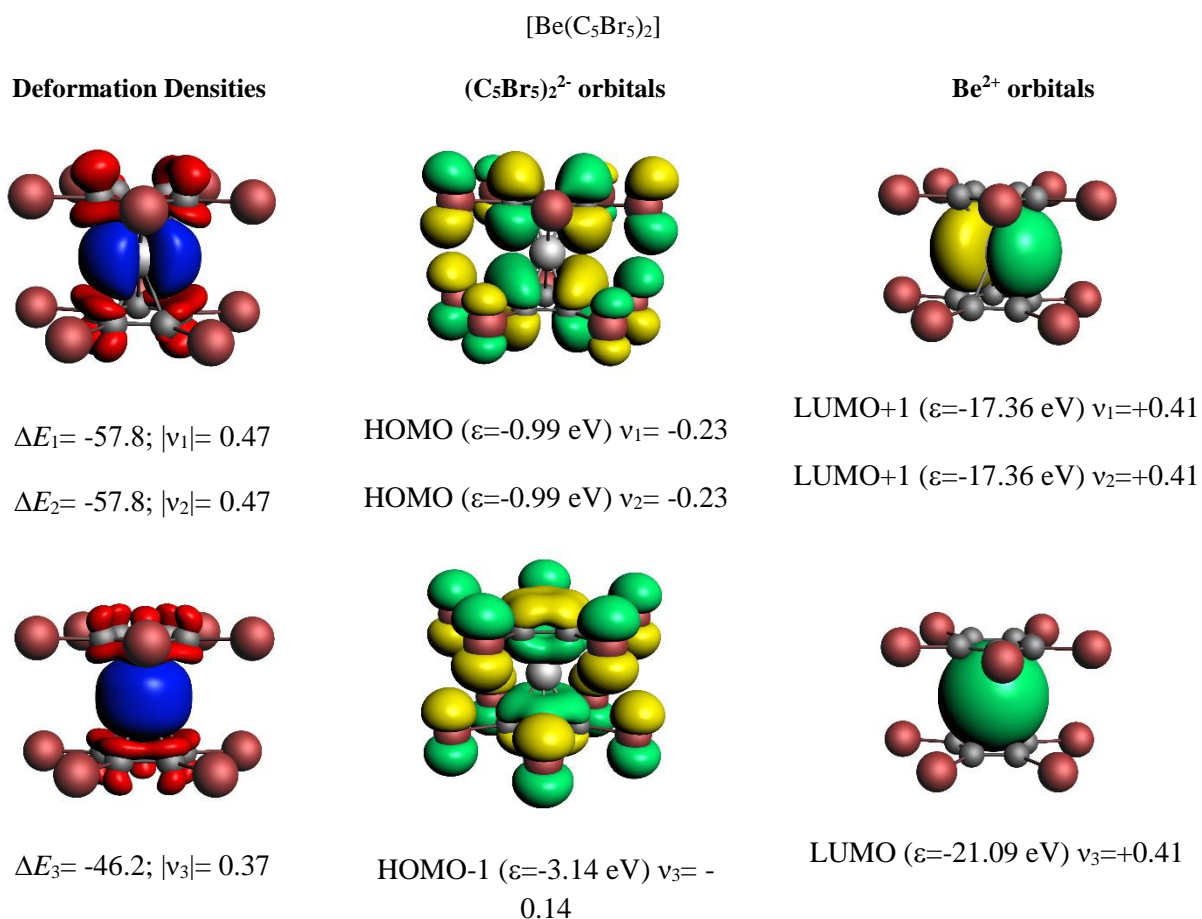

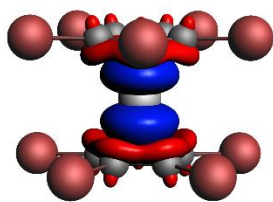

$\Delta E_4 = -47.2$ ;  $|v_4| = 0.37$

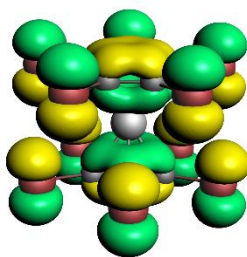

HOMO-1 ( $\epsilon = -3.14$  eV)  $v_4 = -0.12$

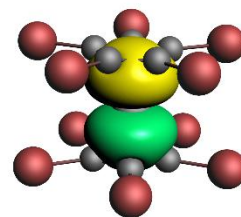

LUMO+1 ( $\epsilon = -17.36$  eV)  $v_4 = +0.33$

**Deformation Densities**

**[Mg(C<sub>5</sub>Br<sub>5</sub>)<sub>2</sub>]**

**(C<sub>5</sub>Br<sub>5</sub>)<sub>2</sub><sup>2-</sup> orbitals**

**Mg<sup>2+</sup> orbitals**

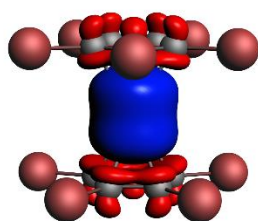

$\Delta E_1 = -27.6$ ;  $|v_1| = 0.33$

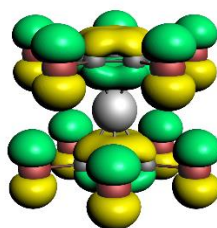

HOMO-1 ( $\epsilon = -3.16$  eV)  $v_1 = -0.08$

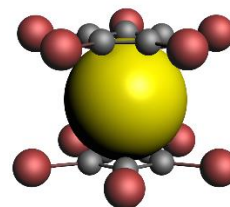

LUMO ( $\epsilon = -17.8$  eV)  $v_1 = +0.35$

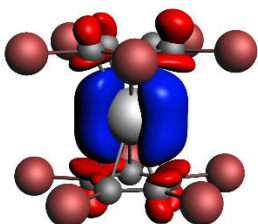

$\Delta E_2 = -20.1$ ;  $|v_2| = 0.29$

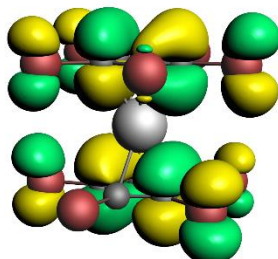

HOMO ( $\epsilon = -1.01$  eV)  $v_2 = -0.14$

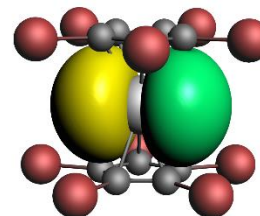

LUMO+1 ( $\epsilon = -12.64$  eV)  $v_2 = +0.24$

$\Delta E_3 = -20.1$ ;  $|v_3| = 0.29$

HOMO ( $\epsilon = -1.01$  eV)  $v_3 = -0.14$

LUMO+1 ( $\epsilon = -12.64$  eV)  $v_3 = +0.24$

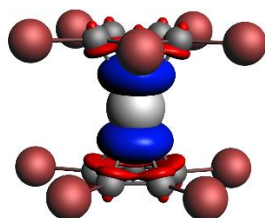

$\Delta E_4 = -17.4$ ;  $|v_4| = 0.21$

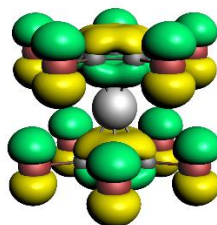

HOMO-1 ( $\epsilon = -3.16$  eV)  $v_4 = -0.08$

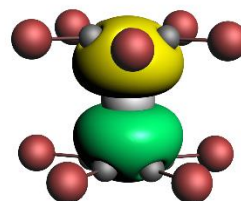

LUMO+1 ( $\epsilon = -12.64$  eV)  $v_4 = +0.18$

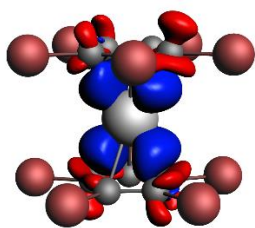

$$\Delta E_5 = -14.1; |v_5| = 0.19$$

$$\Delta E_6 = -14.0; |v_6| = 0.19$$

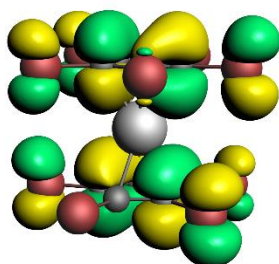

$$\text{HOMO } (\epsilon = -1.01 \text{ eV}) v_5 = -0.06$$

$$\text{HOMO } (\epsilon = -1.01 \text{ eV}) v_6 = -0.06$$

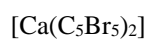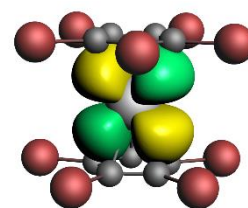

$$\text{LUMO}+4 (\epsilon = -3.04 \text{ eV}) v_5 = +0.08$$

$$\text{LUMO}+4 (\epsilon = -3.04 \text{ eV}) v_6 = +0.08$$

**Deformation Densities**

**(C<sub>5</sub>Br<sub>5</sub>)<sub>2</sub><sup>2-</sup> orbitals**

**Ca<sup>2+</sup> orbitals**

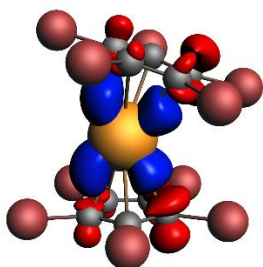

$$\Delta E_1 = -30.6; |v_1| = 0.47$$

$$\Delta E_2 = -28.5; |v_2| = 0.45$$

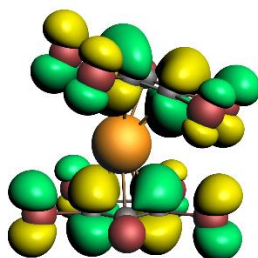

$$\text{HOMO } (\epsilon = -1.04 \text{ eV}) v_1 = -0.2$$

$$\text{HOMO } (\epsilon = -1.04 \text{ eV}) v_2 = -0.18$$

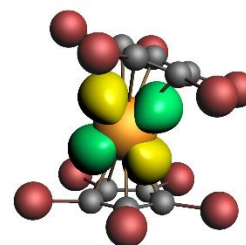

$$\text{LUMO } (\epsilon = -15.91 \text{ eV}) v_1 = +0.21$$

$$\text{LUMO } (\epsilon = -15.91 \text{ eV}) v_2 = +0.19$$

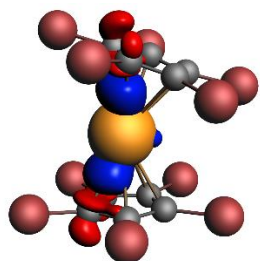

$$\Delta E_3 = -19.3; |v_3| = 0.33$$

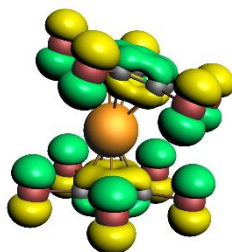

$$\text{HOMO-1 } (\epsilon = -3.18 \text{ eV}) v_3 = -0.06$$

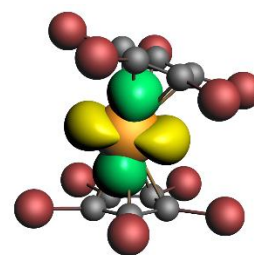

$$\text{LUMO } (\epsilon = -15.91 \text{ eV}) v_3 = +0.11$$

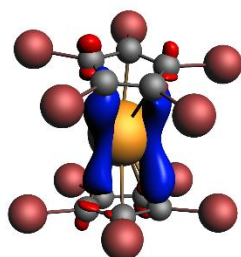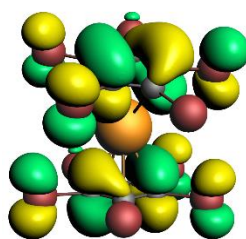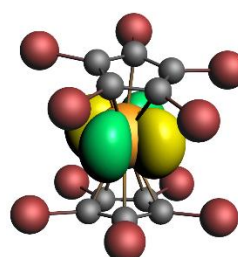

$\Delta E_4 = -8.5$ ;  $|v_4| = 0.21$

HOMO ( $\epsilon = -1.04$  eV)  $v_4 = -0.04$

LUMO ( $\epsilon = -15.91$  eV)  $v_4 = +0.03$

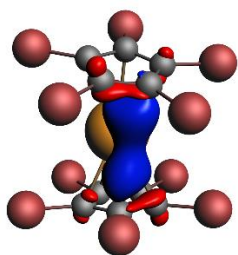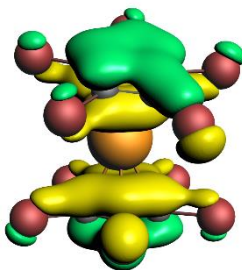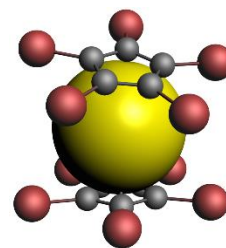

$\Delta E_5 = -9.0$ ;  $|v_5| = 0.20$

HOMO-6 ( $\epsilon = -6.47$  eV)  $v_5 = -0.04$

LUMO+1 ( $\epsilon = -14.24$  eV)  $v_5 = +0.05$

[Sr(C<sub>5</sub>Br<sub>5</sub>)<sub>2</sub>]

**Deformation Densities**

**(C<sub>5</sub>Br<sub>5</sub>)<sub>2</sub><sup>2-</sup> orbitals**

**Sr<sup>2+</sup> orbitals**

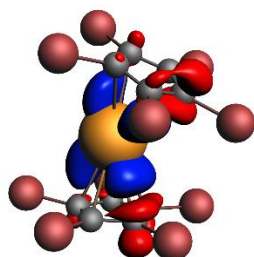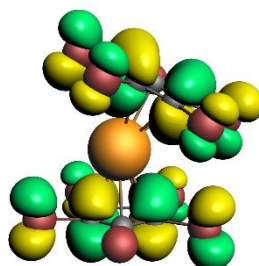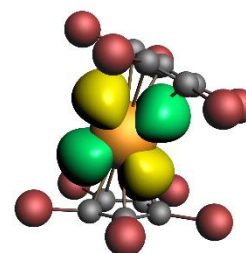

$\Delta E_1 = -24.0$ ;  $|v_1| = 0.41$

HOMO ( $\epsilon = -1.05$  eV)  $v_1 = -0.16$

LUMO ( $\epsilon = -13.22$  eV)  $v_1 = +0.20$

$\Delta E_2 = -21.6$ ;  $|v_2| = 0.39$

HOMO ( $\epsilon = -1.05$  eV)  $v_2 = -0.12$

LUMO ( $\epsilon = -13.22$  eV)  $v_2 = +0.17$

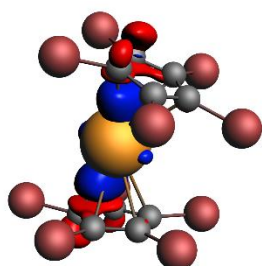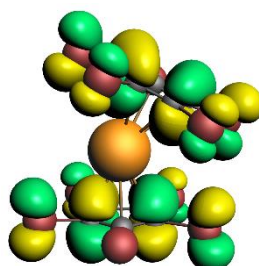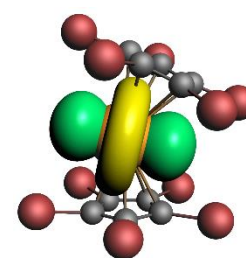

$\Delta E_3 = -17.7$ ;  $|v_3| = 0.34$

HOMO ( $\epsilon = -1.05$  eV)  $v_3 = -0.08$

LUMO ( $\epsilon = -13.22$  eV)  $v_3 = +0.07$

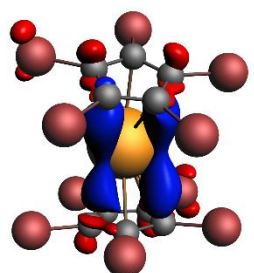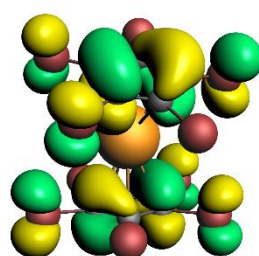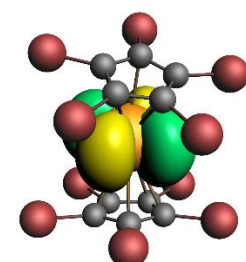

$\Delta E_4 = -7.7$ ;  $|v_4| = 0.21$

HOMO ( $\epsilon = -1.05$  eV)  $v_4 = -0.02$

LUMO ( $\epsilon = -13.22$  eV)  $v_4 = +0.04$



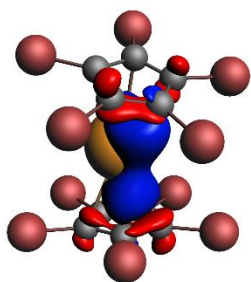

$\Delta E_5 = -8.3$ ;  $|v_5| = 0.19$

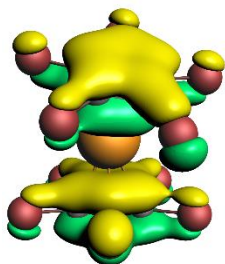

HOMO-6 ( $\epsilon = -6.49$  eV)  $v_5 = -0.05$

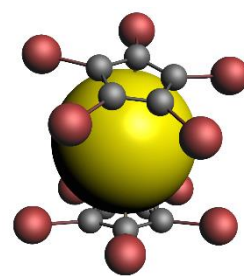

LUMO ( $\epsilon = -13.22$  eV)  $v_5 = +0.05$

[Ba(C<sub>5</sub>Br<sub>5</sub>)<sub>2</sub>]

**Deformation Densities**

**(C<sub>5</sub>Br<sub>5</sub>)<sub>2</sub><sup>2-</sup> orbitals**

**Ba<sup>2+</sup> orbitals**

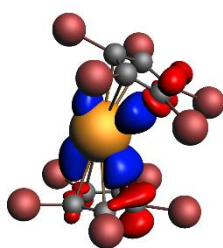

$\Delta E_1 = -21.8$ ;  $|v_1| = 0.41$

$\Delta E_2 = -19.4$ ;  $|v_2| = 0.37$

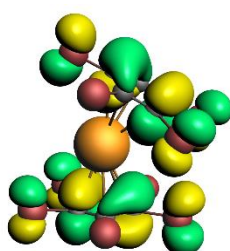

HOMO ( $\epsilon = -1.05$  eV)  $v_1 = -0.12$

HOMO ( $\epsilon = -1.05$  eV)  $v_2 = -0.09$

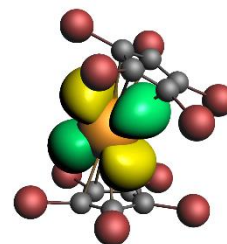

LUMO ( $\epsilon = -12.82$  eV)  $v_1 = +0.18$

LUMO ( $\epsilon = -12.82$  eV)  $v_2 = +0.16$

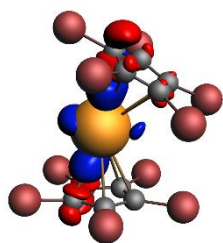

$\Delta E_3 = -17.8$ ;  $|v_3| = 0.37$

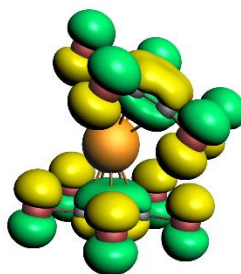

HOMO-1 ( $\epsilon = -3.12$  eV)  $v_3 = -0.03$

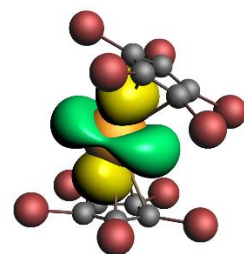

LUMO ( $\epsilon = -12.82$  eV)  $v_3 = +0.15$

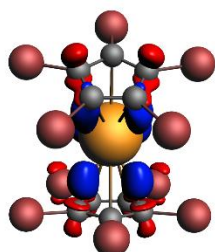

$\Delta E_4 = -8.5$ ;  $|v_4| = 0.25$

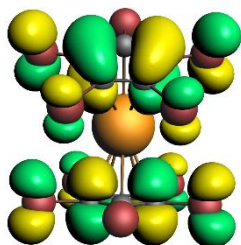

HOMO ( $\epsilon = -1.05$  eV)  $v_4 = -0.04$

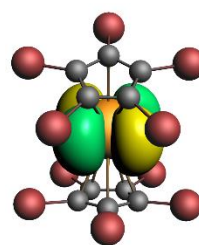

LUMO ( $\epsilon = -12.82$  eV)  $v_4 = +0.05$

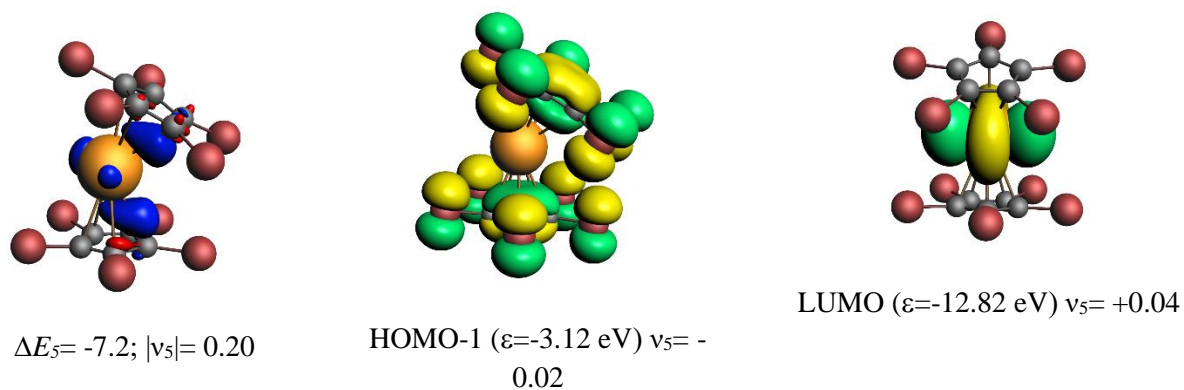

**Figure S5.** Plot of deformation densities (isovalue = 0.003) of the pairwise orbital interaction and shape of the most important occupied and vacant orbitals (isovalue = 0.03) in  $[\text{Ae}(\text{C}_5\text{Br}_5)_2]$  (Ae=Be-Ba) with the orbital interaction energies  $\Delta E_{\text{orb}}$  (in kcal/mol) and their eigenvalues  $v$  (in e). The direction of the charge flow is red→blue. The eigenvalues  $v$  indicate the amount of donated (negative numbers) and accepted charge (positive numbers). The occupied orbitals are shown in yellow and blue for the different phases, while the unoccupied orbitals are in cyan and orange.

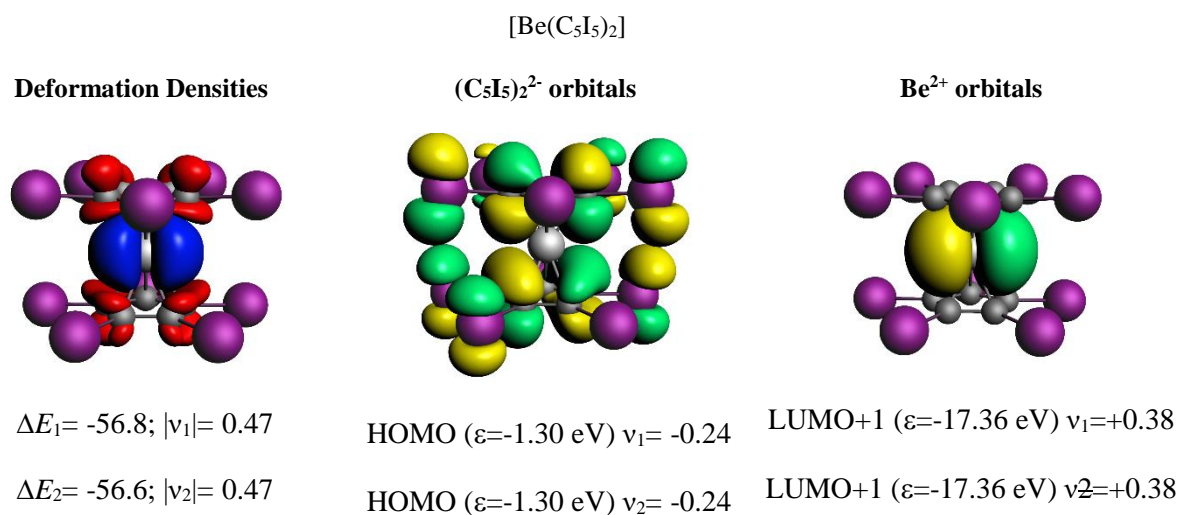

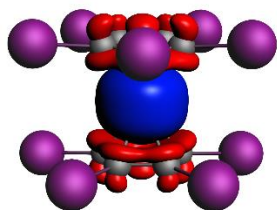

$\Delta E_3 = -46.6$ ;  $|v_3| = 0.38$

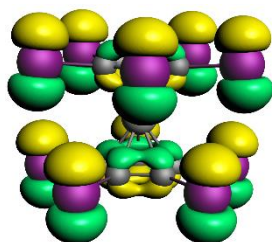

HOMO-2 ( $\epsilon = -3.05$  eV)  $v_3 = -0.10$

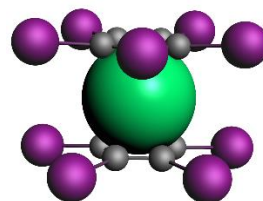

LUMO ( $\epsilon = -21.09$  eV)  $v_3 = +0.42$

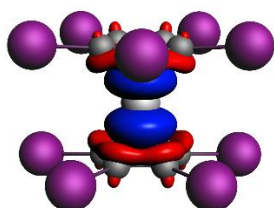

$\Delta E_4 = -46.8$ ;  $|v_4| = 0.37$

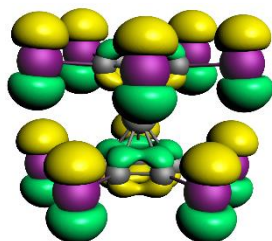

HOMO-2 ( $\epsilon = -3.05$  eV)  $v_4 = -0.08$

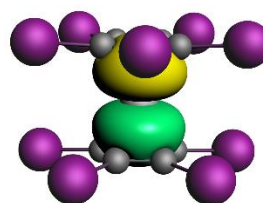

LUMO+1 ( $\epsilon = -17.36$  eV)  $v_4 = +0.32$

[Mg(C<sub>5</sub>I<sub>5</sub>)<sub>2</sub>]

**Deformation Densities**

**(C<sub>5</sub>I<sub>5</sub>)<sub>2</sub><sup>2-</sup> orbitals**

**Mg<sup>2+</sup> orbitals**

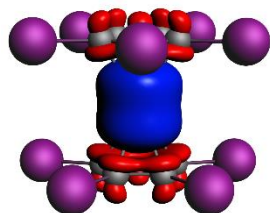

$\Delta E_1 = -27.6$ ;  $|v_1| = 0.33$

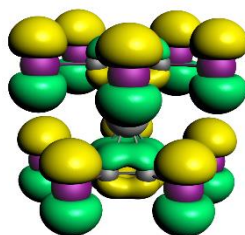

HOMO-2 ( $\epsilon = -3.07$  eV)  $v_1 = -0.04$

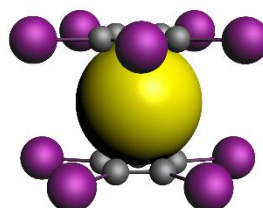

LUMO ( $\epsilon = -17.8$  eV)  $v_1 = +0.33$

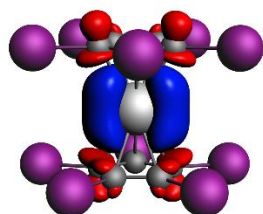

$\Delta E_2 = -20.2$ ;  $|v_2| = 0.29$

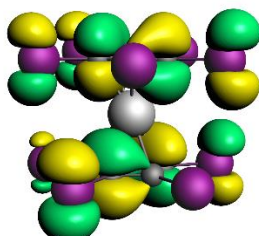

HOMO ( $\epsilon = -1.32$  eV)  $v_2 = -0.08$

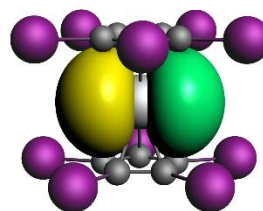

LUMO+1 ( $\epsilon = -12.64$  eV)  $v_2 = +0.23$

$\Delta E_3 = -20.1$ ;  $|v_3| = 0.29$

HOMO ( $\epsilon = -1.32$  eV)  $v_3 = -0.08$

LUMO+1 ( $\epsilon = -12.64$  eV)  $v_3 = +0.23$

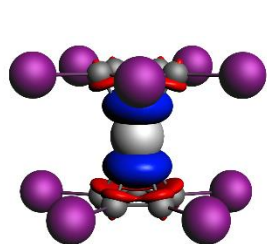

$\Delta E_4 = -17.5$ ;  $|v_4| = 0.21$

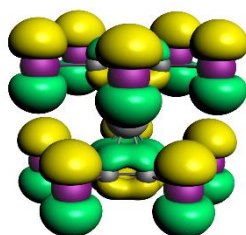

HOMO-2 ( $\epsilon = -3.07$  eV)  $v_4 = -0.04$

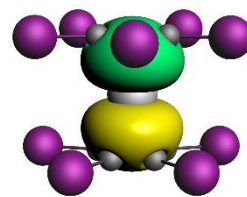

LUMO+1 ( $\epsilon = -12.64$  eV)  $v_4 = +0.24$

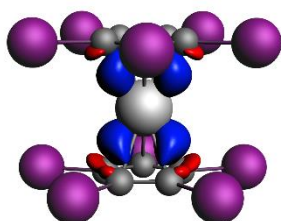

$\Delta E_5 = -14.4$ ;  $|v_5| = 0.19$

$\Delta E_6 = -14.3$ ;  $|v_6| = 0.19$

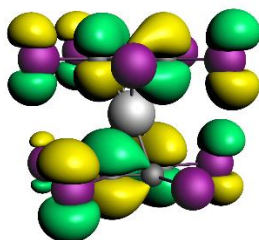

HOMO ( $\epsilon = -1.32$  eV)  $v_5 = -0.04$

HOMO ( $\epsilon = -1.32$  eV)  $v_6 = -0.04$

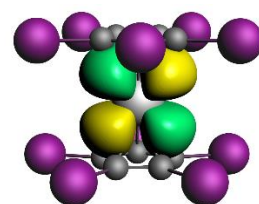

LUMO+3 ( $\epsilon = -3.04$  eV)  $v_5 = +0.08$

LUMO+3 ( $\epsilon = -3.04$  eV)  $v_6 = +0.08$

[Ca(C<sub>5</sub>I<sub>5</sub>)<sub>2</sub>]

**Deformation Densities**

**(C<sub>5</sub>I<sub>5</sub>)<sub>2</sub><sup>2-</sup> orbitals**

**Ca<sup>2+</sup> orbitals**

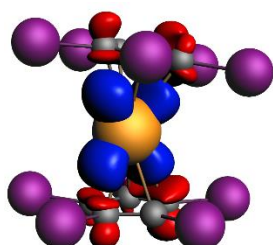

$\Delta E_1 = -30.5$ ;  $|v_1| = 0.46$

$\Delta E_2 = -29.6$ ;  $|v_2| = 0.45$

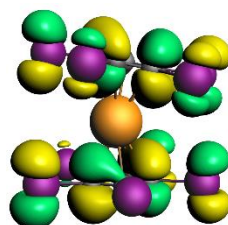

HOMO ( $\epsilon = -1.33$  eV)  $v_1 = -0.18$

HOMO ( $\epsilon = -1.33$  eV)  $v_2 = -0.16$

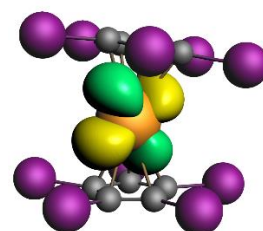

LUMO ( $\epsilon = -15.91$  eV)  $v_1 = +0.20$

LUMO ( $\epsilon = -15.91$  eV)  $v_2 = +0.19$

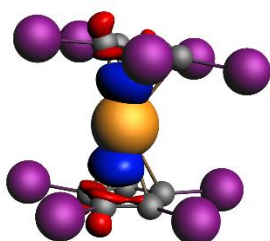

$\Delta E_3 = -17.7$ ;  $|v_3| = 0.31$

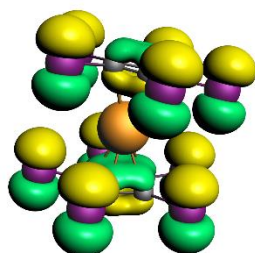

HOMO-2 ( $\epsilon = -3.07$  eV)  $v_3 = -0.06$

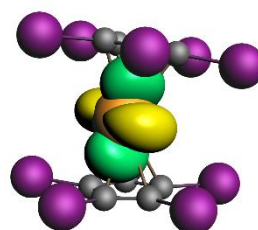

LUMO ( $\epsilon = -15.91$  eV)  $v_3 = +0.07$

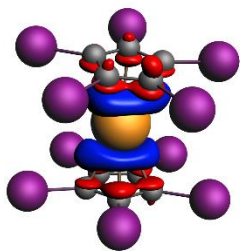

$$\Delta E_4 = -7.7; |v_5| = 0.17$$

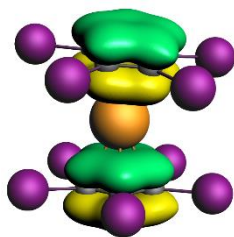

$$\text{HOMO-9 } (\epsilon = -6.35 \text{ eV}) v_4 = -0.1$$

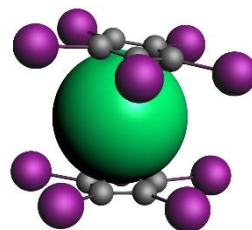

$$\text{LUMO+1 } (\epsilon = -14.24 \text{ eV}) v_4 = +0.12$$

[Sr(C<sub>5</sub>I<sub>5</sub>)<sub>2</sub>]

**Deformation Densities**

**(C<sub>5</sub>I<sub>5</sub>)<sub>2</sub><sup>2-</sup> orbitals**

**Sr<sup>2+</sup> orbitals**

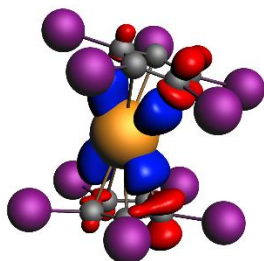

$$\Delta E_1 = -23.6; |v_1| = 0.40$$

$$\Delta E_2 = -22.1; |v_2| = 0.38$$

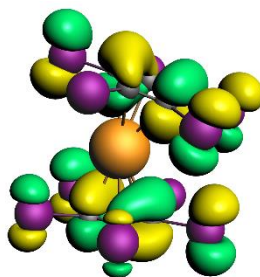

$$\text{HOMO } (\epsilon = -1.33 \text{ eV}) v_1 = -0.14$$

$$\text{HOMO } (\epsilon = -1.33 \text{ eV}) v_2 = -0.10$$

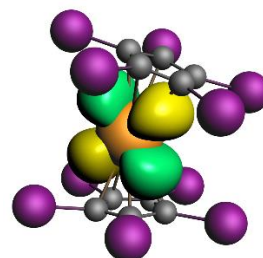

$$\text{LUMO } (\epsilon = -13.22 \text{ eV}) v_1 = +0.19$$

$$\text{LUMO } (\epsilon = -13.22 \text{ eV}) v_2 = +0.18$$

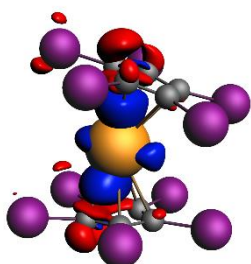

$$\Delta E_3 = -17.0; |v_3| = 0.33$$

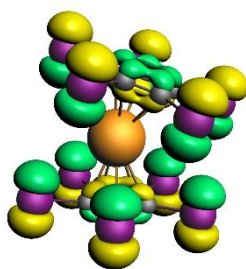

$$\text{HOMO-2 } (\epsilon = -3.08 \text{ eV}) v_3 = -0.06$$

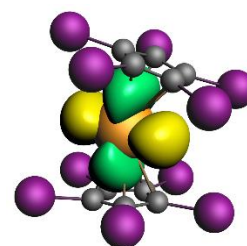

$$\text{LUMO } (\epsilon = -13.22 \text{ eV}) v_3 = +0.11$$

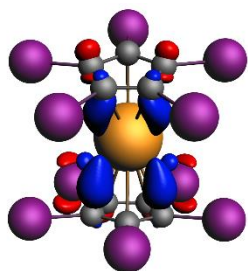

$$\Delta E_4 = -7.9; |v_4| = 0.22$$

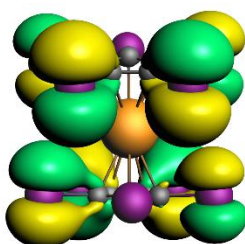

$$\text{LUMO } (\epsilon = -13.22 \text{ eV}) v_4 = +0.04$$

HOMO-4 ( $\epsilon=-3.40$  eV)  $v_4=-0.03$

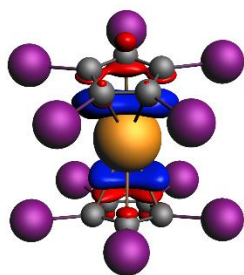

$\Delta E_5 = -7.3$ ;  $|v_5| = 0.18$

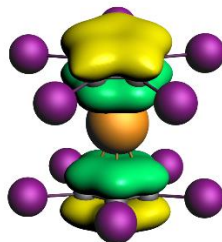

HOMO-9 ( $\epsilon=-6.36$  eV)  $v_5=-0.08$

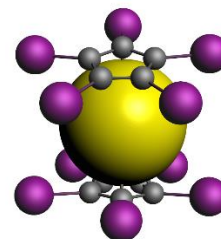

LUMO ( $\epsilon=-13.22$  eV)  $v_5=+0.11$

[Ba(C<sub>5</sub>I<sub>5</sub>)<sub>2</sub>]

**Deformation Densities**

**(C<sub>5</sub>I<sub>5</sub>)<sub>2</sub><sup>2-</sup> orbitals**

**Ba<sup>2+</sup> orbitals**

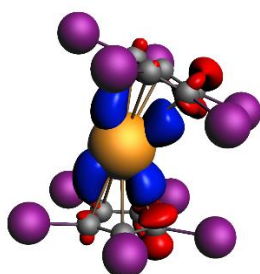

$\Delta E_1 = -21.4$ ;  $|v_1| = 0.40$

$\Delta E_2 = -20.0$ ;  $|v_2| = 0.38$

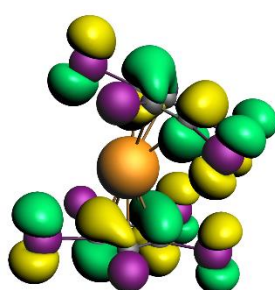

HOMO ( $\epsilon=-1.34$  eV)  $v_1=-0.12$

HOMO ( $\epsilon=-1.34$  eV)  $v_2=-0.08$

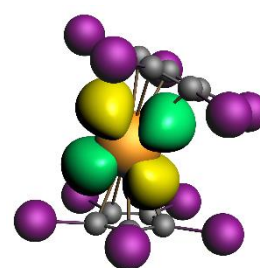

LUMO ( $\epsilon=-12.82$  eV)  $v_1=+0.19$

LUMO ( $\epsilon=-12.82$  eV)  $v_2=+0.17$

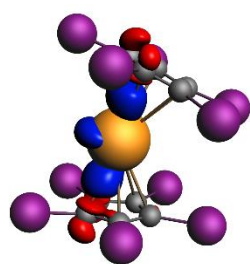

$\Delta E_3 = -16.9$ ;  $|v_3| = 0.38$

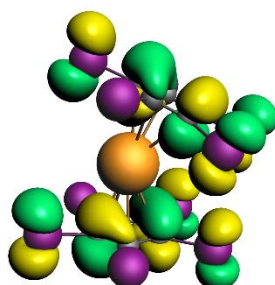

HOMO ( $\epsilon=-1.34$  eV)  $v_3=-0.06$

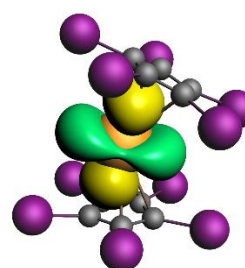

LUMO ( $\epsilon=-12.82$  eV)  $v_3=+0.14$

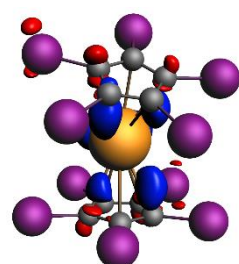

$\Delta E_4 = -8.3$ ;  $|v_4| = 0.22$

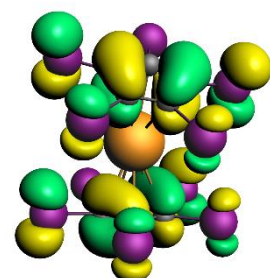

HOMO ( $\epsilon=-1.34$  eV)  $v_4=-0.02$

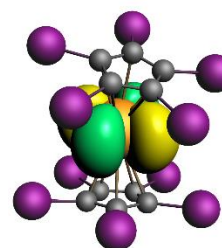

LUMO ( $\epsilon=-12.82$  eV)  $v_4=+0.05$

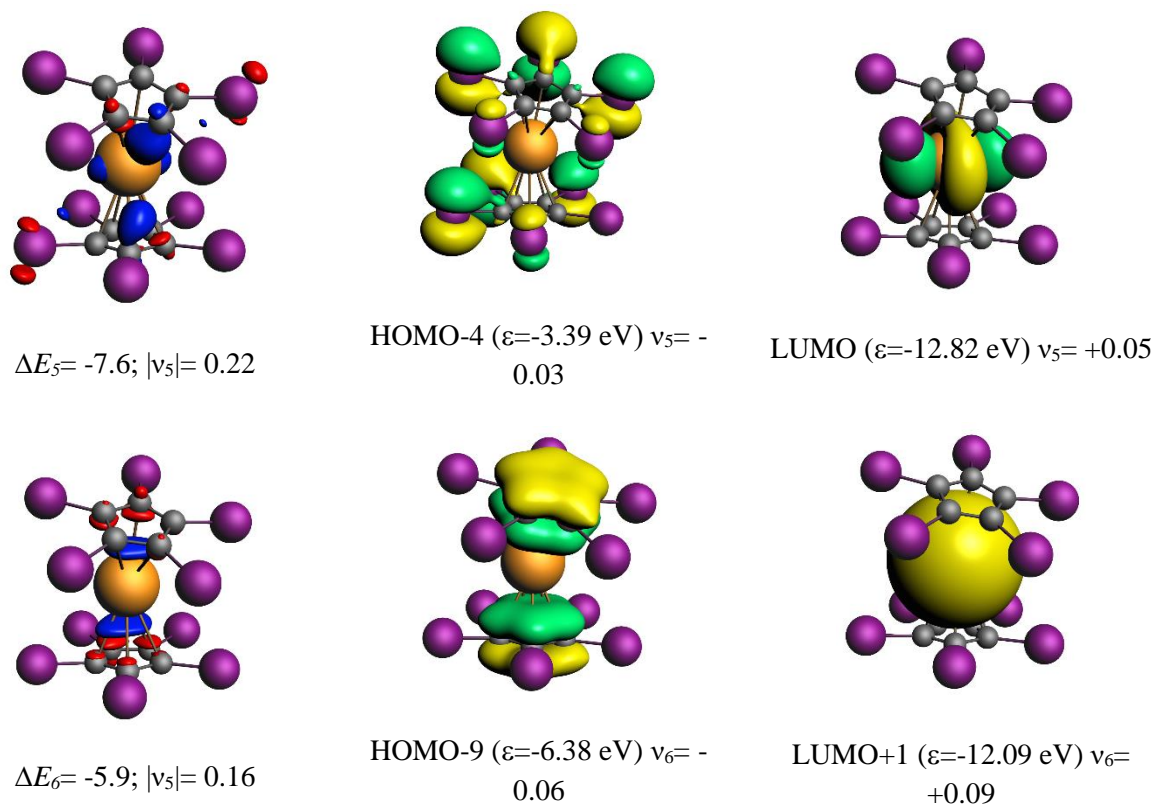

**Figure S6.** Plot of deformation densities (isovalue = 0.003) of the pairwise orbital interaction and shape of the most important occupied and vacant orbitals (isovalue = 0.03) in  $[\text{Ae}(\text{C}_5\text{I}_5)_2]$  (Ae=Be-Ba) with the orbital interaction energies  $\Delta E_{\text{orb}}$  (in kcal/mol) and their eigenvalues  $v$  (in e). The direction of the charge flow is red→blue. The eigenvalues  $v$  indicate the amount of donated (negative numbers) and accepted charge (positive numbers). The occupied orbitals are shown in yellow and blue for the different phases, while the unoccupied orbitals are in cyan and orange.

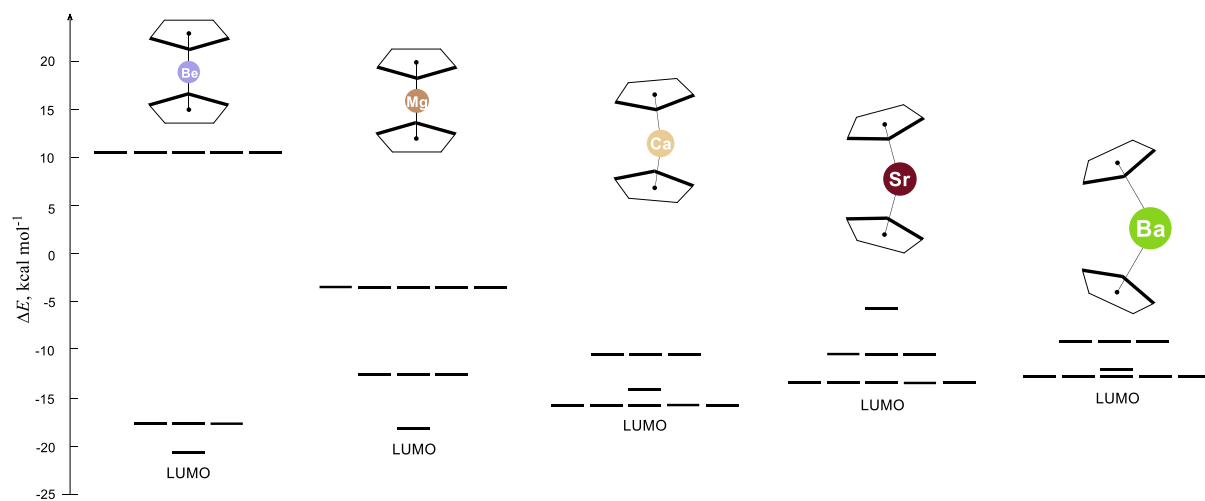

**Figure S7.** Energy of the orbitals for the group 2 at the BP86-D3(BJ)/TZ2P level of theory.



**Table S3.** Cp<sup>X</sup>–Cp<sup>X</sup> bond lengths [Ae(Cp<sup>X</sup>)<sub>2</sub>] (Ae = Be – Ba ; X = H, Me, F, I) metallocenes optimized at B3LYP-D3(BJ)/def2-TZVPP level of theory.

|    | [Ae(Cp) <sub>2</sub> ]                       | [Ae(Cp*) <sub>2</sub> ] | [Ae(C <sub>5</sub> I <sub>5</sub> ) <sub>2</sub> ] | [Ae(C <sub>5</sub> F <sub>5</sub> ) <sub>2</sub> ] |
|----|----------------------------------------------|-------------------------|----------------------------------------------------|----------------------------------------------------|
|    | Cp <sup>X</sup> –Cp <sup>X</sup> distance, Å |                         |                                                    |                                                    |
| Be | -                                            | 3.30                    | 3.35                                               | 3.27                                               |
| Mg | 4.00                                         | 3.92                    | 3.96                                               | 4.06                                               |
| Ca | 4.70                                         | 4.54                    | 4.61                                               | 4.57                                               |
| Sr | 5.04                                         | 4.82                    | 4.92                                               | 5.00                                               |
| Ba | 5.08                                         | 5.03                    | 5.23                                               | 5.17                                               |

**[Be(Cp)<sub>2</sub>]**

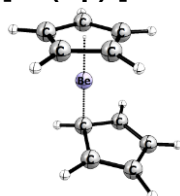

B3LYP-D3(BJ)/def2-tzvpp

Thermal correction to Gibbs Free Energy = 0.132740

Thermal correction to Enthalpy = 0.179136

Sum of electronic and thermal Free Energies = -401.884653

Sum of electronic and thermal Enthalpies = -401.838257

N<sub>imag</sub> = 0

|    |              |              |              |
|----|--------------|--------------|--------------|
| C  | 1.886210000  | 1.267213000  | -0.046460000 |
| C  | 1.662488000  | 0.287310000  | 0.953383000  |
| C  | 1.729149000  | -0.987519000 | 0.338966000  |
| C  | 1.987997000  | -0.796750000 | -1.040608000 |
| C  | 2.082215000  | 0.598059000  | -1.278874000 |
| C  | -1.720500000 | 1.116994000  | 0.299138000  |
| C  | -1.319093000 | 0.184430000  | -0.757548000 |
| C  | -1.704762000 | -1.137095000 | -0.255277000 |
| C  | -2.173299000 | -0.999111000 | 1.024965000  |
| C  | -2.183126000 | 0.394421000  | 1.367826000  |
| H  | -1.594277000 | -2.060091000 | -0.804122000 |
| H  | -1.463986000 | 0.440599000  | -1.804292000 |
| H  | -1.623521000 | 2.190602000  | 0.241927000  |
| H  | -2.489181000 | 0.798795000  | 2.321284000  |
| H  | -2.470756000 | -1.803698000 | 1.681026000  |
| H  | 2.207758000  | 1.067447000  | -2.239477000 |
| H  | 1.396831000  | 0.479328000  | 1.978066000  |
| H  | 1.827192000  | 2.332781000  | 0.092442000  |
| H  | 1.524001000  | -1.927810000 | 0.819737000  |
| H  | 2.026622000  | -1.569508000 | -1.788868000 |
| Be | 0.412135000  | 0.123699000  | -0.461290000 |

### [Mg(Cp)<sub>2</sub>]

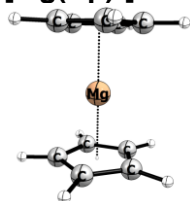

B3LYP-D3(BJ)/def2-tzvpp

Thermal correction to Gibbs Free Energy = 0.129458

Thermal correction to Enthalpy = 0.177326

Sum of electronic and thermal Free Energies = -587.256354

Sum of electronic and thermal Enthalpies = -587.208486

N<sub>imag</sub> = 0

|    |              |              |              |
|----|--------------|--------------|--------------|
| C  | 1.995346000  | 1.169789000  | 0.358804000  |
| C  | 2.002968000  | 0.052104000  | 1.230783000  |
| C  | 2.007352000  | -1.122548000 | 0.437225000  |
| C  | 2.002214000  | -0.730807000 | -0.925191000 |
| C  | 1.994831000  | 0.685877000  | -0.973664000 |
| C  | -2.007929000 | 1.174108000  | -0.187579000 |
| C  | -2.004553000 | 0.143059000  | -1.160448000 |
| C  | -1.995545000 | -1.100774000 | -0.480479000 |
| C  | -1.993789000 | -0.838558000 | 0.912638000  |
| C  | -2.001148000 | 0.567428000  | 1.093659000  |
| H  | -2.004890000 | -2.075187000 | -0.941806000 |
| H  | -2.022029000 | 0.280534000  | -2.229656000 |
| H  | -2.028630000 | 2.233447000  | -0.386956000 |
| H  | -2.015329000 | 1.084522000  | 2.039599000  |
| H  | -2.000897000 | -1.578506000 | 1.696737000  |
| H  | 2.004048000  | 1.289399000  | -1.866998000 |
| H  | 2.019055000  | 0.089063000  | 2.308177000  |
| H  | 2.004666000  | 2.205905000  | 0.656786000  |
| H  | 2.026701000  | -2.135753000 | 0.805251000  |
| H  | 2.017820000  | -1.393773000 | -1.775261000 |
| Mg | -0.000164000 | 0.000769000  | 0.030323000  |

### [Ca(Cp)<sub>2</sub>]

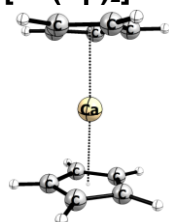

B3LYP-D3(BJ)/def2-tzvpp

Thermal correction to Gibbs Free Energy = 0.124512

Thermal correction to Enthalpy = 0.176616

Sum of electronic and thermal Free Energies = -1064.808771

Sum of electronic and thermal Enthalpies = -1064.756667

N<sub>imag</sub> = 0

|   |              |              |              |
|---|--------------|--------------|--------------|
| C | -2.370164000 | -1.192279000 | -0.074431000 |
| C | -2.357828000 | -0.291025000 | -1.164679000 |
| C | -2.334891000 | 1.023892000  | -0.644206000 |
| C | -2.333759000 | 0.935634000  | 0.767438000  |

|    |              |              |              |
|----|--------------|--------------|--------------|
| C  | -2.355517000 | -0.434053000 | 1.119634000  |
| H  | -2.428178000 | -2.268118000 | -0.141809000 |
| H  | -2.404167000 | -0.558805000 | -2.209404000 |
| H  | -2.359901000 | 1.935027000  | -1.222410000 |
| H  | -2.357615000 | 1.767405000  | 1.454940000  |
| H  | -2.399963000 | -0.830170000 | 2.122834000  |
| C  | 2.365135000  | -0.809960000 | -0.880789000 |
| C  | 2.342891000  | 0.594151000  | -1.050126000 |
| C  | 2.330868000  | 1.188943000  | 0.233059000  |
| C  | 2.346358000  | 0.152578000  | 1.195470000  |
| C  | 2.367231000  | -1.082993000 | 0.507192000  |
| H  | 2.418268000  | -1.543187000 | -1.671274000 |
| H  | 2.375065000  | 1.119863000  | -1.992351000 |
| H  | 2.352011000  | 2.247905000  | 0.441047000  |
| H  | 2.381759000  | 0.282409000  | 2.266469000  |
| H  | 2.422380000  | -2.060826000 | 0.961076000  |
| Ca | 0.000053000  | -0.029737000 | -0.002951000 |

### [Sr(Cp)<sub>2</sub>]

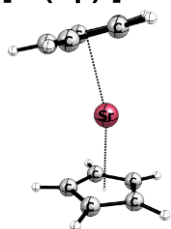

B3LYP-D3(BJ)/def2-tzvp

Thermal correction to Gibbs Free Energy = 0.121802

Thermal correction to Enthalpy = 0.176212

Sum of electronic and thermal Free Energies = -417.924149

Sum of electronic and thermal Enthalpies = -417.869739

N<sub>imag</sub> = 0

|    |              |              |              |
|----|--------------|--------------|--------------|
| C  | -2.650628000 | -0.851319000 | 0.703861000  |
| C  | -2.471787000 | 0.480215000  | 1.145089000  |
| C  | -2.360642000 | 1.307538000  | 0.004068000  |
| C  | -2.470785000 | 0.487878000  | -1.142563000 |
| C  | -2.650018000 | -0.846578000 | -0.710421000 |
| C  | 2.649963000  | -0.846232000 | 0.710905000  |
| C  | 2.650679000  | -0.851664000 | -0.703376000 |
| C  | 2.471876000  | 0.479655000  | -1.145267000 |
| C  | 2.360646000  | 1.307535000  | -0.004657000 |
| C  | 2.470700000  | 0.488434000  | 1.142382000  |
| H  | 2.475239000  | 0.812957000  | -2.172161000 |
| H  | 2.820058000  | -1.711658000 | -1.334053000 |
| H  | 2.818673000  | -1.701363000 | 1.348337000  |
| H  | 2.473012000  | 0.829600000  | 2.166692000  |
| H  | 2.259364000  | 2.382211000  | -0.008827000 |
| H  | -2.818785000 | -1.702018000 | -1.347424000 |
| H  | -2.475058000 | 0.814016000  | 2.171821000  |
| H  | -2.819955000 | -1.711005000 | 1.334972000  |
| H  | -2.259359000 | 2.382215000  | 0.007705000  |
| H  | -2.473187000 | 0.828546000  | -2.167038000 |
| Sr | -0.000001000 | -0.214639000 | -0.000004000 |

### [Ba(Cp)<sub>2</sub>]

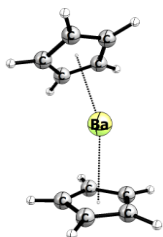

B3LYP-D3(BJ)/def2-tzvpp

Thermal correction to Gibbs Free Energy = 0.122750

Thermal correction to Enthalpy = 0.176007

Sum of electronic and thermal Free Energies = -412.701733

Sum of electronic and thermal Enthalpies = -412.648477

$N_{\text{imag}} = 0$

|    |              |              |              |
|----|--------------|--------------|--------------|
| C  | -2.339874000 | 0.922332000  | 1.077591000  |
| C  | -2.868951000 | -0.365908000 | 0.838675000  |
| C  | -2.946259000 | -0.553768000 | -0.558987000 |
| C  | -2.465711000 | 0.619054000  | -1.183923000 |
| C  | -2.091344000 | 1.531030000  | -0.172566000 |
| H  | -2.197502000 | 1.381502000  | 2.044517000  |
| H  | -3.208511000 | -1.061784000 | 1.591842000  |
| H  | -3.356792000 | -1.417573000 | -1.061025000 |
| H  | -2.438517000 | 0.806613000  | -2.247147000 |
| H  | -1.716560000 | 2.531232000  | -0.327058000 |
| C  | 2.489893000  | 0.558352000  | 1.193568000  |
| C  | 2.956714000  | -0.581035000 | 0.500230000  |
| C  | 2.851629000  | -0.322208000 | -0.884241000 |
| C  | 2.318794000  | 0.976322000  | -1.046629000 |
| C  | 2.095850000  | 1.520511000  | 0.237704000  |
| H  | 2.484751000  | 0.691527000  | 2.265319000  |
| H  | 3.376734000  | -1.469094000 | 0.949323000  |
| H  | 3.175362000  | -0.978585000 | -1.678684000 |
| H  | 2.157361000  | 1.484224000  | -1.985748000 |
| H  | 1.725280000  | 2.511632000  | 0.450256000  |
| Ba | -0.000108000 | -0.541210000 | -0.000181000 |

**[Be(Cp\*)<sub>2</sub>]**

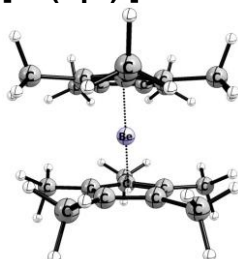

B3LYP-D3(BJ)/def2-tzvpp

Thermal correction to Gibbs Free Energy = 0.388992

Thermal correction to Enthalpy = 0.472463

Sum of electronic and thermal Free Energies = -795.006089

Sum of electronic and thermal Enthalpies = -794.922618

$N_{\text{imag}} = 0$

|    |              |              |              |
|----|--------------|--------------|--------------|
| Be | 0.000004000  | -0.000008000 | 0.000111000  |
| C  | 2.051148000  | 0.384420000  | -0.133020000 |
| C  | -1.048961000 | 1.002696000  | -1.398418000 |
| C  | 1.819240000  | -0.972812000 | 0.206174000  |

|   |              |              |              |
|---|--------------|--------------|--------------|
| C | 1.424974000  | 1.196910000  | 0.846944000  |
| C | -1.819250000 | 0.972989000  | -0.206106000 |
| C | -0.803627000 | -0.340655000 | -1.795414000 |
| C | 1.049032000  | -1.002776000 | 1.398348000  |
| C | 0.803673000  | 0.340603000  | 1.795750000  |
| C | -2.051248000 | -0.384222000 | 0.133293000  |
| C | -1.425007000 | -1.196890000 | -0.846520000 |
| C | -2.835951000 | -0.874572000 | 1.308124000  |
| H | -2.482990000 | -1.845243000 | 1.654402000  |
| H | -2.781496000 | -0.184590000 | 2.149460000  |
| H | -3.894155000 | -0.990438000 | 1.057018000  |
| C | 1.439395000  | 2.691657000  | 0.892266000  |
| H | 0.545630000  | 3.089833000  | 1.371183000  |
| H | 2.298971000  | 3.062557000  | 1.457605000  |
| H | 1.499846000  | 3.126509000  | -0.104690000 |
| C | 0.071991000  | 0.772273000  | 3.026279000  |
| H | -0.693286000 | 0.052700000  | 3.314364000  |
| H | 0.753518000  | 0.874279000  | 3.875488000  |
| H | -0.416950000 | 1.735940000  | 2.889756000  |
| C | 0.613275000  | -2.227442000 | 2.137362000  |
| H | 1.332483000  | -2.495062000 | 2.916564000  |
| H | -0.349753000 | -2.085335000 | 2.626306000  |
| H | 0.522610000  | -3.087532000 | 1.475673000  |
| C | -2.317411000 | 2.165442000  | 0.546331000  |
| H | -3.292612000 | 2.491074000  | 0.173329000  |
| H | -2.436090000 | 1.952616000  | 1.607953000  |
| H | -1.640517000 | 3.014102000  | 0.454038000  |
| C | -0.613553000 | 2.226425000  | -2.139190000 |
| H | -1.334885000 | 2.494783000  | -2.916181000 |
| H | -0.519479000 | 3.086663000  | -1.478150000 |
| H | 0.347610000  | 2.082515000  | -2.631257000 |
| C | -0.071360000 | -0.772061000 | -3.025669000 |
| H | 0.698077000  | -0.055448000 | -3.310069000 |
| H | 0.412565000  | -1.738477000 | -2.890848000 |
| H | -0.751555000 | -0.868329000 | -3.876599000 |
| C | 2.316858000  | -2.165226000 | -0.546630000 |
| H | 3.293535000  | -2.489295000 | -0.176182000 |
| H | 1.641218000  | -3.014528000 | -0.451542000 |
| H | 2.432122000  | -1.953417000 | -1.608817000 |
| C | 2.836303000  | 0.875053000  | -1.307413000 |
| H | 2.479604000  | 1.842948000  | -1.657728000 |
| H | 3.893279000  | 0.996948000  | -1.053933000 |
| H | 2.787498000  | 0.182121000  | -2.146644000 |
| C | -1.439512000 | -2.691628000 | -0.892041000 |
| H | -0.544803000 | -3.089932000 | -1.369046000 |
| H | -1.502170000 | -3.126717000 | 0.104706000  |
| H | -2.297914000 | -3.062306000 | -1.459300000 |

**[Mg(Cp\*)<sub>2</sub>]**

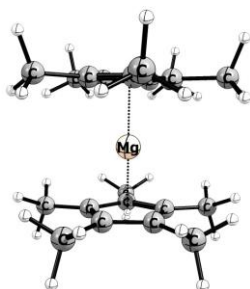

B3LYP-D3(BJ)/def2-tzvpp

Thermal correction to Gibbs Free Energy = 0.379227

Thermal correction to Enthalpy = 0.470309

Sum of electronic and thermal Free Energies = -980.376408

Sum of electronic and thermal Enthalpies = -980.285326

N<sub>imag</sub> = 0

|    |              |              |              |
|----|--------------|--------------|--------------|
| Mg | 0.000334000  | -0.002607000 | -0.001144000 |
| C  | -1.960777000 | -0.554909000 | -1.075673000 |
| C  | 1.959488000  | -1.043419000 | -0.621924000 |
| C  | -1.956844000 | 0.854554000  | -0.862976000 |
| C  | -1.959912000 | -1.192347000 | 0.198993000  |
| C  | 1.958424000  | -0.915998000 | 0.797597000  |
| C  | 1.960642000  | 0.267381000  | -1.181334000 |
| C  | -1.955592000 | 1.087411000  | 0.543037000  |
| C  | -1.956735000 | -0.177500000 | 1.198895000  |
| C  | 1.957553000  | 0.472911000  | 1.115137000  |
| C  | 1.958966000  | 1.203999000  | -0.107689000 |
| C  | 2.001378000  | 1.065432000  | 2.491322000  |
| H  | 1.468719000  | 2.016207000  | 2.539526000  |
| H  | 1.551332000  | 0.402876000  | 3.231085000  |
| H  | 3.028122000  | 1.257721000  | 2.816412000  |
| C  | -2.023947000 | -2.669765000 | 0.443436000  |
| H  | -1.525266000 | -2.950214000 | 1.372080000  |
| H  | -3.057743000 | -3.020007000 | 0.517873000  |
| H  | -1.554236000 | -3.234482000 | -0.362702000 |
| C  | -2.001174000 | -0.405101000 | 2.679994000  |
| H  | -1.526727000 | 0.408810000  | 3.228922000  |
| H  | -3.029081000 | -0.482218000 | 3.046226000  |
| H  | -1.492162000 | -1.327677000 | 2.962062000  |
| C  | -2.000704000 | 2.428019000  | 1.211970000  |
| H  | -3.028837000 | 2.773192000  | 1.355457000  |
| H  | -1.532671000 | 2.404679000  | 2.196561000  |
| H  | -1.487380000 | 3.191340000  | 0.626077000  |
| C  | 2.006661000  | -2.045720000 | 1.781703000  |
| H  | 3.035961000  | -2.319332000 | 2.031641000  |
| H  | 1.509114000  | -1.789616000 | 2.717917000  |
| H  | 1.524298000  | -2.942227000 | 1.391124000  |
| C  | 2.012665000  | -2.328834000 | -1.391810000 |
| H  | 3.043118000  | -2.641889000 | -1.583777000 |
| H  | 1.527191000  | -3.143789000 | -0.853572000 |
| H  | 1.520819000  | -2.241070000 | -2.361323000 |
| C  | 2.010468000  | 0.603079000  | -2.641296000 |
| H  | 1.559701000  | -0.180781000 | -3.250280000 |
| H  | 1.483092000  | 1.531740000  | -2.863043000 |
| H  | 3.039181000  | 0.728444000  | -2.991859000 |
| C  | -2.008044000 | 1.905839000  | -1.930604000 |

|   |              |              |              |
|---|--------------|--------------|--------------|
| H | -3.037697000 | 2.137450000  | -2.218845000 |
| H | -1.552894000 | 2.839990000  | -1.600023000 |
| H | -1.486787000 | 1.591924000  | -2.835943000 |
| C | -2.015362000 | -1.246985000 | -2.404174000 |
| H | -1.487145000 | -2.201219000 | -2.386691000 |
| H | -3.045354000 | -1.457331000 | -2.707129000 |
| H | -1.568469000 | -0.641442000 | -3.193160000 |
| C | 2.015064000  | 2.696108000  | -0.241136000 |
| H | 1.549382000  | 3.037446000  | -1.166251000 |
| H | 1.508501000  | 3.197280000  | 0.584693000  |
| H | 3.046600000  | 3.060553000  | -0.250131000 |

### [Ca(Cp\*)<sub>2</sub>]

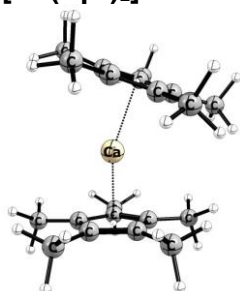

B3LYP-D3(BJ)/def2-tzvpp

Thermal correction to Gibbs Free Energy = 0.383150

Thermal correction to Enthalpy = 0.468400

Sum of electronic and thermal Free Energies = -1457.911950

Sum of electronic and thermal Enthalpies = -1457.826700

N<sub>imag</sub> = 1, ν = -8.4863i cm<sup>-1</sup>

|    |              |              |              |
|----|--------------|--------------|--------------|
| Ca | 0.000847000  | 0.006645000  | -0.397769000 |
| C  | 2.114623000  | 0.857073000  | 0.874891000  |
| C  | -2.092698000 | 0.773717000  | 0.955361000  |
| C  | 2.383308000  | 1.069227000  | -0.503040000 |
| C  | 2.065105000  | -0.543684000 | 1.101563000  |
| C  | -2.076535000 | -0.643140000 | 1.044955000  |
| C  | -2.357444000 | 1.125083000  | -0.395056000 |
| C  | 2.499150000  | -0.201102000 | -1.129119000 |
| C  | 2.301029000  | -1.198562000 | -0.136372000 |
| C  | -2.328642000 | -1.167608000 | -0.249537000 |
| C  | -2.503384000 | -0.074673000 | -1.140774000 |
| C  | -2.480889000 | -2.620297000 | -0.594493000 |
| H  | -2.213411000 | -2.825995000 | -1.632519000 |
| H  | -1.858155000 | -3.257947000 | 0.035468000  |
| H  | -3.512772000 | -2.961091000 | -0.463132000 |
| C  | 1.879382000  | -1.217171000 | 2.428554000  |
| H  | 1.370567000  | -2.177492000 | 2.332331000  |
| H  | 2.837753000  | -1.413685000 | 2.919266000  |
| H  | 1.290893000  | -0.607991000 | 3.115291000  |
| C  | 2.412342000  | -2.681448000 | -0.337966000 |
| H  | 2.152348000  | -2.977688000 | -1.355682000 |
| H  | 3.430967000  | -3.039302000 | -0.157584000 |
| H  | 1.761329000  | -3.236468000 | 0.339840000  |
| C  | 2.869098000  | -0.446955000 | -2.562958000 |
| H  | 3.953451000  | -0.516310000 | -2.695231000 |
| H  | 2.449131000  | -1.380742000 | -2.941538000 |
| H  | 2.525982000  | 0.355248000  | -3.219077000 |

|   |              |              |              |
|---|--------------|--------------|--------------|
| C | -1.907072000 | -1.447024000 | 2.299703000  |
| H | -2.869989000 | -1.667930000 | 2.770634000  |
| H | -1.421679000 | -2.405589000 | 2.108996000  |
| H | -1.303777000 | -0.922385000 | 3.040699000  |
| C | -1.936933000 | 1.729814000  | 2.100539000  |
| H | -2.901297000 | 1.980616000  | 2.553394000  |
| H | -1.313356000 | 1.314688000  | 2.893123000  |
| H | -1.480155000 | 2.671083000  | 1.790544000  |
| C | -2.544850000 | 2.519549000  | -0.917440000 |
| H | -1.937285000 | 3.245282000  | -0.373850000 |
| H | -2.284137000 | 2.601735000  | -1.974199000 |
| H | -3.584323000 | 2.849964000  | -0.825071000 |
| C | 2.603064000  | 2.399810000  | -1.161831000 |
| H | 3.654031000  | 2.703133000  | -1.120768000 |
| H | 2.323697000  | 2.387432000  | -2.217097000 |
| H | 2.029506000  | 3.194318000  | -0.681401000 |
| C | 1.985291000  | 1.924944000  | 1.920388000  |
| H | 1.347215000  | 1.610469000  | 2.746925000  |
| H | 2.955942000  | 2.189860000  | 2.351146000  |
| H | 1.559348000  | 2.844652000  | 1.515549000  |
| C | -2.883575000 | -0.172860000 | -2.589605000 |
| H | -2.538884000 | 0.689228000  | -3.163557000 |
| H | -2.472846000 | -1.066476000 | -3.063626000 |
| H | -3.969247000 | -0.221661000 | -2.720058000 |

### [Sr(Cp\*)<sub>2</sub>]

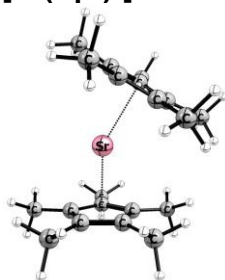

B3LYP-D3(BJ)/def2-tzvpp

Thermal correction to Gibbs Free Energy = 0.383156

Thermal correction to Enthalpy = 0.468047

Sum of electronic and thermal Free Energies = -811.023022

Sum of electronic and thermal Enthalpies = -810.938130

N<sub>imag</sub> = 1,  $\nu$  = -5.8962i cm<sup>-1</sup>

|    |              |              |              |
|----|--------------|--------------|--------------|
| Sr | -0.000095000 | -0.001131000 | -0.540138000 |
| C  | -2.161029000 | -0.757515000 | 1.024966000  |
| C  | 2.140172000  | -0.668518000 | 1.090678000  |
| C  | -2.530474000 | -1.123163000 | -0.295506000 |
| C  | -2.137165000 | 0.659879000  | 1.096866000  |
| C  | 2.159508000  | 0.749522000  | 1.030887000  |
| C  | 2.495264000  | -1.166207000 | -0.190046000 |
| C  | -2.735627000 | 0.067792000  | -1.040185000 |
| C  | -2.491657000 | 1.169658000  | -0.179287000 |
| C  | 2.526512000  | 1.127615000  | -0.286775000 |
| C  | 2.734975000  | -0.056271000 | -1.041722000 |
| C  | 3.221963000  | -0.121212000 | -2.460108000 |
| H  | 2.872379000  | -1.018289000 | -2.975913000 |
| H  | 2.897121000  | 0.740937000  | -3.046593000 |



|   |              |              |              |
|---|--------------|--------------|--------------|
| H | 4.315276000  | -0.138443000 | -2.515241000 |
| C | 2.752199000  | 2.531723000  | -0.766982000 |
| H | 2.556862000  | 2.639104000  | -1.836232000 |
| H | 2.117064000  | 3.250343000  | -0.245344000 |
| H | 3.785600000  | 2.855756000  | -0.606426000 |
| C | 1.934082000  | 1.683804000  | 2.182602000  |
| H | 2.866990000  | 1.913179000  | 2.707346000  |
| H | 1.512410000  | 2.638026000  | 1.861137000  |
| H | 1.250280000  | 1.263645000  | 2.920410000  |
| C | 1.893556000  | -1.495648000 | 2.317802000  |
| H | 2.826929000  | -1.741154000 | 2.834375000  |
| H | 1.261800000  | -0.974780000 | 3.037863000  |
| H | 1.403887000  | -2.443477000 | 2.086534000  |
| C | 2.677528000  | -2.611596000 | -0.551194000 |
| H | 2.016194000  | -3.263635000 | 0.022958000  |
| H | 2.484109000  | -2.799384000 | -1.609524000 |
| H | 3.698878000  | -2.954754000 | -0.356694000 |
| C | -3.223509000 | 0.145938000  | -2.457616000 |
| H | -4.316845000 | 0.164333000  | -2.511940000 |
| H | -2.873623000 | 1.047422000  | -2.965435000 |
| H | -2.899523000 | -0.711005000 | -3.052173000 |
| C | -2.762312000 | -2.522236000 | -0.787320000 |
| H | -3.797275000 | -2.842647000 | -0.629600000 |
| H | -2.567256000 | -2.621903000 | -1.857368000 |
| H | -2.130748000 | -3.248100000 | -0.271433000 |
| C | -1.936575000 | -1.702079000 | 2.168484000  |
| H | -1.247712000 | -1.291539000 | 2.907036000  |
| H | -2.868752000 | -1.930461000 | 2.694970000  |
| H | -1.521454000 | -2.656020000 | 1.837834000  |
| C | -2.669153000 | 2.618743000  | -0.527774000 |
| H | -2.476084000 | 2.814948000  | -1.584638000 |
| H | -3.689061000 | 2.963850000  | -0.329243000 |
| H | -2.004827000 | 3.263361000  | 0.051242000  |
| C | -1.887652000 | 1.475484000  | 2.331058000  |
| H | -1.396321000 | 2.424346000  | 2.107871000  |
| H | -2.820084000 | 1.718091000  | 2.850687000  |
| H | -1.256246000 | 0.946939000  | 3.045794000  |

### [Ba(Cp\*)<sub>2</sub>]

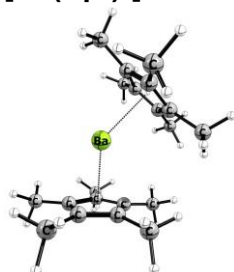

B3LYP-D3(BJ)/def2-tzvpp

Thermal correction to Gibbs Free Energy = 0.377556

Thermal correction to Enthalpy = 0.468676

Sum of electronic and thermal Free Energies = -805.809770

Sum of electronic and thermal Enthalpies = -805.718650

N<sub>imag</sub> = 0

|    |             |             |              |
|----|-------------|-------------|--------------|
| Ba | 0.000082000 | 0.000417000 | -0.689554000 |
|----|-------------|-------------|--------------|

|   |              |              |              |
|---|--------------|--------------|--------------|
| C | 2.722476000  | -1.054004000 | -0.305520000 |
| C | -2.567231000 | -1.196647000 | 0.098692000  |
| C | 2.228824000  | -0.880493000 | 1.012319000  |
| C | 2.932859000  | 0.228977000  | -0.868320000 |
| C | -2.932726000 | -0.227318000 | -0.868887000 |
| C | -2.135684000 | -0.514093000 | 1.263812000  |
| C | 2.135513000  | 0.511977000  | 1.264786000  |
| C | 2.567207000  | 1.196618000  | 0.100904000  |
| C | -2.722253000 | 1.054658000  | -0.303882000 |
| C | -2.228822000 | 0.878808000  | 1.013761000  |
| C | 3.496954000  | 0.518239000  | -2.228060000 |
| H | 3.107792000  | 1.450124000  | -2.646257000 |
| H | 4.586559000  | 0.623005000  | -2.207530000 |
| H | 3.277277000  | -0.277975000 | -2.943143000 |
| C | 3.025963000  | -2.370386000 | -0.957981000 |
| H | 2.961791000  | -2.315045000 | -2.047071000 |
| H | 4.036431000  | -2.721773000 | -0.724967000 |
| H | 2.343617000  | -3.158034000 | -0.629055000 |
| C | 1.958833000  | -1.978990000 | 1.997707000  |
| H | 2.873455000  | -2.305805000 | 2.502922000  |
| H | 1.261960000  | -1.664276000 | 2.773784000  |
| H | 1.533674000  | -2.867224000 | 1.523449000  |
| C | 1.761171000  | 1.153081000  | 2.567577000  |
| H | 2.643227000  | 1.377575000  | 3.175887000  |
| H | 1.229158000  | 2.095648000  | 2.426131000  |
| H | 1.119795000  | 0.507747000  | 3.168095000  |
| C | 2.683800000  | 2.684699000  | -0.049049000 |
| H | 1.953113000  | 3.215133000  | 0.565205000  |
| H | 3.669807000  | 3.052662000  | 0.253228000  |
| H | 2.539158000  | 3.008064000  | -1.082958000 |
| C | -3.025677000 | 2.372114000  | -0.954144000 |
| H | -2.344802000 | 3.159741000  | -0.622193000 |
| H | -2.959278000 | 2.319100000  | -2.043227000 |
| H | -4.036979000 | 2.721991000  | -0.722450000 |
| C | -1.958699000 | 1.975721000  | 2.000863000  |
| H | -1.262290000 | 1.659651000  | 2.776787000  |
| H | -1.532950000 | 2.864376000  | 1.527909000  |
| H | -2.873389000 | 2.302264000  | 2.506139000  |
| C | -1.762153000 | -1.157651000 | 2.565618000  |
| H | -1.230147000 | -2.100023000 | 2.422817000  |
| H | -1.121102000 | -0.513541000 | 3.167795000  |
| H | -2.644613000 | -1.383198000 | 3.172950000  |
| C | -2.683986000 | -2.684482000 | -0.053869000 |
| H | -2.540669000 | -3.005874000 | -1.088575000 |
| H | -1.952446000 | -3.216050000 | 0.558402000  |
| H | -3.669562000 | -3.053115000 | 0.249035000  |
| C | -3.496749000 | -0.513926000 | -2.229193000 |
| H | -4.586344000 | -0.618898000 | -2.208953000 |
| H | -3.277176000 | 0.283809000  | -2.942632000 |
| H | -3.107396000 | -1.444843000 | -2.649294000 |

**[Be(5F-Cp)<sub>2</sub>]**

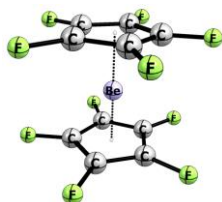

B3LYP-D3(BJ)/def2-tzvpp

Thermal correction to Gibbs Free Energy = 0.034766

Thermal correction to Enthalpy = 0.106836

Sum of electronic and thermal Free Energies = -1394.645772

Sum of electronic and thermal Enthalpies = -1394.573703

$N_{\text{imag}} = 0$

|    |              |              |              |
|----|--------------|--------------|--------------|
| C  | 1.616879000  | 0.678351000  | -1.015559000 |
| C  | 1.638496000  | 1.157694000  | 0.314631000  |
| C  | 1.655484000  | 0.040859000  | 1.181397000  |
| C  | 1.644159000  | -1.128833000 | 0.387299000  |
| C  | 1.620487000  | -0.735153000 | -0.970664000 |
| C  | -1.655482000 | -0.040809000 | -1.181399000 |
| C  | -1.638557000 | -1.157654000 | -0.314606000 |
| C  | -1.616913000 | -0.678250000 | 1.015604000  |
| C  | -1.620456000 | 0.735246000  | 0.970608000  |
| C  | -1.644096000 | 1.128872000  | -0.387330000 |
| Be | 0.000024000  | -0.000775000 | 0.000029000  |
| F  | 1.617869000  | -2.378229000 | 0.838196000  |
| F  | -1.606508000 | -2.433170000 | -0.684965000 |
| F  | 1.574635000  | -1.549664000 | -2.019295000 |
| F  | 1.637194000  | 0.083088000  | 2.509191000  |
| F  | 1.606047000  | 2.433165000  | 0.685048000  |
| F  | 1.567654000  | 1.424645000  | -2.113552000 |
| F  | -1.637168000 | -0.083137000 | -2.509191000 |
| F  | -1.567945000 | -1.424545000 | 2.113628000  |
| F  | -1.574378000 | 1.549750000  | 2.019217000  |
| F  | -1.617411000 | 2.378227000  | -0.838278000 |

**[Mg(5F-Cp)<sub>2</sub>]**

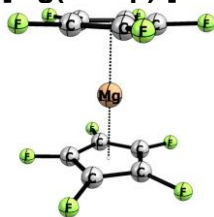

B3LYP-D3(BJ)/def2-tzvpp

Thermal correction to Gibbs Free Energy = 0.031344

Thermal correction to Enthalpy = 0.105096

Sum of electronic and thermal Free Energies = -1580.009878

Sum of electronic and thermal Enthalpies = -1579.936126

$N_{\text{imag}} = 0$

|   |              |              |              |
|---|--------------|--------------|--------------|
| C | -2.028159000 | 0.777930000  | 0.919180000  |
| C | -2.028881000 | 1.114149000  | -0.456492000 |
| C | -2.028770000 | -0.090252000 | -1.201156000 |
| C | -2.028319000 | -1.170753000 | -0.285830000 |
| C | -2.028112000 | -0.634265000 | 1.024817000  |
| C | 2.029073000  | 0.090383000  | 1.201113000  |

|    |              |              |              |
|----|--------------|--------------|--------------|
| C  | 2.028770000  | -1.114172000 | 0.456654000  |
| C  | 2.028517000  | -0.777987000 | -0.919033000 |
| C  | 2.027664000  | 0.634076000  | -1.024866000 |
| C  | 2.028303000  | 1.170749000  | 0.285527000  |
| F  | -2.092674000 | -2.465820000 | -0.602387000 |
| F  | 2.096928000  | -2.347548000 | 0.962117000  |
| F  | -2.095225000 | -1.335497000 | 2.158388000  |
| F  | -2.094770000 | -0.190019000 | -2.530552000 |
| F  | -2.097129000 | 2.347567000  | -0.961715000 |
| F  | -2.095638000 | 1.639723000  | 1.936043000  |
| F  | 2.095313000  | 0.190543000  | 2.530535000  |
| F  | 2.096170000  | -1.639890000 | -1.935811000 |
| F  | 2.094351000  | 1.335152000  | -2.158457000 |
| F  | 2.092690000  | 2.465865000  | 0.601844000  |
| Mg | -0.000055000 | 0.000014000  | 0.000039000  |

### [Ca(5F-Cp)<sub>2</sub>]

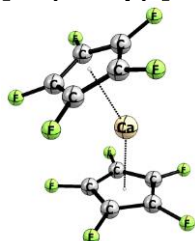

B3LYP-D3(BJ)/def2-tzvpp

Thermal correction to Gibbs Free Energy = 0.029247

Thermal correction to Enthalpy = 0.104924

Sum of electronic and thermal Free Energies = -2057.571438

Sum of electronic and thermal Enthalpies = -2057.495761

N<sub>imag</sub> = 0

|    |              |              |              |
|----|--------------|--------------|--------------|
| C  | 2.081793000  | 0.887658000  | 0.847077000  |
| C  | 2.012485000  | -0.494062000 | 1.123821000  |
| C  | 2.324626000  | -1.191064000 | -0.061342000 |
| C  | 2.584600000  | -0.241491000 | -1.070519000 |
| C  | 2.436470000  | 1.042851000  | -0.508420000 |
| C  | -2.081788000 | 0.887632000  | 0.847102000  |
| C  | -2.436465000 | 1.042865000  | -0.508391000 |
| C  | -2.584601000 | -0.241460000 | -1.070526000 |
| C  | -2.324632000 | -1.191063000 | -0.061375000 |
| C  | -2.012487000 | -0.494096000 | 1.123808000  |
| F  | 2.945031000  | -0.512333000 | -2.335442000 |
| F  | -2.641010000 | 2.207284000  | -1.142680000 |
| F  | 2.641017000  | 2.207251000  | -1.142745000 |
| F  | 2.409483000  | -2.522496000 | -0.195040000 |
| F  | 1.780009000  | -1.044705000 | 2.319777000  |
| F  | 1.924191000  | 1.876410000  | 1.734670000  |
| F  | -1.924183000 | 1.876359000  | 1.734723000  |
| F  | -2.945036000 | -0.512266000 | -2.335455000 |
| F  | -2.409494000 | -2.522490000 | -0.195111000 |
| F  | -1.780010000 | -1.044774000 | 2.319748000  |
| Ca | 0.000000000  | -0.006039000 | -0.541471000 |

### [Sr(5F-Cp)<sub>2</sub>]

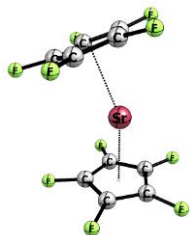

B3LYP-D3(BJ)/def2-tzvpp

Thermal correction to Gibbs Free Energy = 0.022984

Thermal correction to Enthalpy = 0.104527

Sum of electronic and thermal Free Energies = -1410.697190

Sum of electronic and thermal Enthalpies = -1410.615647

$N_{\text{imag}} = 0$

|    |              |              |              |
|----|--------------|--------------|--------------|
| C  | -2.514529000 | -1.197102000 | 0.025791000  |
| C  | -2.270711000 | -0.448773000 | 1.194578000  |
| C  | -2.345759000 | 0.918890000  | 0.858423000  |
| C  | -2.636827000 | 1.012755000  | -0.516159000 |
| C  | -2.740877000 | -0.293720000 | -1.029953000 |
| C  | 2.514619000  | -1.197352000 | 0.023556000  |
| C  | 2.740716000  | -0.292245000 | -1.030762000 |
| C  | 2.636582000  | 1.013396000  | -0.514869000 |
| C  | 2.345770000  | 0.917287000  | 0.859613000  |
| C  | 2.270903000  | -0.450940000 | 1.193581000  |
| F  | -2.791394000 | 2.150134000  | -1.216235000 |
| F  | 2.982919000  | -0.617287000 | -2.313845000 |
| F  | -2.984049000 | -0.620830000 | -2.312312000 |
| F  | -2.263897000 | 1.945479000  | 1.717373000  |
| F  | -2.129590000 | -0.946431000 | 2.430593000  |
| F  | -2.574161000 | -2.536335000 | -0.056605000 |
| F  | 2.573643000  | -2.536484000 | -0.061191000 |
| F  | 2.791379000  | 2.151907000  | -1.213021000 |
| F  | 2.264960000  | 1.942403000  | 1.720388000  |
| F  | 2.130396000  | -0.950566000 | 2.428868000  |
| Sr | -0.000031000 | 0.007077000  | -0.434182000 |

**[Ba(5F-Cp)<sub>2</sub>]**

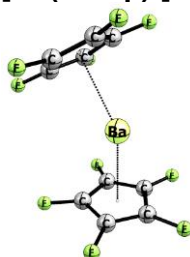

B3LYP-D3(BJ)/def2-tzvpp

Thermal correction to Gibbs Free Energy = 0.023006

Thermal correction to Enthalpy = 0.104591

Sum of electronic and thermal Free Energies = -1405.485637

Sum of electronic and thermal Enthalpies = -1405.404053

$N_{\text{imag}} = 0$

|   |             |              |              |
|---|-------------|--------------|--------------|
| C | 2.311169000 | 1.051598000  | -0.835279000 |
| C | 2.247490000 | 1.243336000  | 0.559288000  |
| C | 2.647772000 | 0.045628000  | 1.179490000  |
| C | 2.960569000 | -0.882962000 | 0.171645000  |
| C | 2.753043000 | -0.262476000 | -1.072064000 |

|    |              |              |              |
|----|--------------|--------------|--------------|
| C  | -2.647557000 | 0.048257000  | -1.179555000 |
| C  | -2.960548000 | -0.882554000 | -0.173824000 |
| C  | -2.753227000 | -0.264819000 | 1.071296000  |
| C  | -2.311291000 | 1.049763000  | 0.837496000  |
| C  | -2.247370000 | 1.244588000  | -0.556632000 |
| F  | 3.299888000  | -2.173143000 | 0.363596000  |
| F  | -3.299964000 | -2.172271000 | -0.368671000 |
| F  | 2.918801000  | -0.837785000 | -2.277454000 |
| F  | 2.724039000  | -0.173504000 | 2.504329000  |
| F  | 1.983992000  | 2.401038000  | 1.181345000  |
| F  | 2.105112000  | 1.992766000  | -1.768495000 |
| F  | -2.723827000 | -0.167860000 | -2.504882000 |
| F  | -2.919035000 | -0.842844000 | 2.275384000  |
| F  | -2.105227000 | 1.988820000  | 1.772838000  |
| F  | -1.983805000 | 2.403667000  | -1.176087000 |
| Ba | -0.000001000 | -0.644859000 | -0.000505000 |

### [Be(5Cl-Cp)<sub>2</sub>]

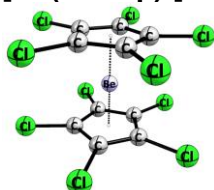

B3LYP-D3(BJ)/def2-tzvpp

Thermal correction to Gibbs Free Energy = 0.018938

Thermal correction to Enthalpy = 0.096247

Sum of electronic and thermal Free Energies = -4998.235540

Sum of electronic and thermal Enthalpies = -4998.158231

N<sub>imag</sub> = 0

|    |              |              |              |
|----|--------------|--------------|--------------|
| C  | 1.010339000  | 0.634929000  | 1.644716000  |
| C  | -0.302218000 | 1.168408000  | 1.638740000  |
| C  | -1.215029000 | 0.085075000  | 1.633622000  |
| C  | -0.467149000 | -1.118018000 | 1.636162000  |
| C  | 0.908354000  | -0.778372000 | 1.643011000  |
| C  | 1.215031000  | -0.084997000 | -1.633600000 |
| C  | 0.302239000  | -1.168371000 | -1.638883000 |
| C  | -1.010382000 | -0.634851000 | -1.644773000 |
| C  | -0.908299000 | 0.778438000  | -1.642959000 |
| C  | 0.467134000  | 1.118055000  | -1.635987000 |
| Be | -0.000096000 | -0.001257000 | 0.000075000  |
| Cl | -1.109691000 | -2.698741000 | 1.640119000  |
| Cl | 0.711287000  | -2.824947000 | -1.647299000 |
| Cl | 2.213115000  | -1.877826000 | 1.663088000  |
| Cl | 2.916916000  | -0.207772000 | -1.630962000 |
| Cl | 2.459426000  | 1.535532000  | 1.667097000  |
| Cl | 1.109672000  | 2.698740000  | -1.639919000 |
| Cl | -0.711269000 | 2.824940000  | 1.647073000  |
| Cl | -2.213047000 | 1.877896000  | -1.662688000 |
| Cl | -2.916910000 | 0.207827000  | 1.630963000  |
| Cl | -2.459482000 | -1.535458000 | -1.667506000 |

### [Mg(5Cl-Cp)<sub>2</sub>]

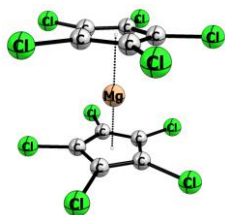

B3LYP-D3(BJ)/def2-tzvpp

Thermal correction to Gibbs Free Energy = 0.011867

Thermal correction to Enthalpy = 0.095271

Sum of electronic and thermal Free Energies = -5183.610906

Sum of electronic and thermal Enthalpies = -5183.527502

$N_{\text{imag}} = 0$

|    |              |              |              |
|----|--------------|--------------|--------------|
| C  | -1.985970000 | 1.067742000  | 0.564465000  |
| C  | -1.986211000 | 0.867544000  | -0.840168000 |
| C  | -1.987328000 | -0.530208000 | -1.083866000 |
| C  | -1.987725000 | -1.193799000 | 0.170254000  |
| C  | -1.986837000 | -0.206206000 | 1.188916000  |
| C  | 1.987015000  | 0.530110000  | 1.083932000  |
| C  | 1.986349000  | -0.867630000 | 0.840101000  |
| C  | 1.986351000  | -1.067654000 | -0.564562000 |
| C  | 1.986954000  | 0.206395000  | -1.188875000 |
| C  | 1.987296000  | 1.193863000  | -0.170096000 |
| Mg | -0.000008000 | -0.000375000 | -0.000178000 |
| Cl | 2.010395000  | 1.283705000  | 2.622122000  |
| Cl | -2.008106000 | 2.581781000  | 1.365558000  |
| Cl | -2.010553000 | -0.500394000 | 2.876333000  |
| Cl | 2.008929000  | -2.097644000 | 2.032131000  |
| Cl | -2.012438000 | -2.889574000 | 0.411881000  |
| Cl | 2.009210000  | -2.581585000 | -1.365872000 |
| Cl | -2.011132000 | -1.283963000 | -2.621971000 |
| Cl | 2.010754000  | 0.500791000  | -2.876257000 |
| Cl | -2.008361000 | 2.097405000  | -2.032367000 |
| Cl | 2.011346000  | 2.889688000  | -0.411468000 |

**[Ca(5Cl-Cp)<sub>2</sub>]**

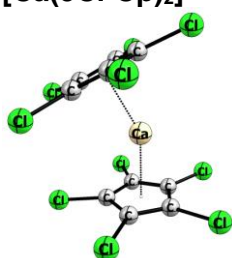

B3LYP-D3(BJ)/def2-tzvpp

Thermal correction to Gibbs Free Energy = 0.010238

Thermal correction to Enthalpy = 0.095306

Sum of electronic and thermal Free Energies = -5661.178312

Sum of electronic and thermal Enthalpies = -5661.093244

$N_{\text{imag}} = 0$

|   |             |              |              |
|---|-------------|--------------|--------------|
| C | 2.036977000 | 0.706650000  | 1.013361000  |
| C | 2.036890000 | -0.706128000 | 1.013731000  |
| C | 2.349021000 | -1.141954000 | -0.292191000 |
| C | 2.542387000 | -0.000324000 | -1.099484000 |
| C | 2.349165000 | 1.141753000  | -0.292788000 |

|    |              |              |              |
|----|--------------|--------------|--------------|
| C  | -2.182833000 | 1.142362000  | 0.397270000  |
| C  | -2.471041000 | 0.705424000  | -0.913686000 |
| C  | -2.470945000 | -0.706056000 | -0.913236000 |
| C  | -2.182676000 | -1.142121000 | 0.397997000  |
| C  | -2.007588000 | 0.000392000  | 1.209416000  |
| Ca | 0.004446000  | 0.000004000  | -0.531732000 |
| Cl | -2.679112000 | 1.713321000  | -2.291668000 |
| Cl | 2.422987000  | 2.774520000  | -0.822558000 |
| Cl | -2.065448000 | 2.774823000  | 0.912892000  |
| Cl | 1.748575000  | 1.716343000  | 2.367809000  |
| Cl | -1.709285000 | 0.000948000  | 2.895724000  |
| Cl | 1.748394000  | -1.715073000 | 2.368714000  |
| Cl | -2.065124000 | -2.774236000 | 0.914665000  |
| Cl | 2.422681000  | -2.775006000 | -0.821099000 |
| Cl | -2.678904000 | -1.714860000 | -2.290571000 |
| Cl | 2.850231000  | -0.000785000 | -2.792008000 |

### [Sr(5Cl-Cp)<sub>2</sub>]

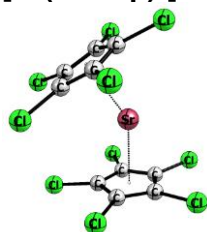

B3LYP-D3(BJ)/def2-tzvpp

Thermal correction to Gibbs Free Energy = 0.005700

Thermal correction to Enthalpy = 0.095093

Sum of electronic and thermal Free Energies = -5014.304521

Sum of electronic and thermal Enthalpies = -5014.215128

N<sub>imag</sub> = 0

|    |              |              |              |
|----|--------------|--------------|--------------|
| C  | -2.199002000 | -0.965708000 | 0.824074000  |
| C  | -2.110502000 | 0.390628000  | 1.205022000  |
| C  | -2.428010000 | 1.179848000  | 0.079678000  |
| C  | -2.716625000 | 0.312764000  | -0.993895000 |
| C  | -2.574468000 | -1.012160000 | -0.534405000 |
| C  | 2.427578000  | -1.179988000 | 0.080287000  |
| C  | 2.716456000  | -0.313633000 | -0.993804000 |
| C  | 2.574821000  | 1.011610000  | -0.535073000 |
| C  | 2.199383000  | 0.966086000  | 0.823444000  |
| C  | 2.110420000  | -0.389992000 | 1.205191000  |
| Sr | -0.000011000 | 0.000307000  | -0.633844000 |
| Cl | 2.417547000  | -2.897635000 | 0.016197000  |
| Cl | -2.698252000 | -2.431641000 | -1.499911000 |
| Cl | 3.007440000  | -0.789697000 | -2.623506000 |
| Cl | -3.007786000 | 0.787779000  | -2.623874000 |
| Cl | 2.698734000  | 2.430469000  | -1.501493000 |
| Cl | -2.418252000 | 2.897464000  | 0.014482000  |
| Cl | 1.916602000  | 2.321389000  | 1.837862000  |
| Cl | -1.741204000 | 0.975207000  | 2.773792000  |
| Cl | 1.741120000  | -0.973516000 | 2.774348000  |
| Cl | -1.915939000 | -2.320313000 | 1.839335000  |

### [Ba(5Cl-Cp)<sub>2</sub>]



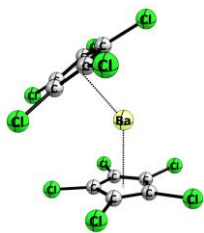

B3LYP-D3(BJ)/def2-tzvpp

Thermal correction to Gibbs Free Energy = 0.004525

Thermal correction to Enthalpy = 0.095116

Sum of electronic and thermal Free Energies = -5009.096271

Sum of electronic and thermal Enthalpies = -5009.005680

N<sub>imag</sub> = 0

|    |              |              |              |
|----|--------------|--------------|--------------|
| C  | -2.550049000 | -1.186724000 | 0.148115000  |
| C  | -2.176074000 | -0.420111000 | 1.269700000  |
| C  | -2.282763000 | 0.941646000  | 0.919952000  |
| C  | -2.727272000 | 1.013723000  | -0.414742000 |
| C  | -2.894325000 | -0.300521000 | -0.890659000 |
| C  | 2.730307000  | -0.999592000 | -0.447196000 |
| C  | 2.888088000  | 0.326305000  | -0.892912000 |
| C  | 2.544328000  | 1.186089000  | 0.168004000  |
| C  | 2.180302000  | 0.391406000  | 1.273169000  |
| C  | 2.292248000  | -0.961179000 | 0.891010000  |
| Ba | -0.001186000 | 0.003271000  | -0.754454000 |
| Cl | -1.719566000 | -1.034890000 | 2.803873000  |
| Cl | 1.962526000  | -2.322348000 | 1.883442000  |
| Cl | 2.869261000  | -2.411004000 | -1.423124000 |
| Cl | -2.514526000 | -2.902235000 | 0.038416000  |
| Cl | 3.197628000  | 0.808806000  | -2.517946000 |
| Cl | -3.219011000 | -0.743285000 | -2.523915000 |
| Cl | 2.500529000  | 2.903482000  | 0.099092000  |
| Cl | -2.866876000 | 2.448681000  | -1.355455000 |
| Cl | -1.939886000 | 2.277579000  | 1.941816000  |
| Cl | 1.732137000  | 0.967600000  | 2.824553000  |

**[Be(5Br-Cp)<sub>2</sub>]**

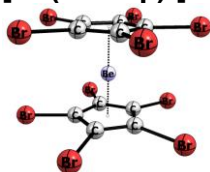

B3LYP-D3(BJ)/def2-tzvpp

Thermal correction to Gibbs Free Energy = 0.002222

Thermal correction to Enthalpy = 0.092382

Sum of electronic and thermal Free Energies = -26137.813497

Sum of electronic and thermal Enthalpies = -26137.723337

N<sub>imag</sub> = 0

|   |              |              |              |
|---|--------------|--------------|--------------|
| C | 1.062448000  | -0.544202000 | 1.660716000  |
| C | 0.852333000  | 0.856088000  | 1.654770000  |
| C | -0.544147000 | 1.088910000  | 1.651142000  |
| C | -1.197292000 | -0.167239000 | 1.654765000  |
| C | -0.204438000 | -1.176716000 | 1.660780000  |
| C | 0.544215000  | -1.088875000 | -1.651141000 |

|    |              |              |              |
|----|--------------|--------------|--------------|
| C  | -0.852323000 | -0.856106000 | -1.654728000 |
| C  | -1.062423000 | 0.544235000  | -1.660689000 |
| C  | 0.204484000  | 1.176712000  | -1.660794000 |
| C  | 1.197278000  | 0.167258000  | -1.654809000 |
| Be | -0.001111000 | -0.000551000 | 0.000049000  |
| Br | -3.044803000 | -0.444797000 | 1.713033000  |
| Br | -2.184499000 | -2.165643000 | -1.714827000 |
| Br | -0.511596000 | -3.018740000 | 1.732117000  |
| Br | 1.379030000  | -2.760561000 | -1.702011000 |
| Br | 2.719310000  | -1.405764000 | 1.732056000  |
| Br | 3.044792000  | 0.444836000  | -1.712550000 |
| Br | 2.184531000  | 2.165606000  | 1.714329000  |
| Br | 0.511615000  | 3.018737000  | -1.731813000 |
| Br | -1.378978000 | 2.760586000  | 1.702001000  |
| Br | -2.719297000 | 1.405791000  | -1.732342000 |

### [Mg(5Br-Cp)<sub>2</sub>]

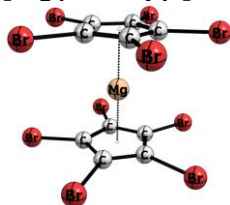

B3LYP-D3(BJ)/def2-tzvpp

Thermal correction to Gibbs Free Energy = -0.002407

Thermal correction to Enthalpy = 0.091745

Sum of electronic and thermal Free Energies = -26323.192747

Sum of electronic and thermal Enthalpies = -26323.098594

N<sub>imag</sub> = 0

|    |              |              |              |
|----|--------------|--------------|--------------|
| C  | -1.135244000 | 0.456236000  | 1.970696000  |
| C  | -0.760739000 | -0.911713000 | 1.991393000  |
| C  | 0.656149000  | -0.977938000 | 1.998207000  |
| C  | 1.157050000  | 0.348791000  | 1.980789000  |
| C  | 0.050071000  | 1.235312000  | 1.964267000  |
| C  | -0.656076000 | 0.977997000  | -1.998219000 |
| C  | 0.760682000  | 0.911946000  | -1.993254000 |
| C  | 1.135283000  | -0.456040000 | -1.971856000 |
| C  | -0.049904000 | -1.235289000 | -1.963112000 |
| C  | -1.156886000 | -0.348925000 | -1.978931000 |
| Mg | -0.000025000 | -0.000013000 | 0.000011000  |
| Br | 0.138012000  | 3.108442000  | 1.942747000  |
| Br | 1.932404000  | 2.375827000  | -2.014402000 |
| Br | 2.965845000  | 0.843760000  | 1.983227000  |
| Br | 2.889824000  | -1.118113000 | -1.962670000 |
| Br | 1.686978000  | -2.543971000 | 2.029208000  |
| Br | -0.137964000 | -3.108479000 | -1.940254000 |
| Br | -1.932724000 | -2.375374000 | 2.009702000  |
| Br | -2.965526000 | -0.844216000 | -1.978524000 |
| Br | -2.889900000 | 1.118138000  | 1.960107000  |
| Br | -1.687006000 | 2.543926000  | -2.029142000 |

### [Ca(5Br-Cp)<sub>2</sub>]

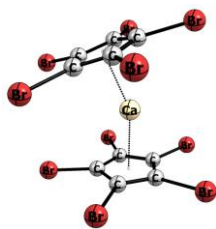

B3LYP-D3(BJ)/def2-tzvpp

Thermal correction to Gibbs Free Energy = -0.005714

Thermal correction to Enthalpy = 0.091778

Sum of electronic and thermal Free Energies = -26800.663606

Sum of electronic and thermal Enthalpies = -26800.761098

$N_{\text{imag}} = 0$

|    |              |              |              |
|----|--------------|--------------|--------------|
| C  | 2.149368000  | 0.971457000  | 0.730254000  |
| C  | 2.075717000  | -0.373576000 | 1.154090000  |
| C  | 2.282753000  | -1.197485000 | 0.027033000  |
| C  | 2.488843000  | -0.362619000 | -1.091882000 |
| C  | 2.405868000  | 0.977528000  | -0.657253000 |
| C  | -2.282346000 | 1.197499000  | 0.029162000  |
| C  | -2.488742000 | 0.364623000  | -1.091178000 |
| C  | -2.406222000 | -0.976299000 | -0.658847000 |
| C  | -2.149678000 | -0.972692000 | 0.728658000  |
| C  | -2.075590000 | 0.371583000  | 1.154804000  |
| Ca | -0.000007000 | -0.000036000 | -0.474410000 |
| Br | 2.484625000  | 2.500470000  | -1.758033000 |
| Br | -2.657547000 | 0.938856000  | -2.874906000 |
| Br | 2.657887000  | -0.933761000 | -2.876579000 |
| Br | -2.485364000 | -2.497312000 | -1.762264000 |
| Br | 2.222067000  | -3.074944000 | 0.006985000  |
| Br | -1.949296000 | -2.488709000 | 1.816222000  |
| Br | 1.813992000  | -0.962948000 | 2.914712000  |
| Br | -1.813821000 | 0.957852000  | 2.916454000  |
| Br | 1.948701000  | 2.485547000  | 1.820440000  |
| Br | -2.221236000 | 3.074967000  | 0.012373000  |

### [Sr(5Br-Cp)<sub>2</sub>]

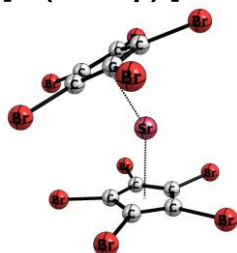

B3LYP-D3(BJ)/def2-tzvpp

Thermal correction to Gibbs Free Energy = -0.010285

Thermal correction to Enthalpy = 0.091589

Sum of electronic and thermal Free Energies = -26153.887245

Sum of electronic and thermal Enthalpies = -26153.785372

$N_{\text{imag}} = 0$

|   |              |              |              |
|---|--------------|--------------|--------------|
| C | -2.250994000 | -0.981085000 | 0.763546000  |
| C | -2.164220000 | 0.364062000  | 1.180993000  |
| C | -2.435574000 | 1.183738000  | 0.066238000  |
| C | -2.696820000 | 0.346705000  | -1.037244000 |

|    |              |              |              |
|----|--------------|--------------|--------------|
| C  | -2.581704000 | -0.990576000 | -0.606602000 |
| C  | 2.435179000  | -1.183725000 | 0.068393000  |
| C  | 2.696722000  | -0.348660000 | -1.036508000 |
| C  | 2.582039000  | 0.989393000  | -0.608149000 |
| C  | 2.251291000  | 0.982345000  | 0.762004000  |
| C  | 2.164084000  | -0.362057000 | 1.181745000  |
| Sr | 0.000012000  | -0.000114000 | -0.622066000 |
| Br | -1.978897000 | -2.492971000 | 1.843400000  |
| Br | -2.662851000 | -2.513635000 | -1.710117000 |
| Br | -1.821139000 | 0.958861000  | 2.926838000  |
| Br | -2.902575000 | 0.912657000  | -2.821914000 |
| Br | -2.370154000 | 3.062410000  | 0.036252000  |
| Br | 1.979544000  | 2.496154000  | 1.839256000  |
| Br | 2.663535000  | 2.510522000  | -1.714294000 |
| Br | 1.820976000  | -0.953764000 | 2.928636000  |
| Br | 2.902242000  | -0.917711000 | -2.820222000 |
| Br | 2.369305000  | -3.062423000 | 0.041651000  |

### [Ba(5Br-Cp)<sub>2</sub>]

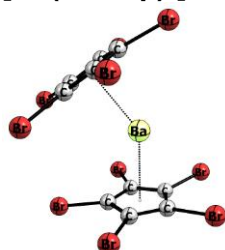

B3LYP-D3(BJ)/def2-tzvpp

Thermal correction to Gibbs Free Energy = -0.010264

Thermal correction to Enthalpy = 0.091578

Sum of electronic and thermal Free Energies = -26148.676703

Sum of electronic and thermal Enthalpies = -26148.574861

N<sub>imag</sub> = 0

|    |              |              |              |
|----|--------------|--------------|--------------|
| C  | -2.473310000 | -1.139510000 | 0.433738000  |
| C  | -2.269109000 | 0.000176000  | 1.236614000  |
| C  | -2.473438000 | 1.139603000  | 0.433405000  |
| C  | -2.814553000 | 0.703884000  | -0.861231000 |
| C  | -2.814468000 | -0.704210000 | -0.861027000 |
| C  | 2.675574000  | -1.139019000 | -0.180341000 |
| C  | 2.927659000  | -0.000176000 | -0.968869000 |
| C  | 2.675712000  | 1.138901000  | -0.180635000 |
| C  | 2.272090000  | 0.704944000  | 1.096951000  |
| C  | 2.272008000  | -0.704682000 | 1.097133000  |
| Ba | 0.015615000  | 0.000067000  | -0.747909000 |
| Br | -1.874740000 | 0.000470000  | 3.070881000  |
| Br | -2.274170000 | -2.926028000 | 0.981273000  |
| Br | -2.274421000 | 2.926303000  | 0.980394000  |
| Br | -2.972858000 | 1.801269000  | -2.383398000 |
| Br | -2.972748000 | -1.802063000 | -2.382854000 |
| Br | 1.828894000  | -1.811621000 | 2.547762000  |
| Br | 2.712055000  | -2.922550000 | -0.777811000 |
| Br | 1.829046000  | 1.812307000  | 2.547275000  |
| Br | 2.712314000  | 2.922262000  | -0.778602000 |
| Br | 3.265386000  | -0.000441000 | -2.821821000 |

### [Be(5I-Cp)<sub>2</sub>]

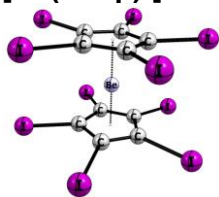

B3LYP-D3(BJ)/def2-tzvpp

Thermal correction to Gibbs Free Energy = -0.012179

Thermal correction to Enthalpy = 0.089534

Sum of electronic and thermal Free Energies = -3374.040358

Sum of electronic and thermal Enthalpies = -3373.938645

N<sub>imag</sub> = 0

|    |              |              |              |
|----|--------------|--------------|--------------|
| C  | -0.396726000 | -1.094087000 | 1.688369000  |
| C  | 0.997441000  | -0.840830000 | 1.638306000  |
| C  | 1.188598000  | 0.563195000  | 1.632829000  |
| C  | -0.086367000 | 1.180875000  | 1.681624000  |
| C  | -1.068709000 | 0.156571000  | 1.715452000  |
| C  | -1.188677000 | -0.562837000 | -1.633109000 |
| C  | -0.997190000 | 0.841068000  | -1.638188000 |
| C  | 0.397014000  | 1.094021000  | -1.688819000 |
| C  | 1.068928000  | -0.156760000 | -1.715334000 |
| C  | 0.086185000  | -1.180694000 | -1.680922000 |
| Be | -0.000309000 | -0.000470000 | 0.000039000  |
| I  | -0.451766000 | 3.215296000  | 1.859422000  |
| I  | 3.015309000  | 1.544652000  | 1.684789000  |
| I  | -3.107827000 | 0.435309000  | 1.979305000  |
| I  | -1.295130000 | -2.954054000 | 1.882924000  |
| I  | 2.493366000  | -2.276710000 | 1.702014000  |
| I  | 3.107916000  | -0.436191000 | -1.979230000 |
| I  | 0.451208000  | -3.215221000 | -1.858640000 |
| I  | -3.015438000 | -1.544158000 | -1.686220000 |
| I  | 1.295360000  | 2.953998000  | -1.883224000 |
| I  | -2.493031000 | 2.277056000  | -1.701167000 |

### [Mg(5I-Cp)<sub>2</sub>]

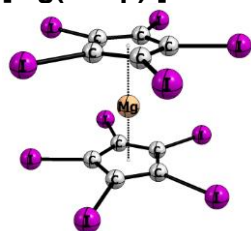

B3LYP-D3(BJ)/def2-tzvpp

Thermal correction to Gibbs Free Energy = -0.011300

Thermal correction to Enthalpy = 0.089069

Sum of electronic and thermal Free Energies = -3559.422738

Sum of electronic and thermal Enthalpies = -3559.322369

N<sub>imag</sub> = 0

|   |              |              |              |
|---|--------------|--------------|--------------|
| C | 1.004801000  | -0.712924000 | -1.970091000 |
| C | -0.351449000 | -1.137231000 | -1.992624000 |
| C | -1.174572000 | 0.021491000  | -2.000589000 |
| C | -0.325975000 | 1.161725000  | -1.983748000 |
| C | 1.020635000  | 0.708260000  | -1.964440000 |

|    |              |              |              |
|----|--------------|--------------|--------------|
| C  | 1.174679000  | -0.020840000 | 2.000845000  |
| C  | 0.350461000  | 1.137169000  | 1.992465000  |
| C  | -1.005680000 | 0.712576000  | 1.969784000  |
| C  | -1.019899000 | -0.708588000 | 1.965271000  |
| C  | 0.327035000  | -1.161694000 | 1.984671000  |
| Mg | 0.000059000  | 0.003107000  | -0.000099000 |
| I  | 2.673144000  | -1.954288000 | -1.976580000 |
| I  | 2.717046000  | 1.910201000  | -1.965193000 |
| I  | -0.946582000 | 3.146165000  | -2.011467000 |
| I  | -1.015976000 | -3.107389000 | -2.032268000 |
| I  | -3.252813000 | 0.043910000  | -2.055608000 |
| I  | 3.252878000  | -0.041848000 | 2.056823000  |
| I  | 0.949458000  | -3.145304000 | 2.011787000  |
| I  | 1.013028000  | 3.108289000  | 2.030161000  |
| I  | -2.674936000 | 1.952091000  | 1.980377000  |
| I  | -2.715265000 | -1.912524000 | 1.961815000  |

### [Ca(5I-Cp)<sub>2</sub>]

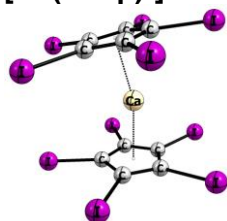

B3LYP-D3(BJ)/def2-tzvpp

Thermal correction to Gibbs Free Energy = -0.016798

Thermal correction to Enthalpy = 0.089175

Sum of electronic and thermal Free Energies = -4036.990815

Sum of electronic and thermal Enthalpies = -4036.884842

N<sub>imag</sub> = 0

|    |              |              |              |
|----|--------------|--------------|--------------|
| C  | 2.196466000  | 0.898782000  | 0.909062000  |
| C  | 2.011606000  | -0.405979000 | 1.423945000  |
| C  | 2.201488000  | -1.324687000 | 0.365307000  |
| C  | 2.506000000  | -0.588219000 | -0.803310000 |
| C  | 2.502207000  | 0.786151000  | -0.467150000 |
| C  | -2.218265000 | 1.325824000  | -0.340006000 |
| C  | -2.258928000 | 0.413616000  | -1.420422000 |
| C  | -2.341138000 | -0.893699000 | -0.885856000 |
| C  | -2.352841000 | -0.789219000 | 0.524506000  |
| C  | -2.278180000 | 0.582727000  | 0.861996000  |
| Ca | 0.034269000  | -0.008954000 | -0.307429000 |
| I  | 2.016252000  | 2.673338000  | 1.980760000  |
| I  | 2.717080000  | 2.371858000  | -1.800717000 |
| I  | 2.696524000  | -1.373399000 | -2.723819000 |
| I  | 1.573600000  | -0.890692000 | 3.398331000  |
| I  | 1.963178000  | -3.389469000 | 0.482751000  |
| I  | -1.983334000 | 3.389136000  | -0.488208000 |
| I  | -2.287433000 | 1.371299000  | 2.786532000  |
| I  | -1.994917000 | 0.894188000  | -3.430746000 |
| I  | -2.266020000 | -2.667421000 | -1.975292000 |
| I  | -2.444286000 | -2.376057000 | 1.867391000  |

### [Sr(5I-Cp)<sub>2</sub>]

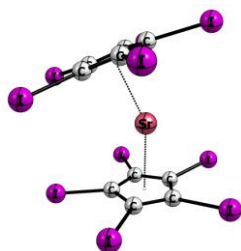

B3LYP-D3(BJ)/def2-tzvpp

Thermal correction to Gibbs Free Energy = -0.019303

Thermal correction to Enthalpy = 0.088980

Sum of electronic and thermal Free Energies = -3390.113029

Sum of electronic and thermal Enthalpies = -3390.004746

$N_{\text{imag}} = 0$

|    |              |              |              |
|----|--------------|--------------|--------------|
| C  | -2.373635000 | -1.243958000 | 0.255686000  |
| C  | -2.274736000 | -0.166440000 | 1.164923000  |
| C  | -2.424904000 | 1.035191000  | 0.435869000  |
| C  | -2.624373000 | 0.700054000  | -0.921685000 |
| C  | -2.593238000 | -0.708693000 | -1.033098000 |
| C  | 2.582772000  | -1.036470000 | -0.323574000 |
| C  | 2.704924000  | 0.165102000  | -1.057192000 |
| C  | 2.477817000  | 1.242336000  | -0.171369000 |
| C  | 2.219972000  | 0.707143000  | 1.110350000  |
| C  | 2.284304000  | -0.702237000 | 1.016082000  |
| Sr | 0.014038000  | 0.003982000  | -0.528141000 |
| I  | -2.139045000 | -3.259748000 | 0.722874000  |
| I  | -2.576314000 | -1.788658000 | -2.816336000 |
| I  | -2.054085000 | -0.323461000 | 3.227261000  |
| I  | -2.321812000 | 2.961555000  | 1.218800000  |
| I  | -2.681050000 | 2.048571000  | -2.510376000 |
| I  | 2.634277000  | -2.963113000 | -1.114977000 |
| I  | 2.023835000  | -2.046829000 | 2.582703000  |
| I  | 2.902800000  | 0.312287000  | -3.127395000 |
| I  | 2.343094000  | 3.253304000  | -0.699292000 |
| I  | 1.860622000  | 1.804138000  | 2.841518000  |

### [Ba(5I-Cp)<sub>2</sub>]

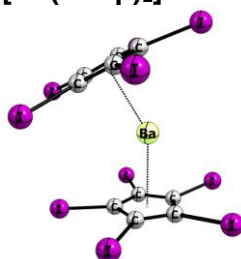

B3LYP-D3(BJ)/def2-tzvpp

Thermal correction to Gibbs Free Energy = -0.019634

Thermal correction to Enthalpy = 0.088977

Sum of electronic and thermal Free Energies = -3384.901172

Sum of electronic and thermal Enthalpies = -3384.792560

$N_{\text{imag}} = 0$

|   |              |              |             |
|---|--------------|--------------|-------------|
| C | -2.467002000 | -0.899359000 | 0.799774000 |
| C | -2.343037000 | 0.451176000  | 1.193896000 |
| C | -2.592668000 | 1.259092000  | 0.063601000 |

|    |              |              |              |
|----|--------------|--------------|--------------|
| C  | -2.877334000 | 0.409493000  | -1.026740000 |
| C  | -2.798077000 | -0.924465000 | -0.571706000 |
| C  | 2.577522000  | -1.260865000 | 0.083128000  |
| C  | 2.862086000  | -0.450050000 | -1.036370000 |
| C  | 2.804257000  | 0.898803000  | -0.623338000 |
| C  | 2.485844000  | 0.921345000  | 0.751032000  |
| C  | 2.349435000  | -0.414224000 | 1.189397000  |
| Ba | -0.002575000 | 0.009191000  | -0.656439000 |
| I  | 1.952699000  | -1.030517000 | 3.136412000  |
| I  | 2.229921000  | 2.624840000  | 1.919382000  |
| I  | 2.365981000  | -3.332950000 | 0.071712000  |
| I  | 3.050735000  | -1.113855000 | -3.002826000 |
| I  | 2.943625000  | 2.562849000  | -1.869184000 |
| I  | -3.093970000 | 1.007505000  | -3.011420000 |
| I  | -2.937648000 | -2.629977000 | -1.759638000 |
| I  | -2.188825000 | -2.561505000 | 2.021105000  |
| I  | -1.925662000 | 1.134125000  | 3.114268000  |
| I  | -2.394252000 | 3.330798000  | -0.019349000 |
